# Supplementary material
Source: Royal Society of Chemistry journal article supplement (doi:10.1039/d6cp01268j)

Orbital energies (in eV)

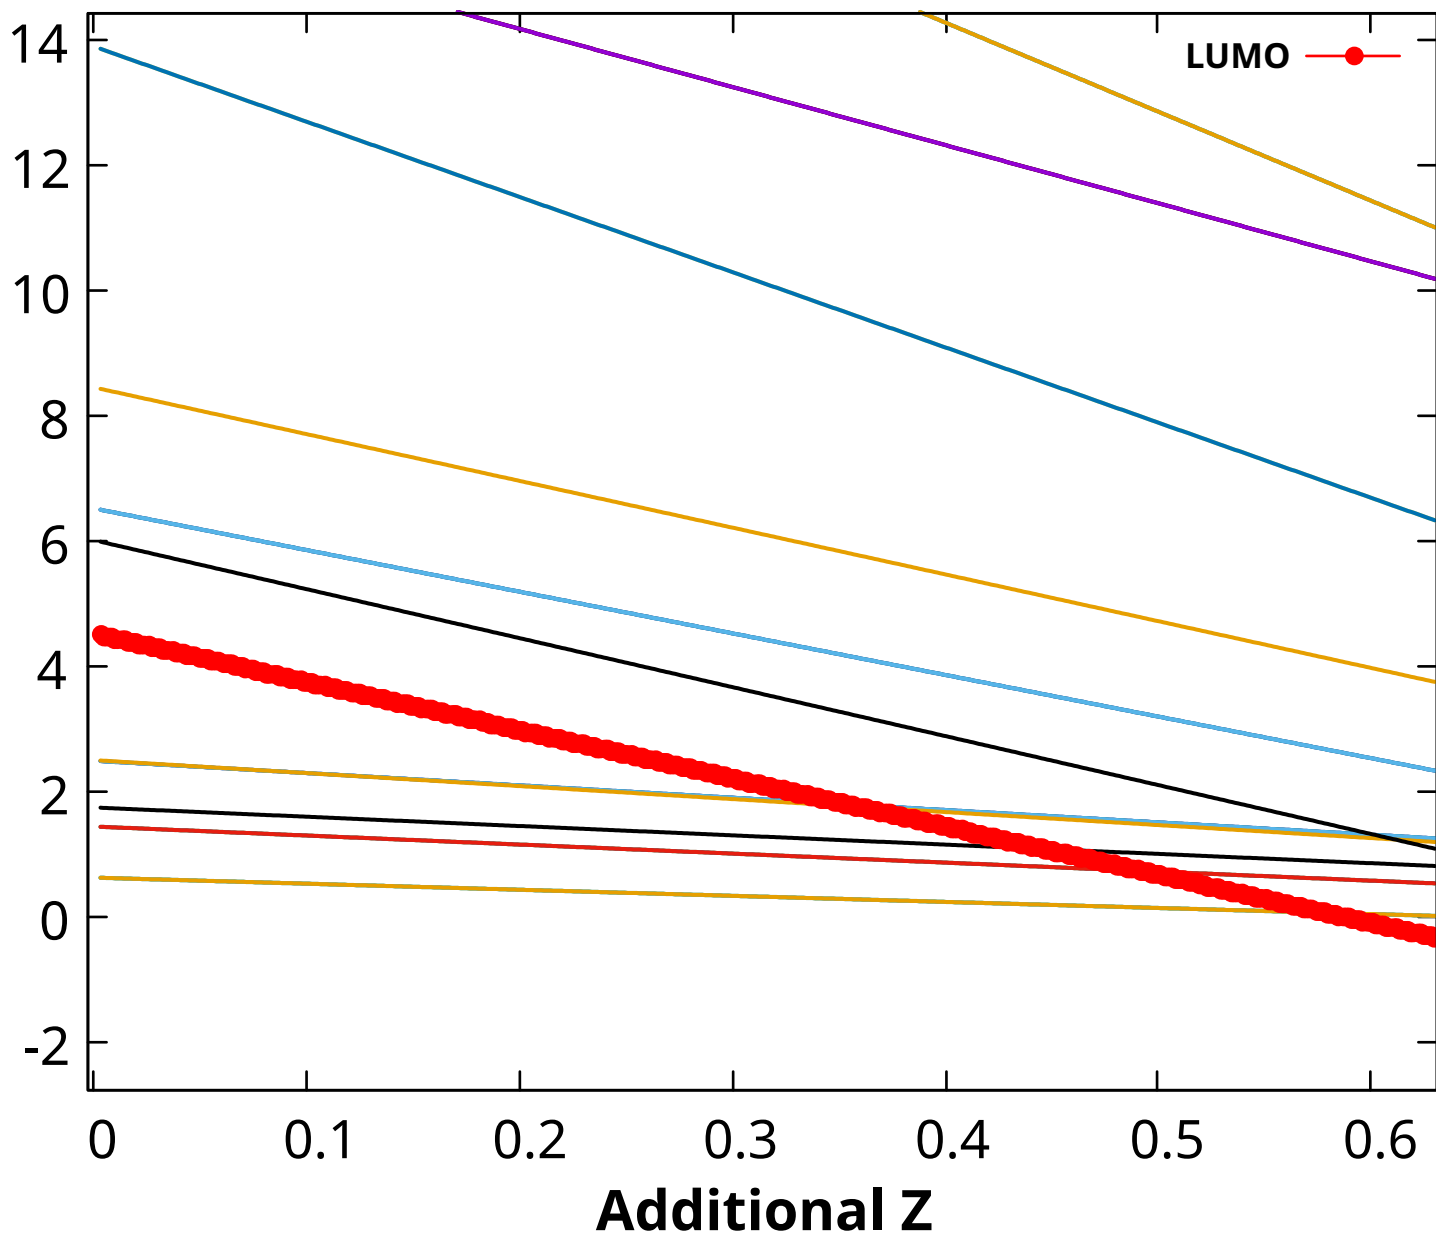

Supplement: d6cp01268j2.zip [file charge_5p4s.pdf › supp/SIH4/charge_5p4s.pdf]

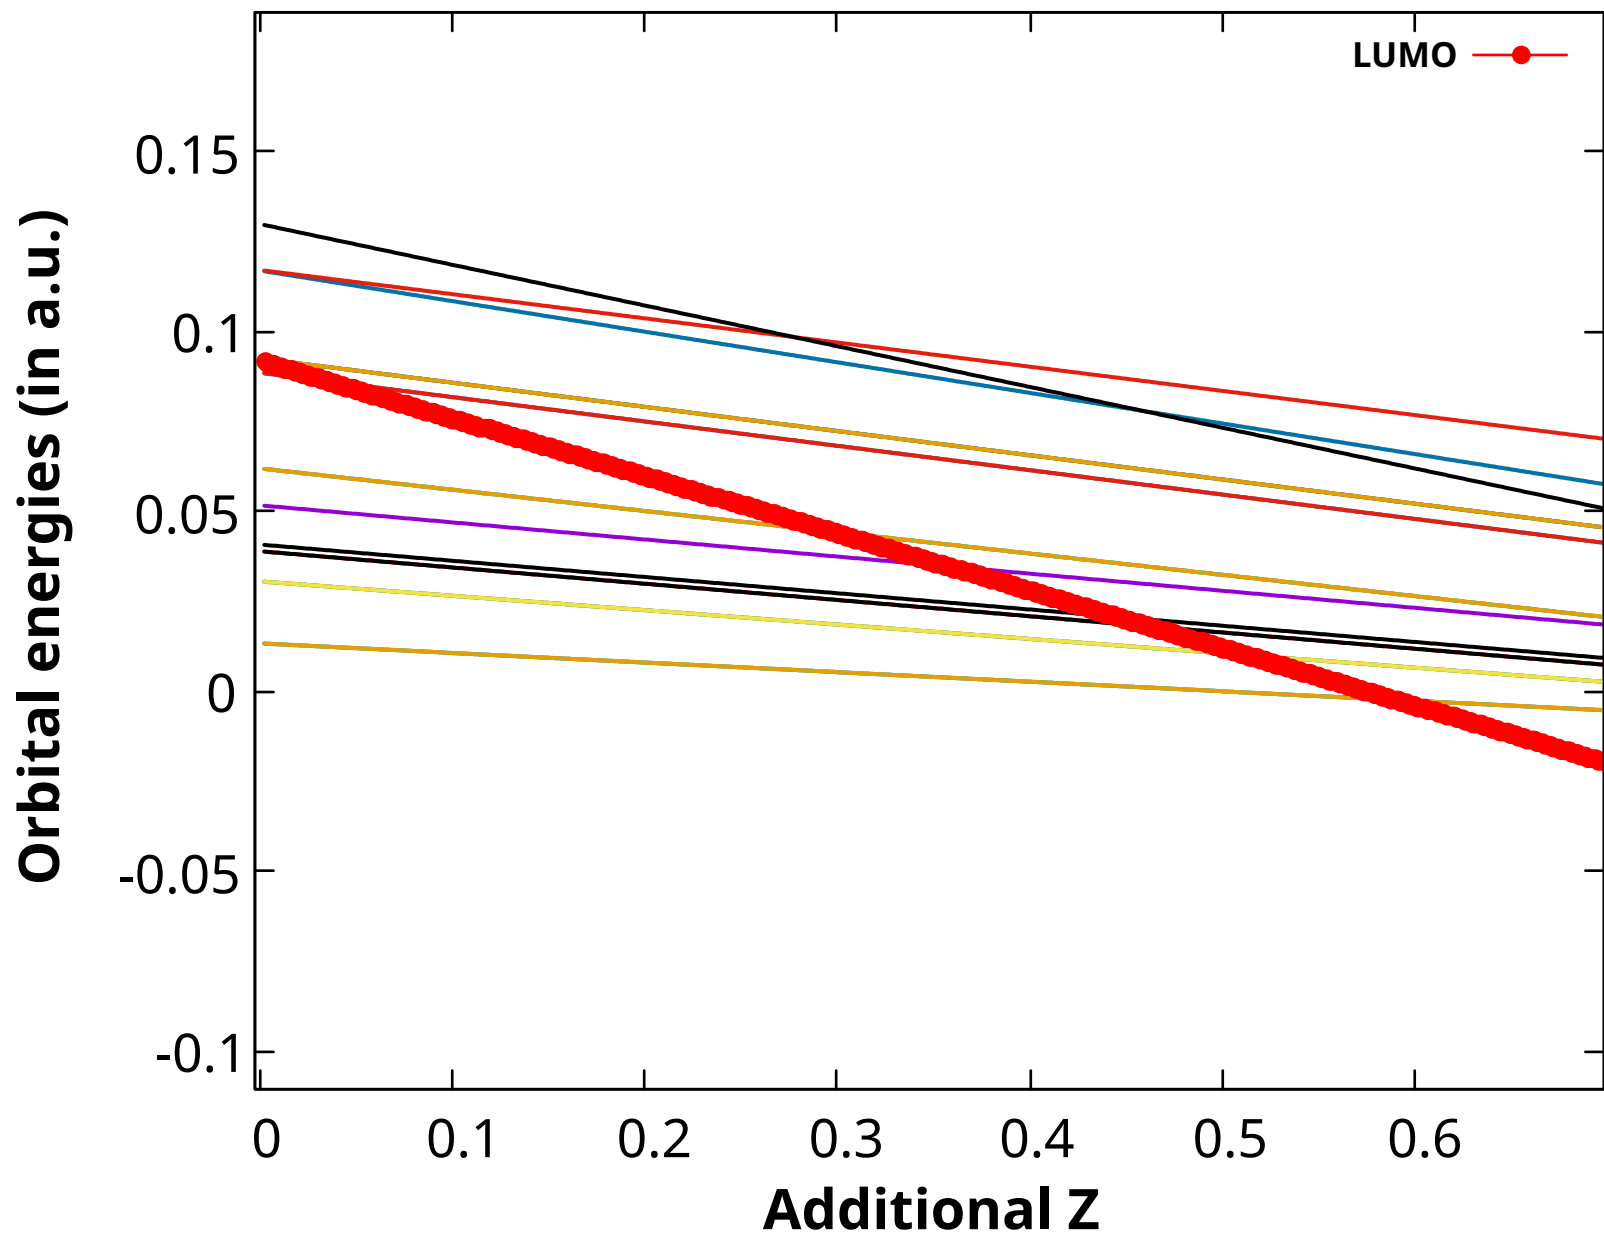

Supplement: d6cp01268j2.zip [file charge_aug_4p4d.pdf › supp/SIH4/charge_aug_4p4d.pdf]

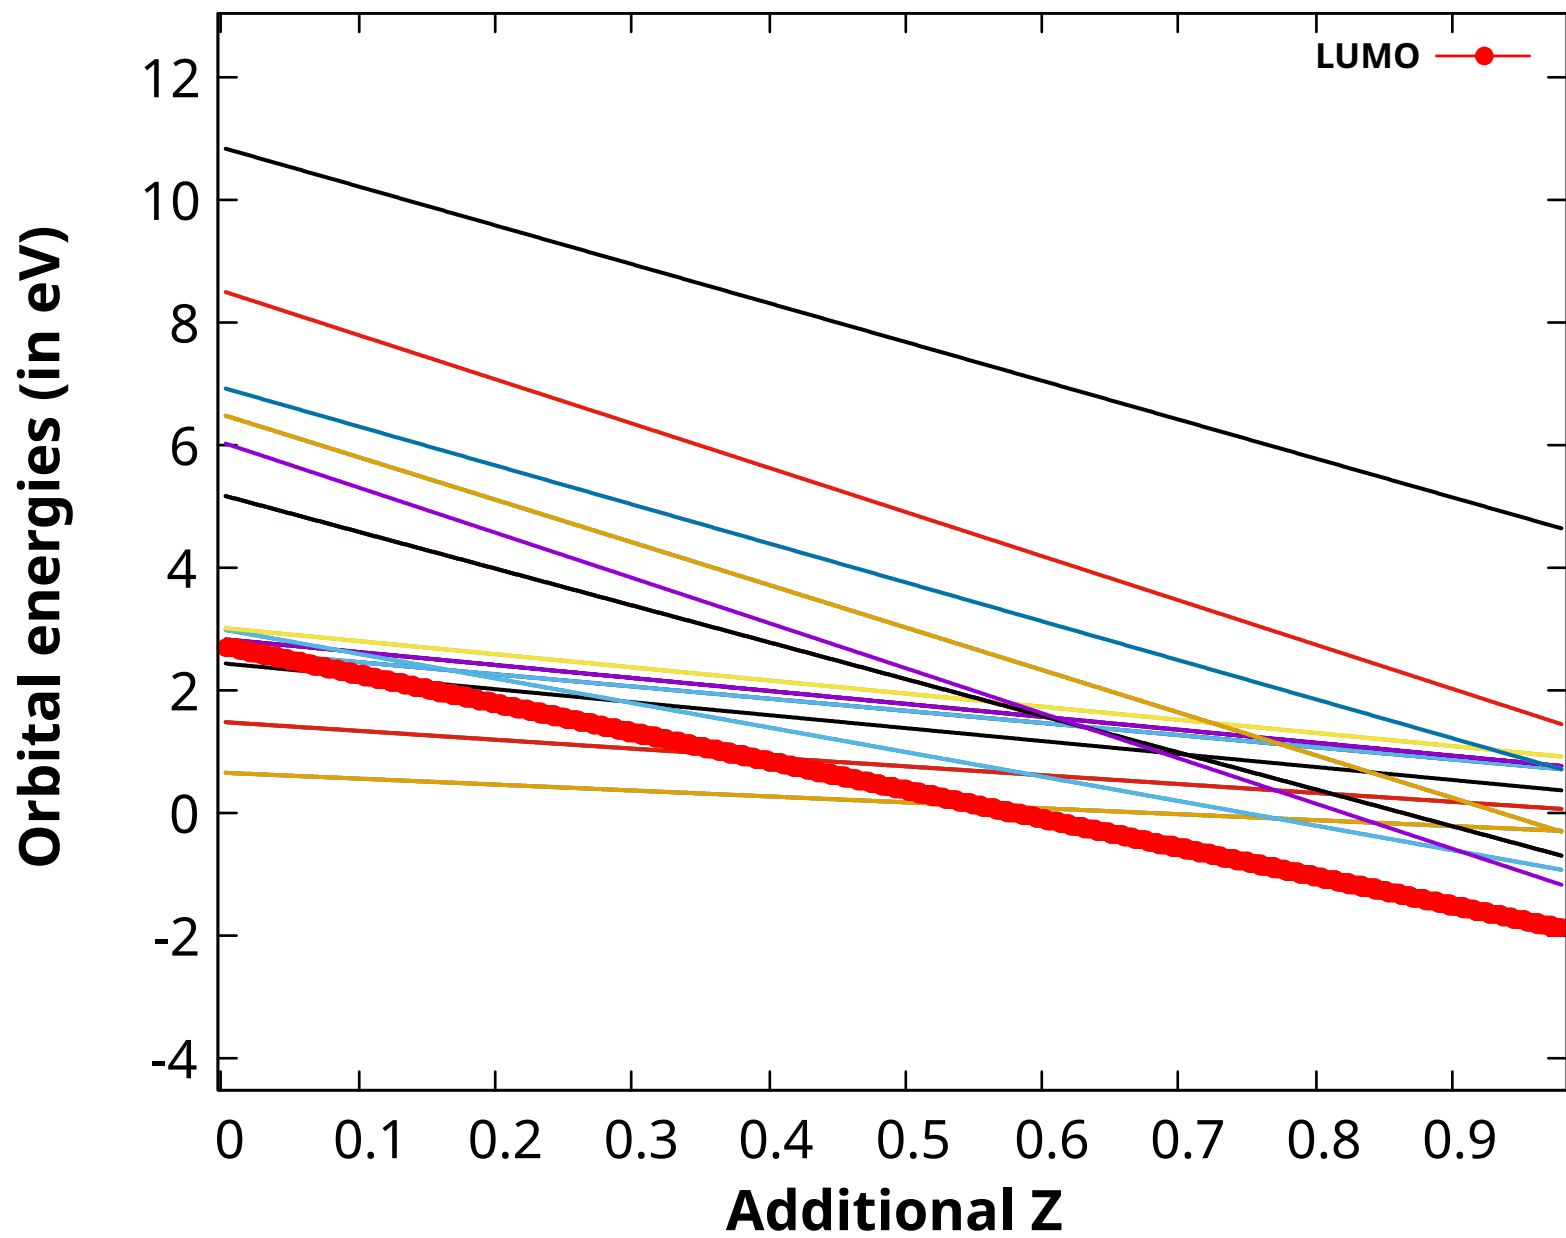

Supplement: d6cp01268j2.zip [file charge_stab_5p4d.pdf › supp/SIH4/charge_stab_5p4d.pdf]

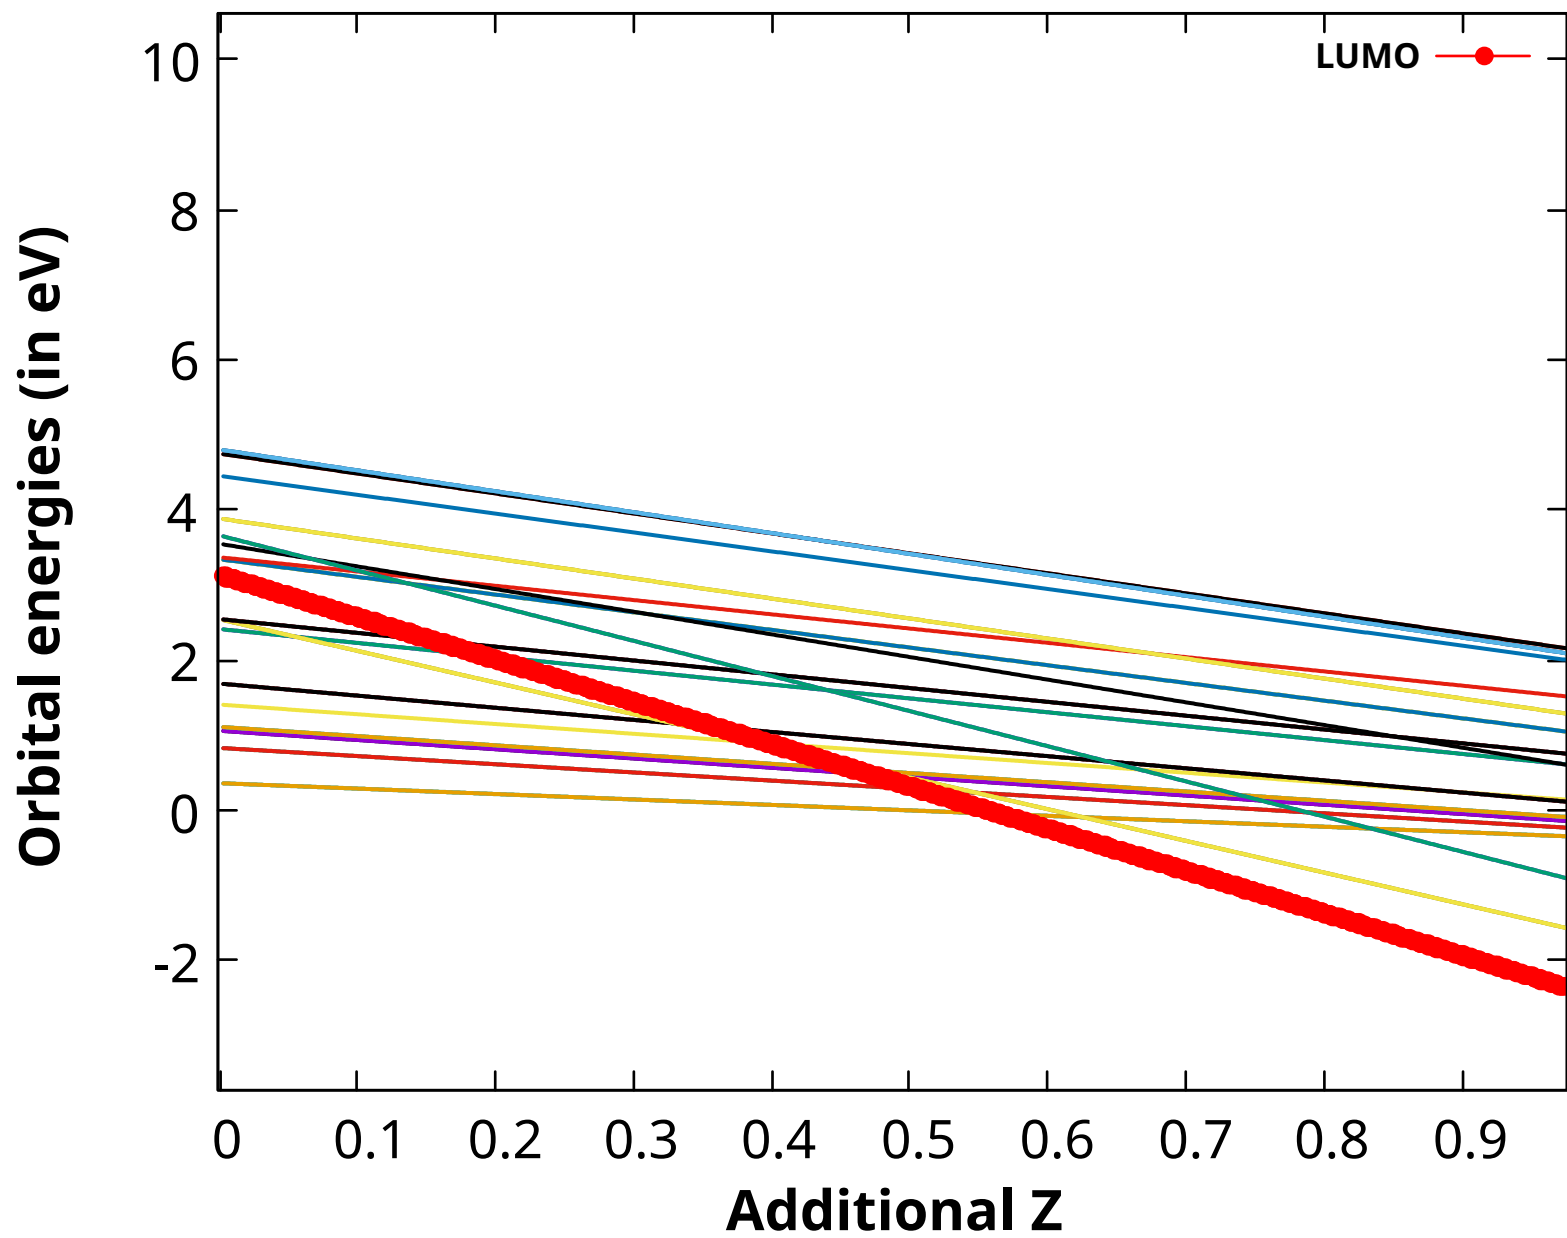

Supplement: d6cp01268j2.zip [file charge_stab_aug5p4d.pdf › supp/SIH4/charge_stab_aug5p4d.pdf]

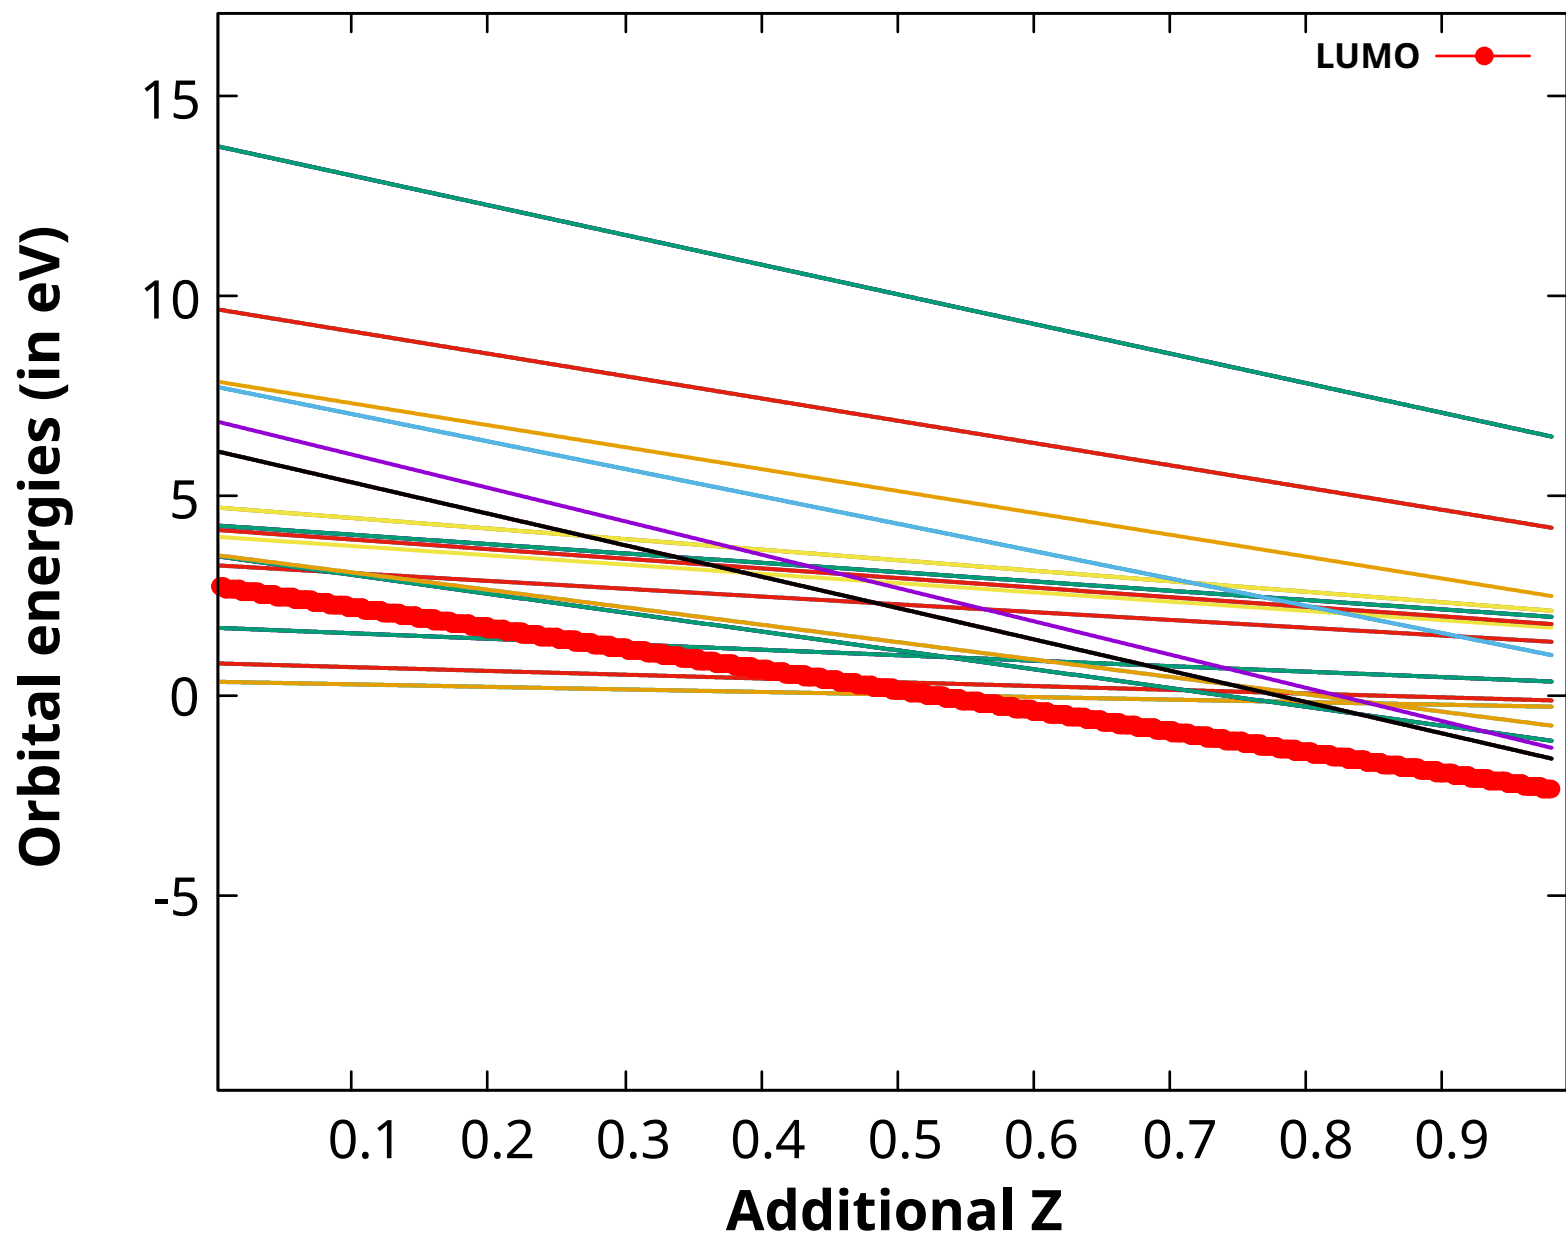

Supplement: d6cp01268j2.zip [file charge_stab_tz_5p4d.pdf › supp/SIH4/charge_stab_tz_5p4d.pdf]

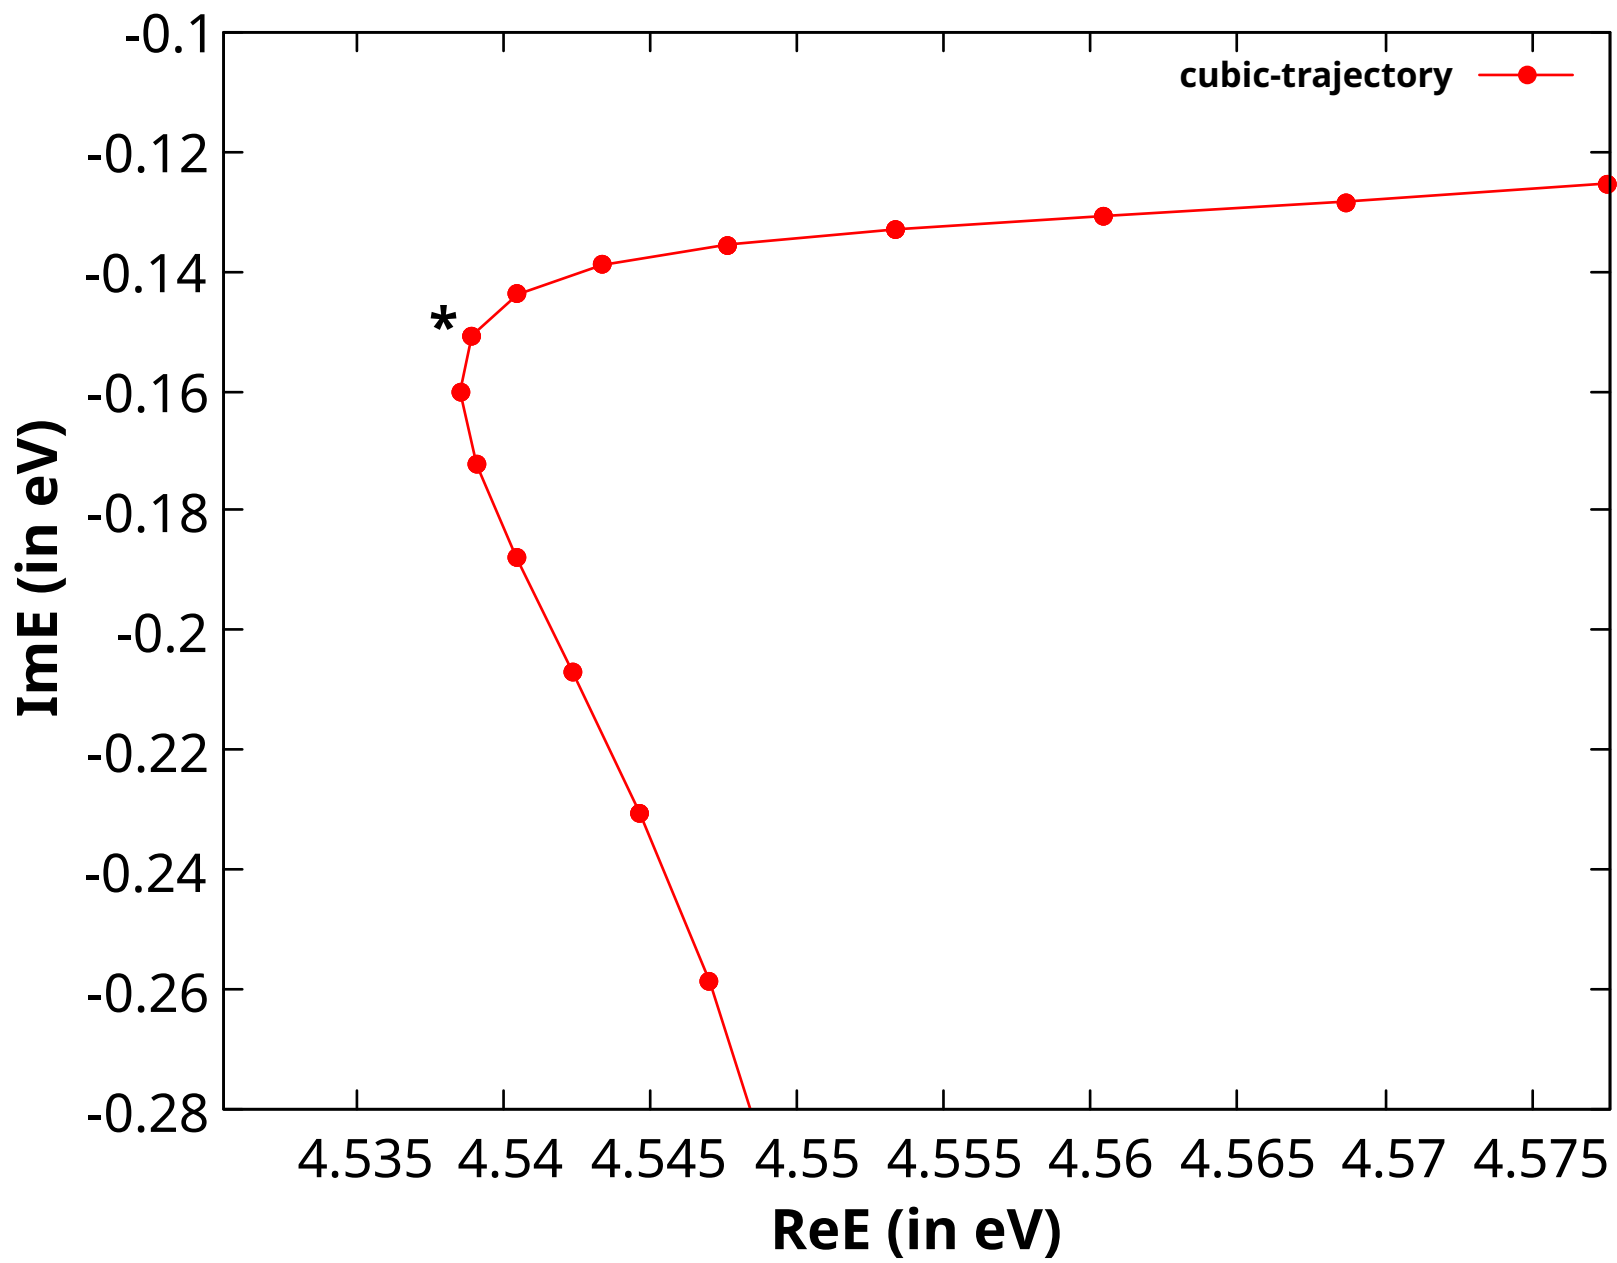

Supplement: d6cp01268j2.zip [file cubic_tra.pdf › supp/SIH4/cubic_tra.pdf]

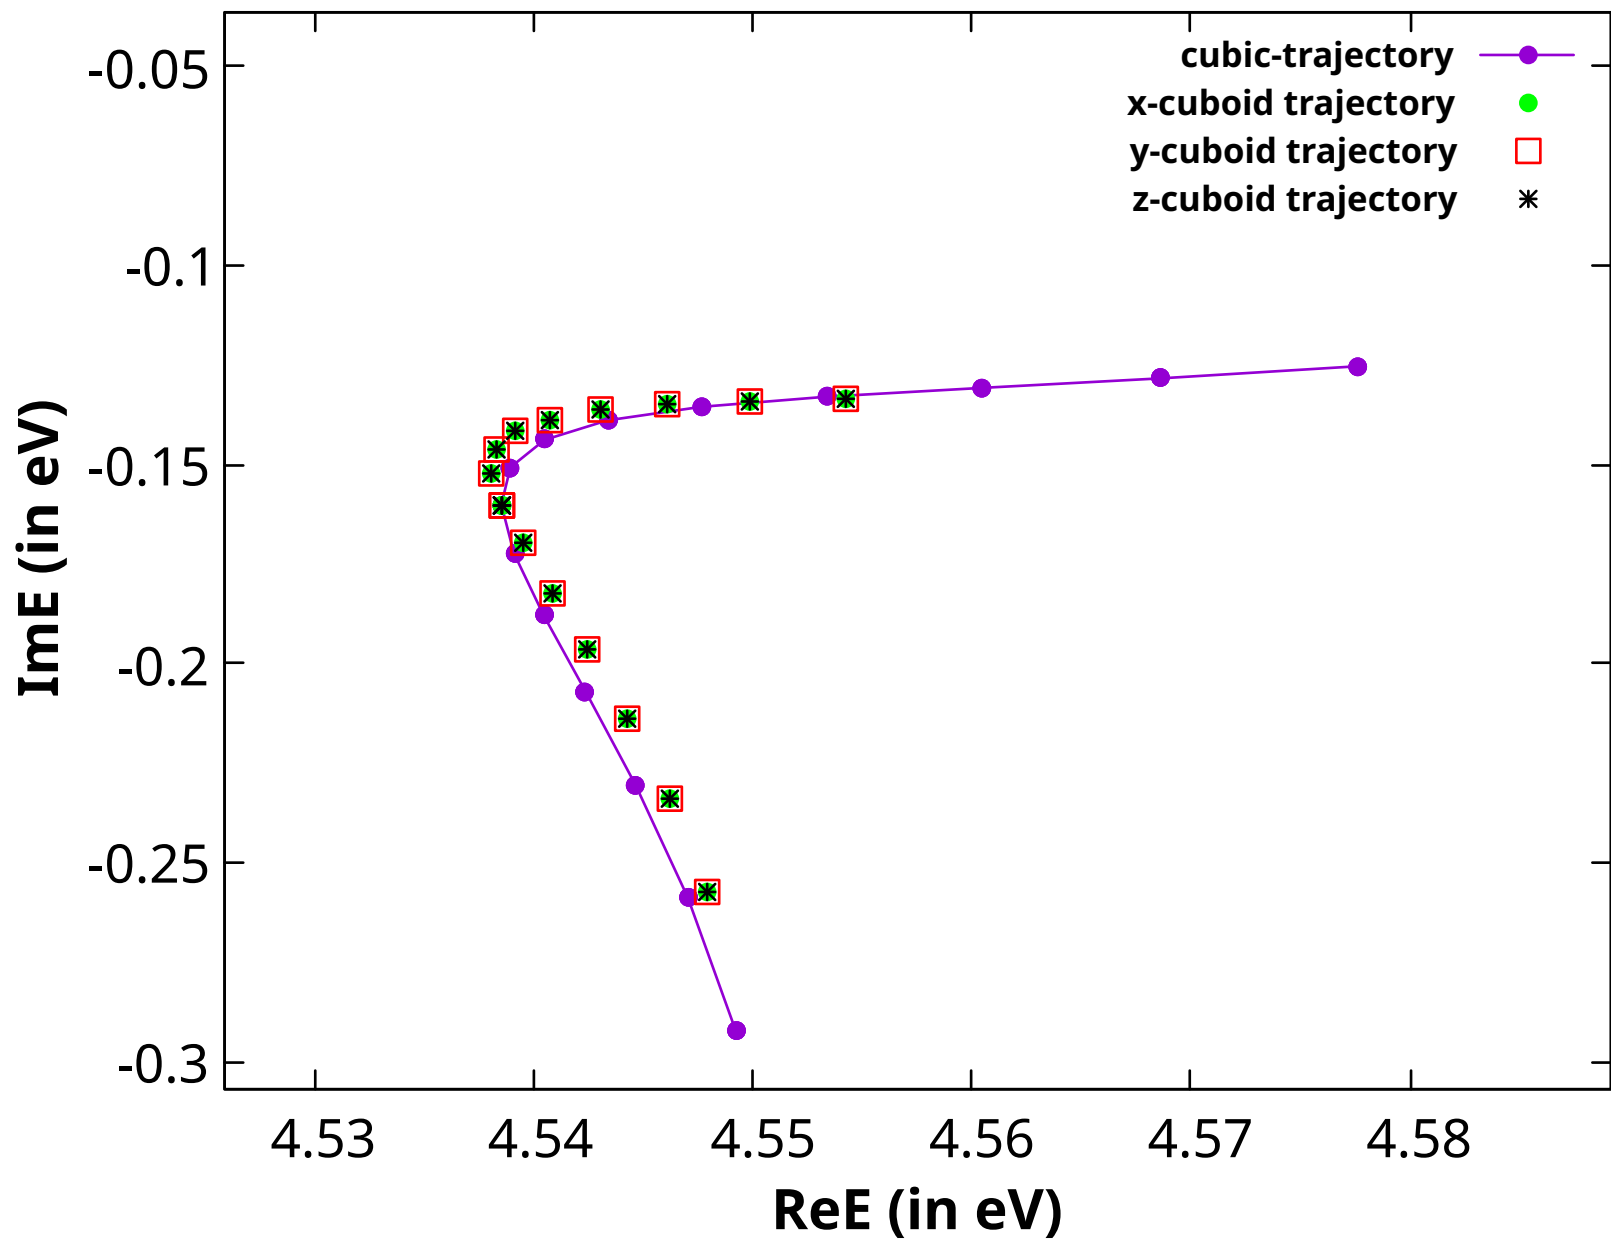

Supplement: d6cp01268j2.zip [file cuboid_tra.pdf › supp/SIH4/cuboid_tra.pdf]

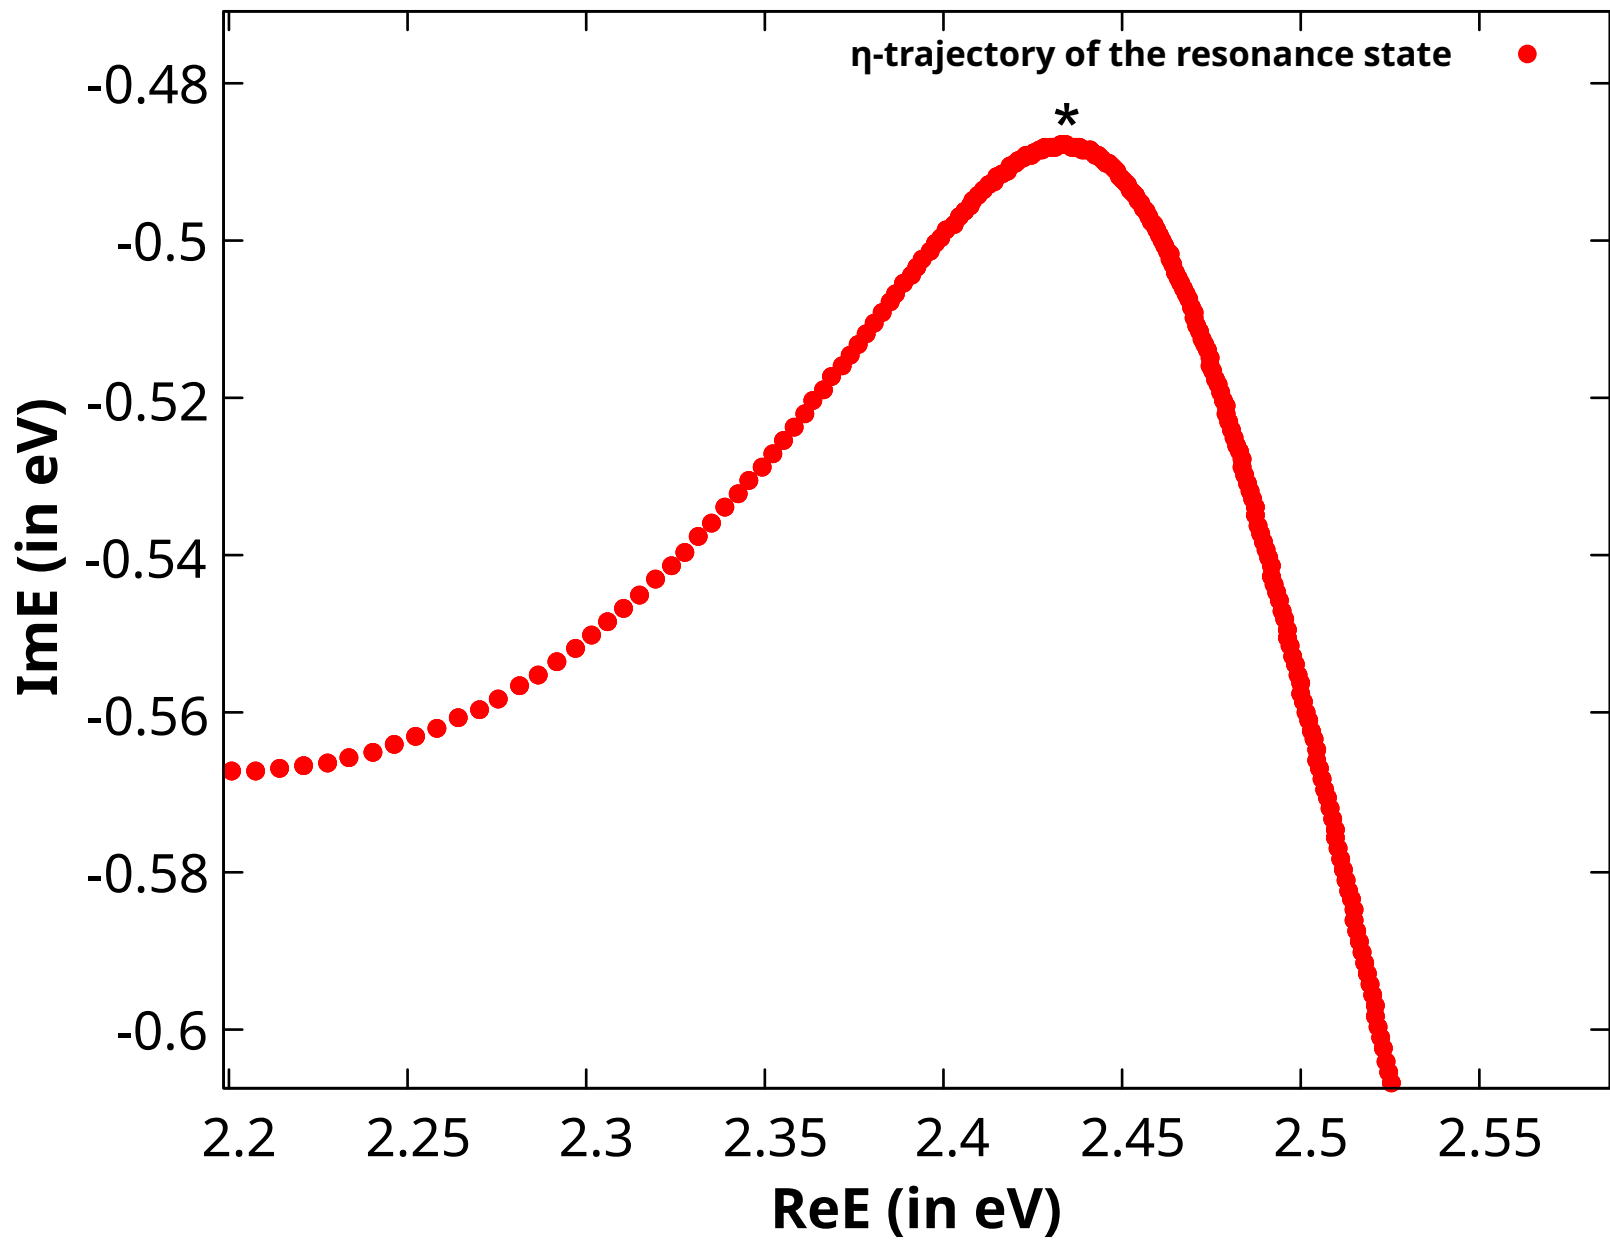

Supplement: d6cp01268j2.zip [file eta_aug_4p4d.pdf › supp/SIH4/eta_aug_4p4d.pdf]

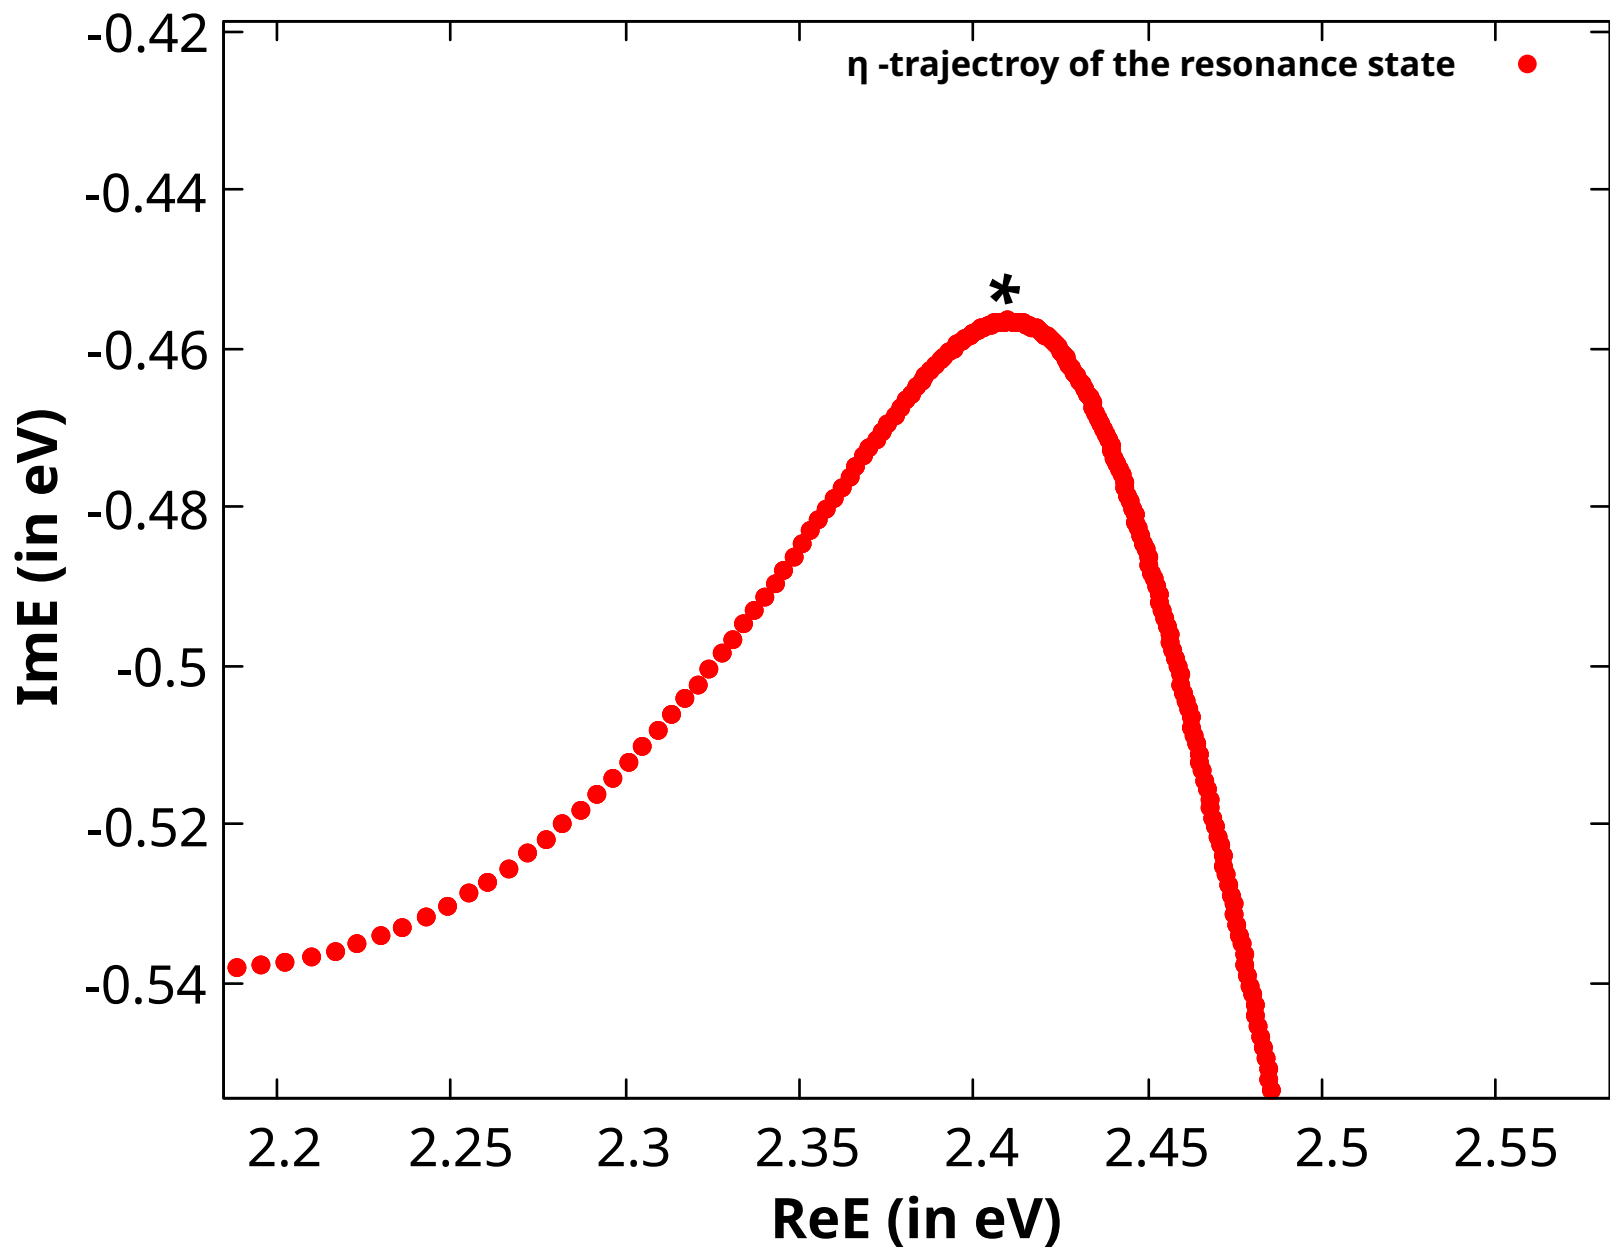

Supplement: d6cp01268j2.zip [file eta_aug_dz_4p4d.pdf › supp/SIH4/eta_aug_dz_4p4d.pdf]

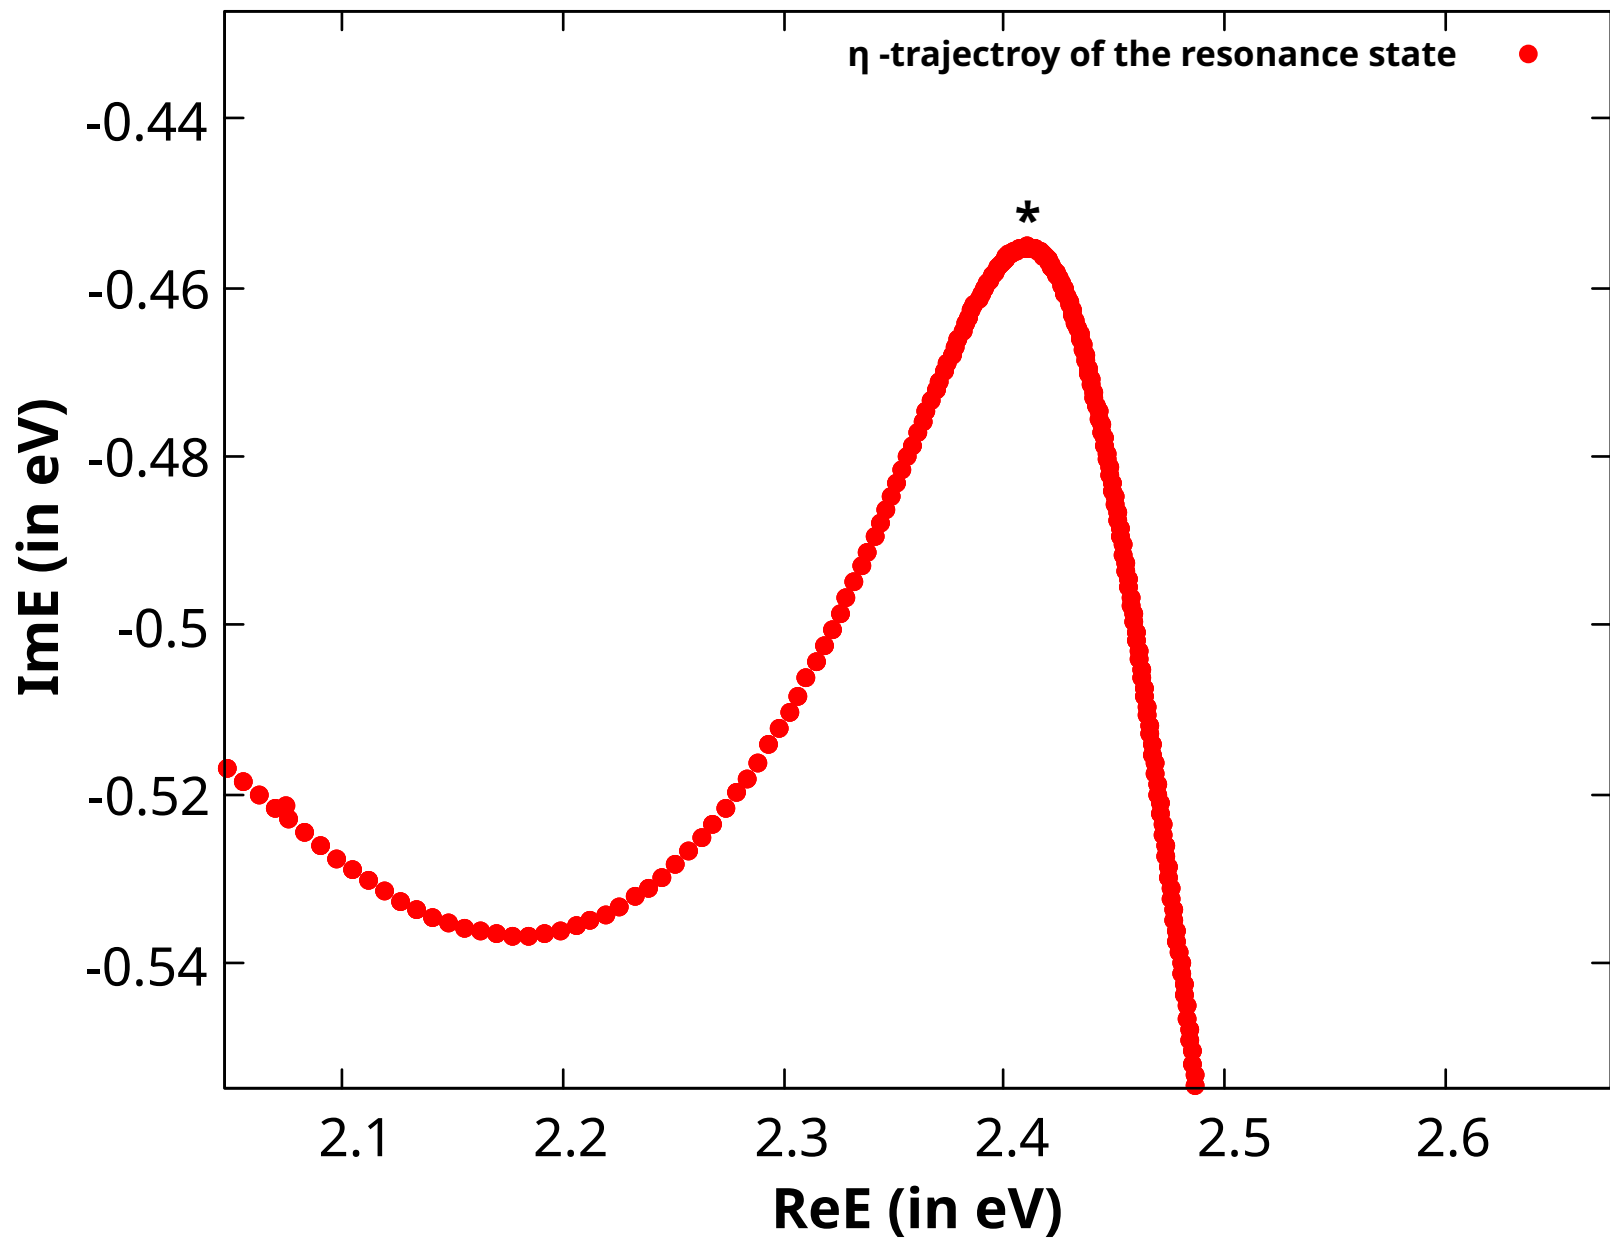

Supplement: d6cp01268j2.zip [file eta_aug_dz_5p4d.pdf › supp/SIH4/eta_aug_dz_5p4d.pdf]

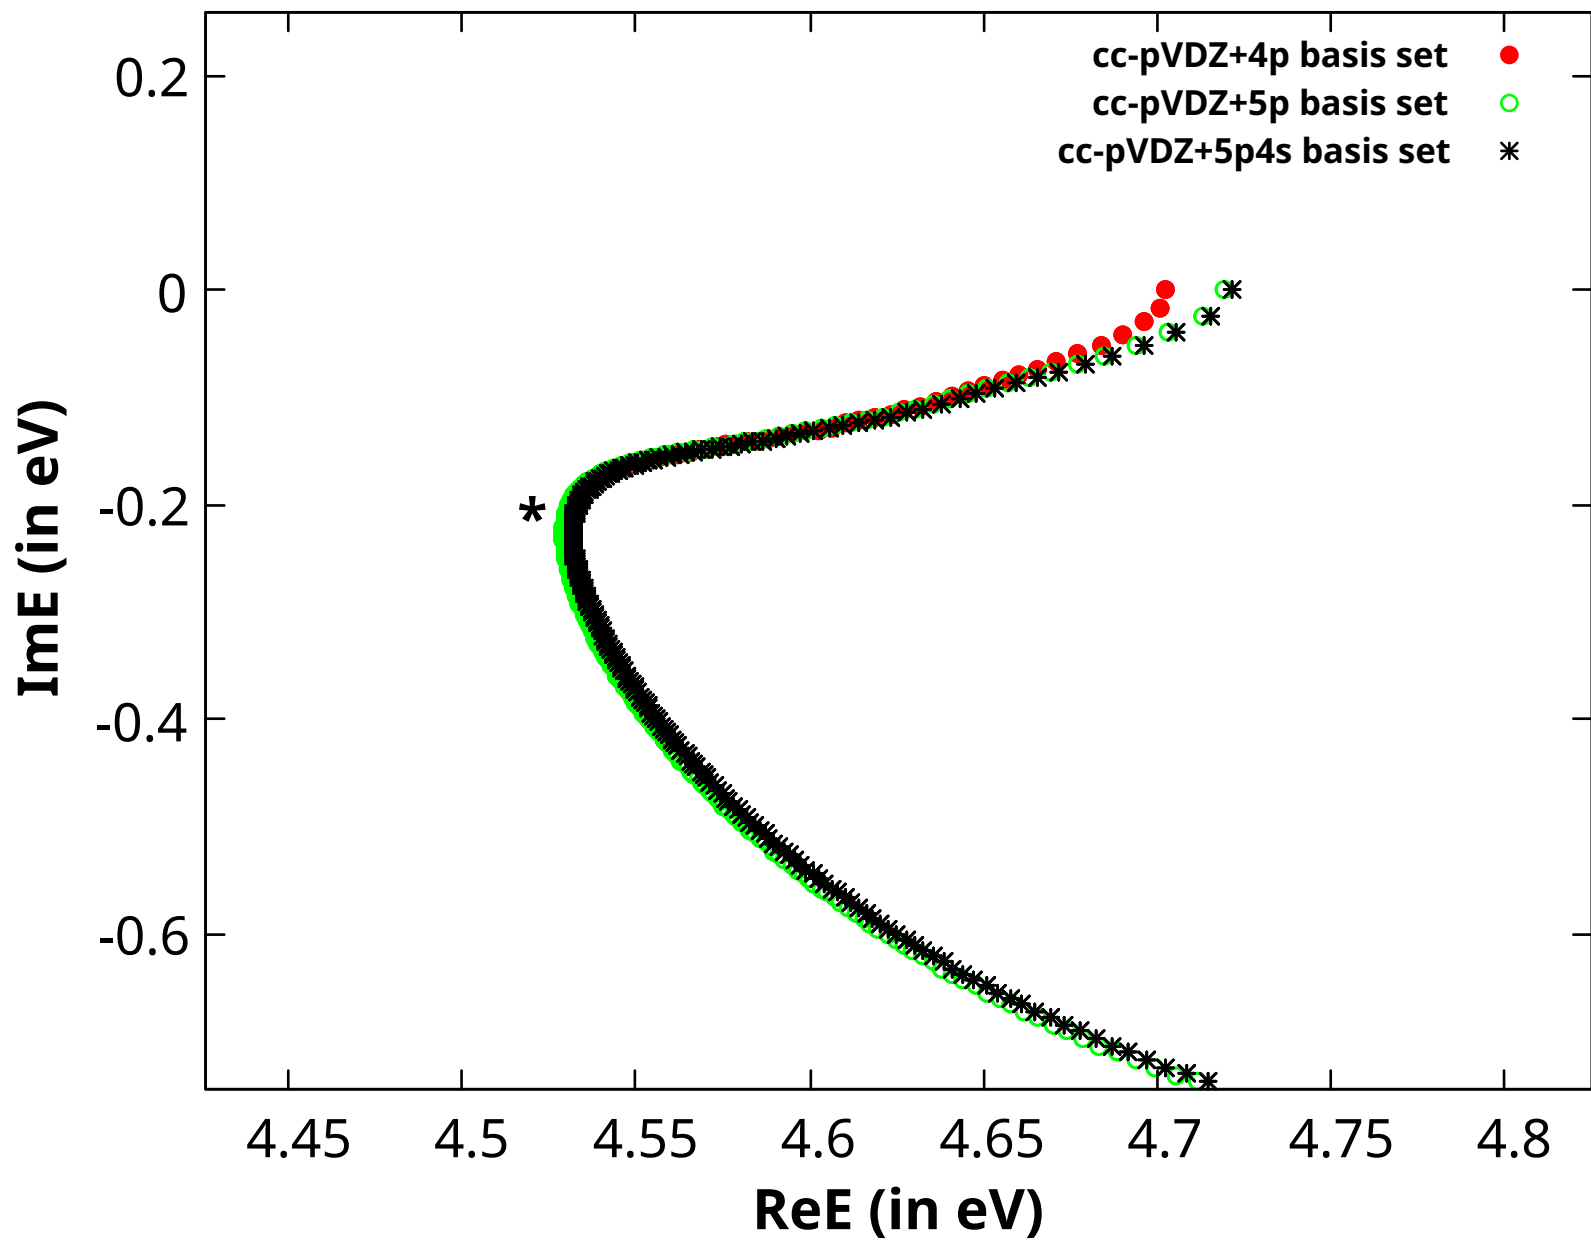

Supplement: d6cp01268j2.zip [file eta_ccpvdz+sp.pdf › supp/SIH4/eta_ccpvdz+sp.pdf]

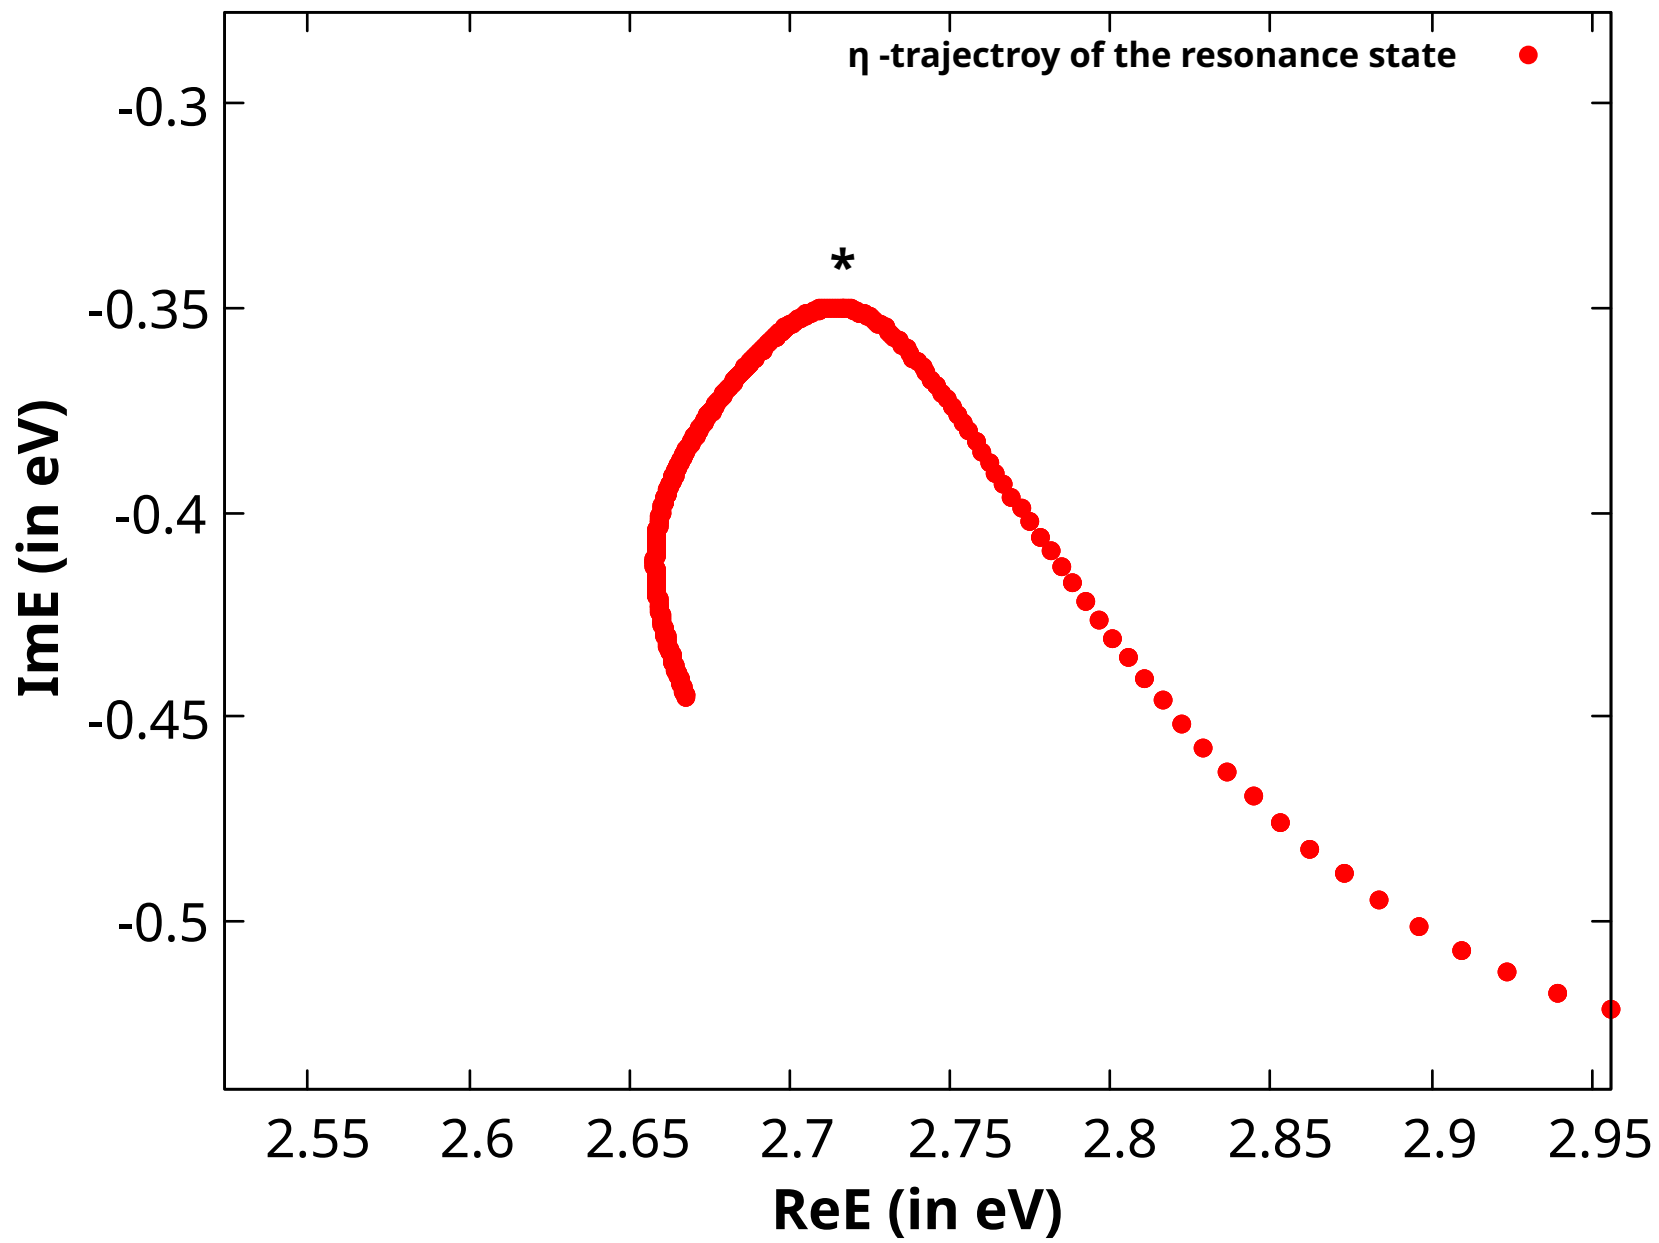

Supplement: d6cp01268j2.zip [file eta_dz_5p4d.pdf › supp/SIH4/eta_dz_5p4d.pdf]

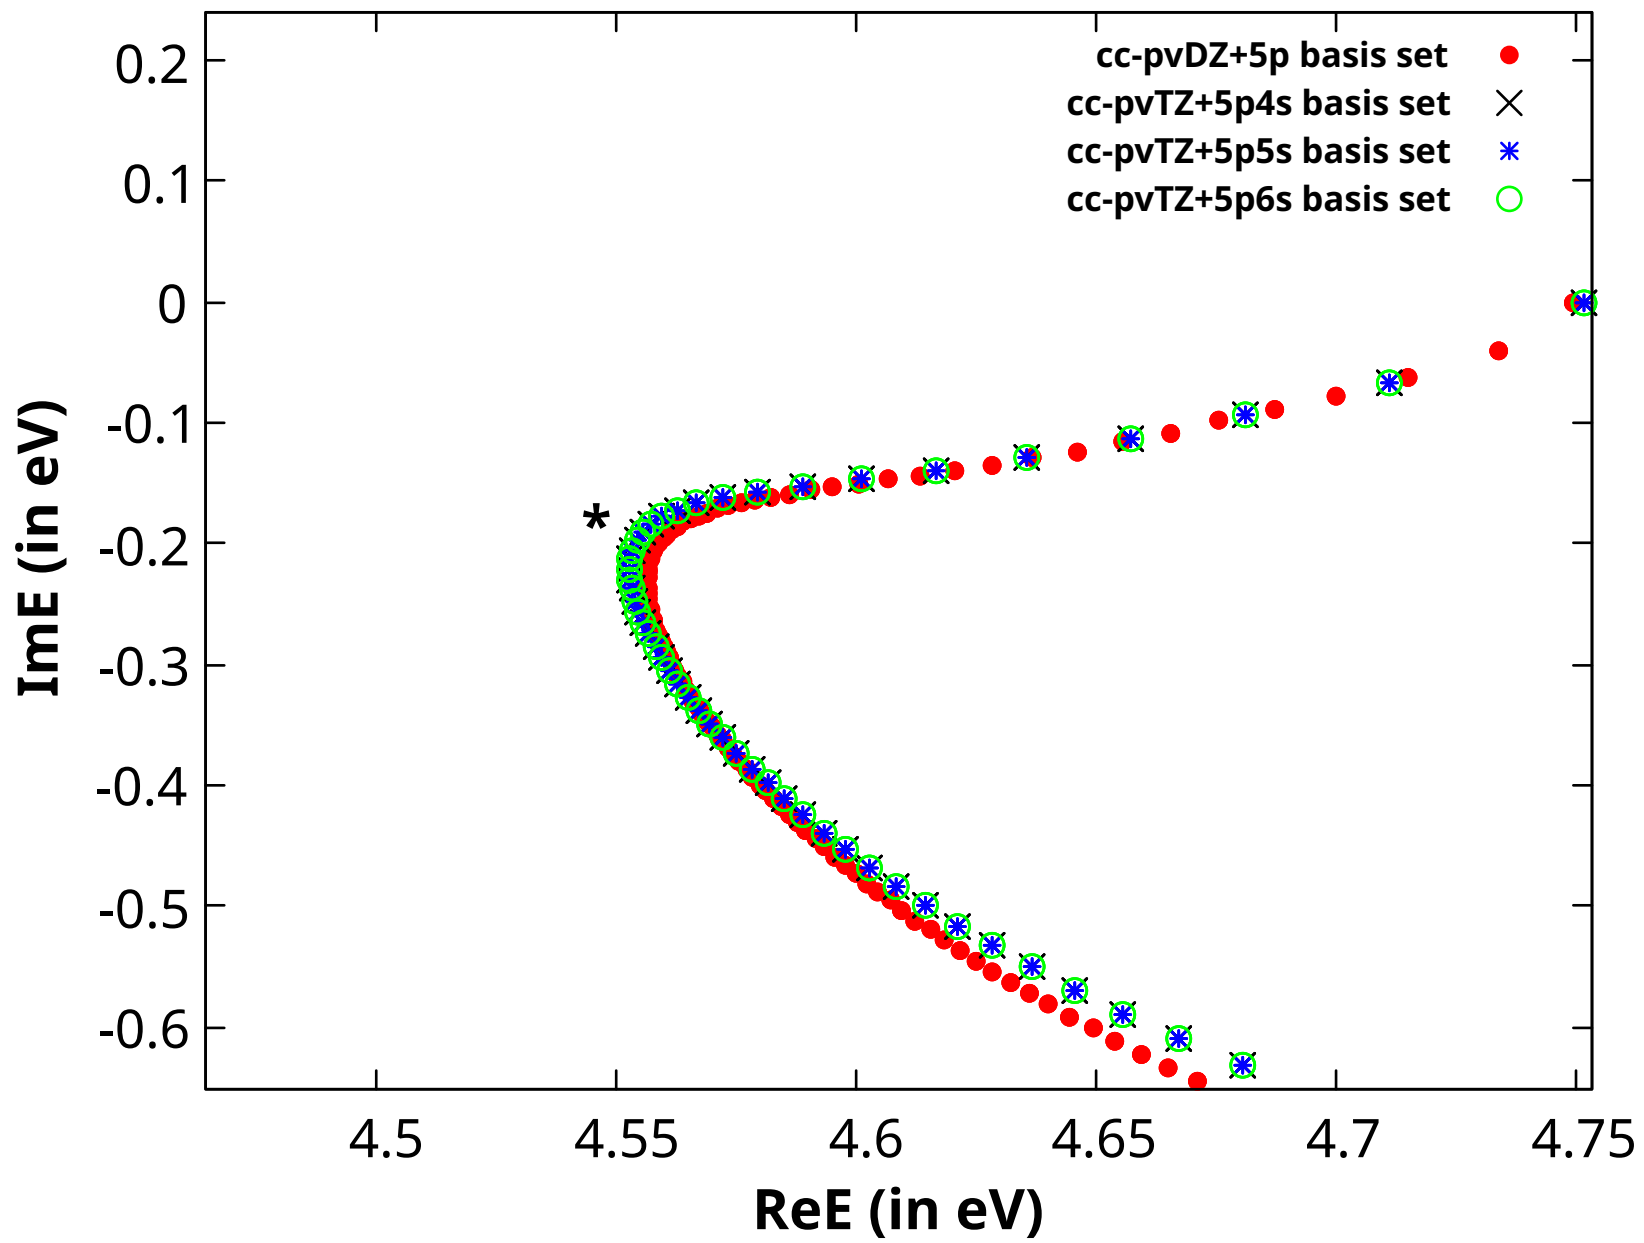

Supplement: d6cp01268j2.zip [file eta_sih4_2.pdf › supp/SIH4/eta_sih4_2.pdf]

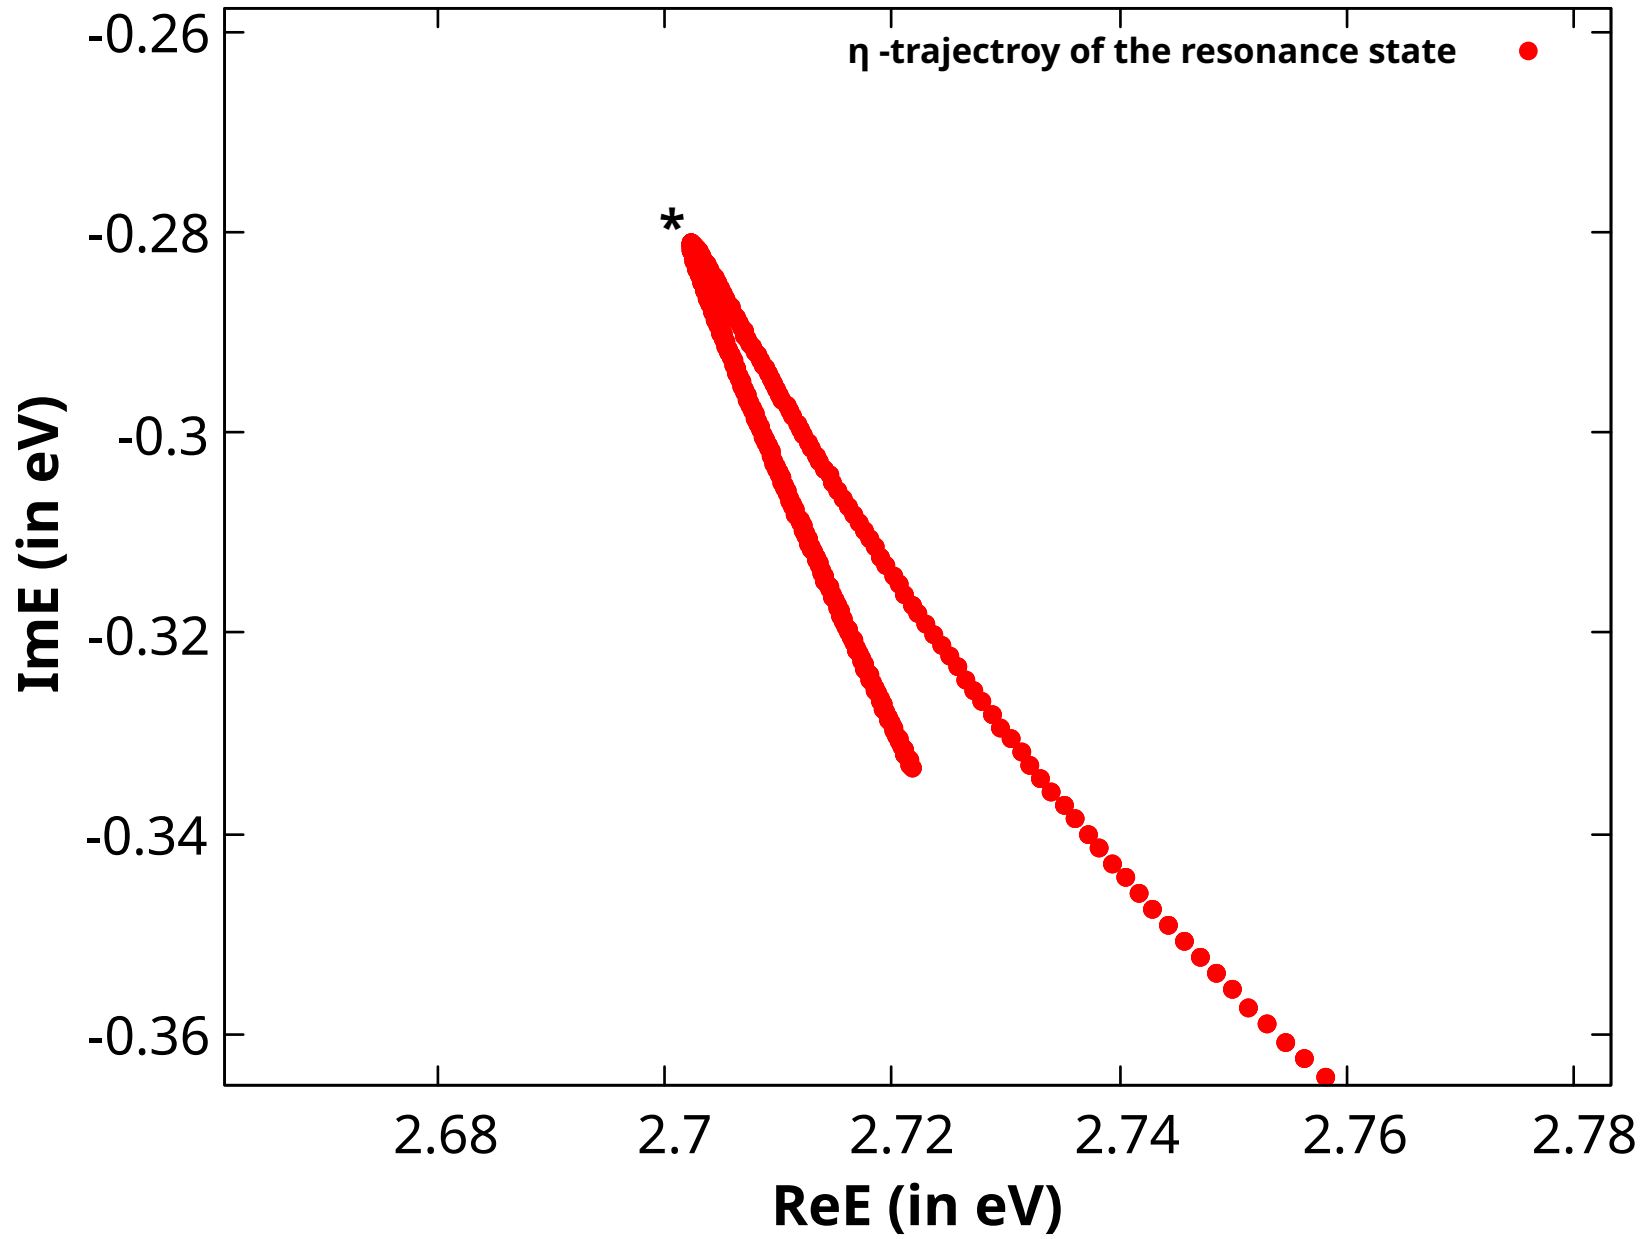

Supplement: d6cp01268j2.zip [file eta_tz_5p4d.pdf › supp/SIH4/eta_tz_5p4d.pdf]

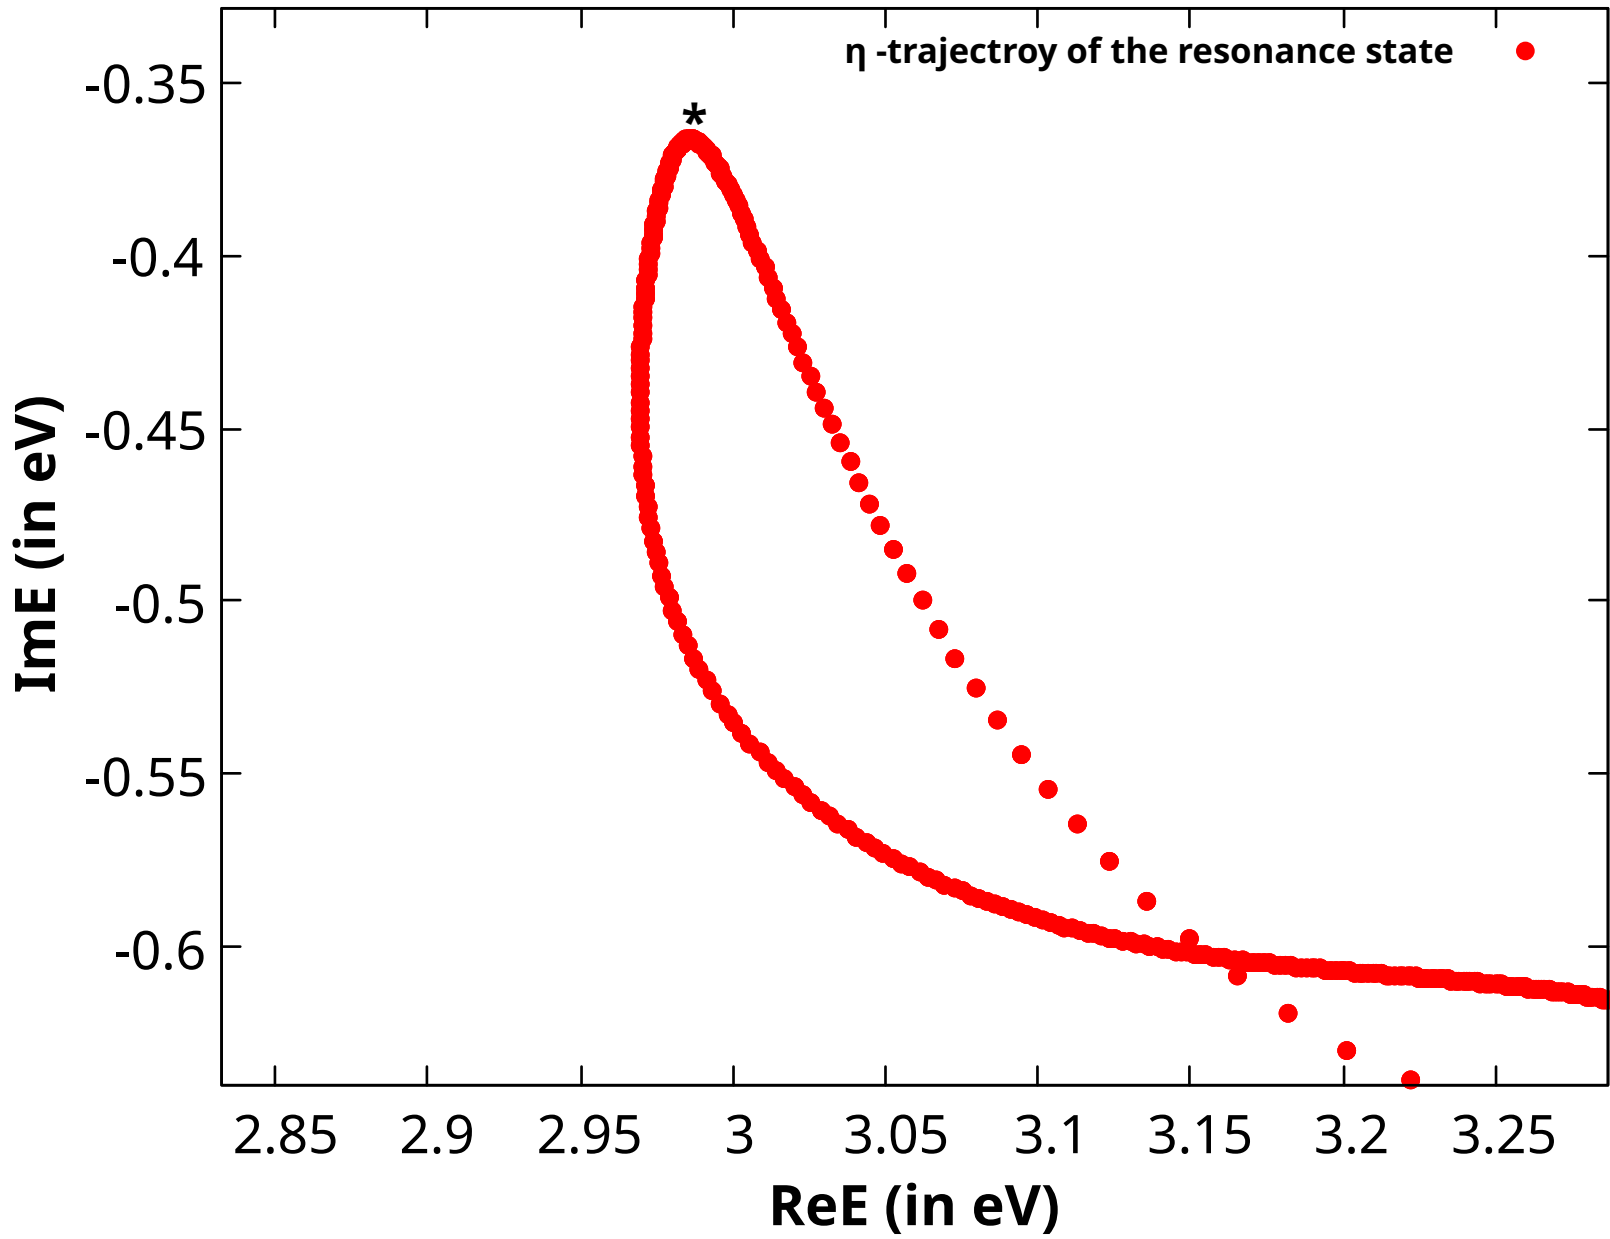

Supplement: d6cp01268j2.zip [file eta_tz_5p4d4f.pdf › supp/SIH4/eta_tz_5p4d4f.pdf]

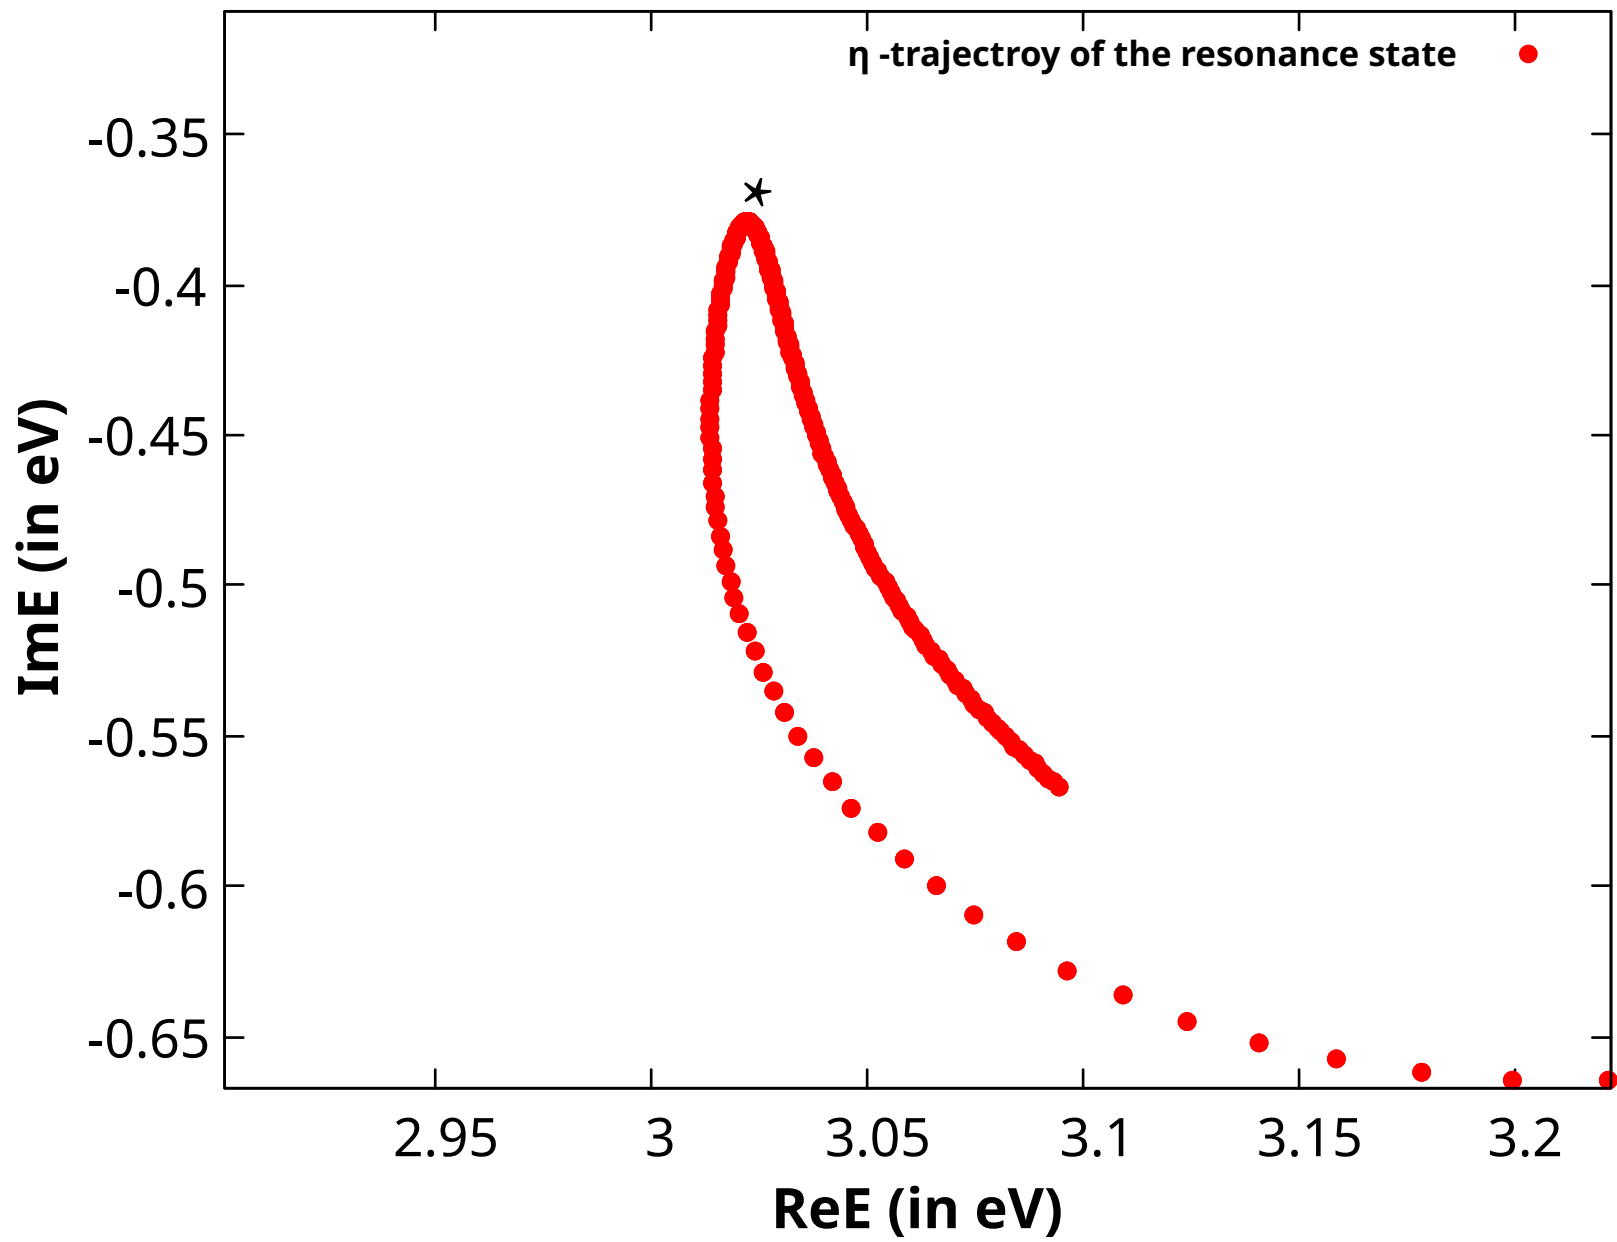

Supplement: d6cp01268j2.zip [file eta_tz_5p4d5f.pdf › supp/SIH4/eta_tz_5p4d5f.pdf]

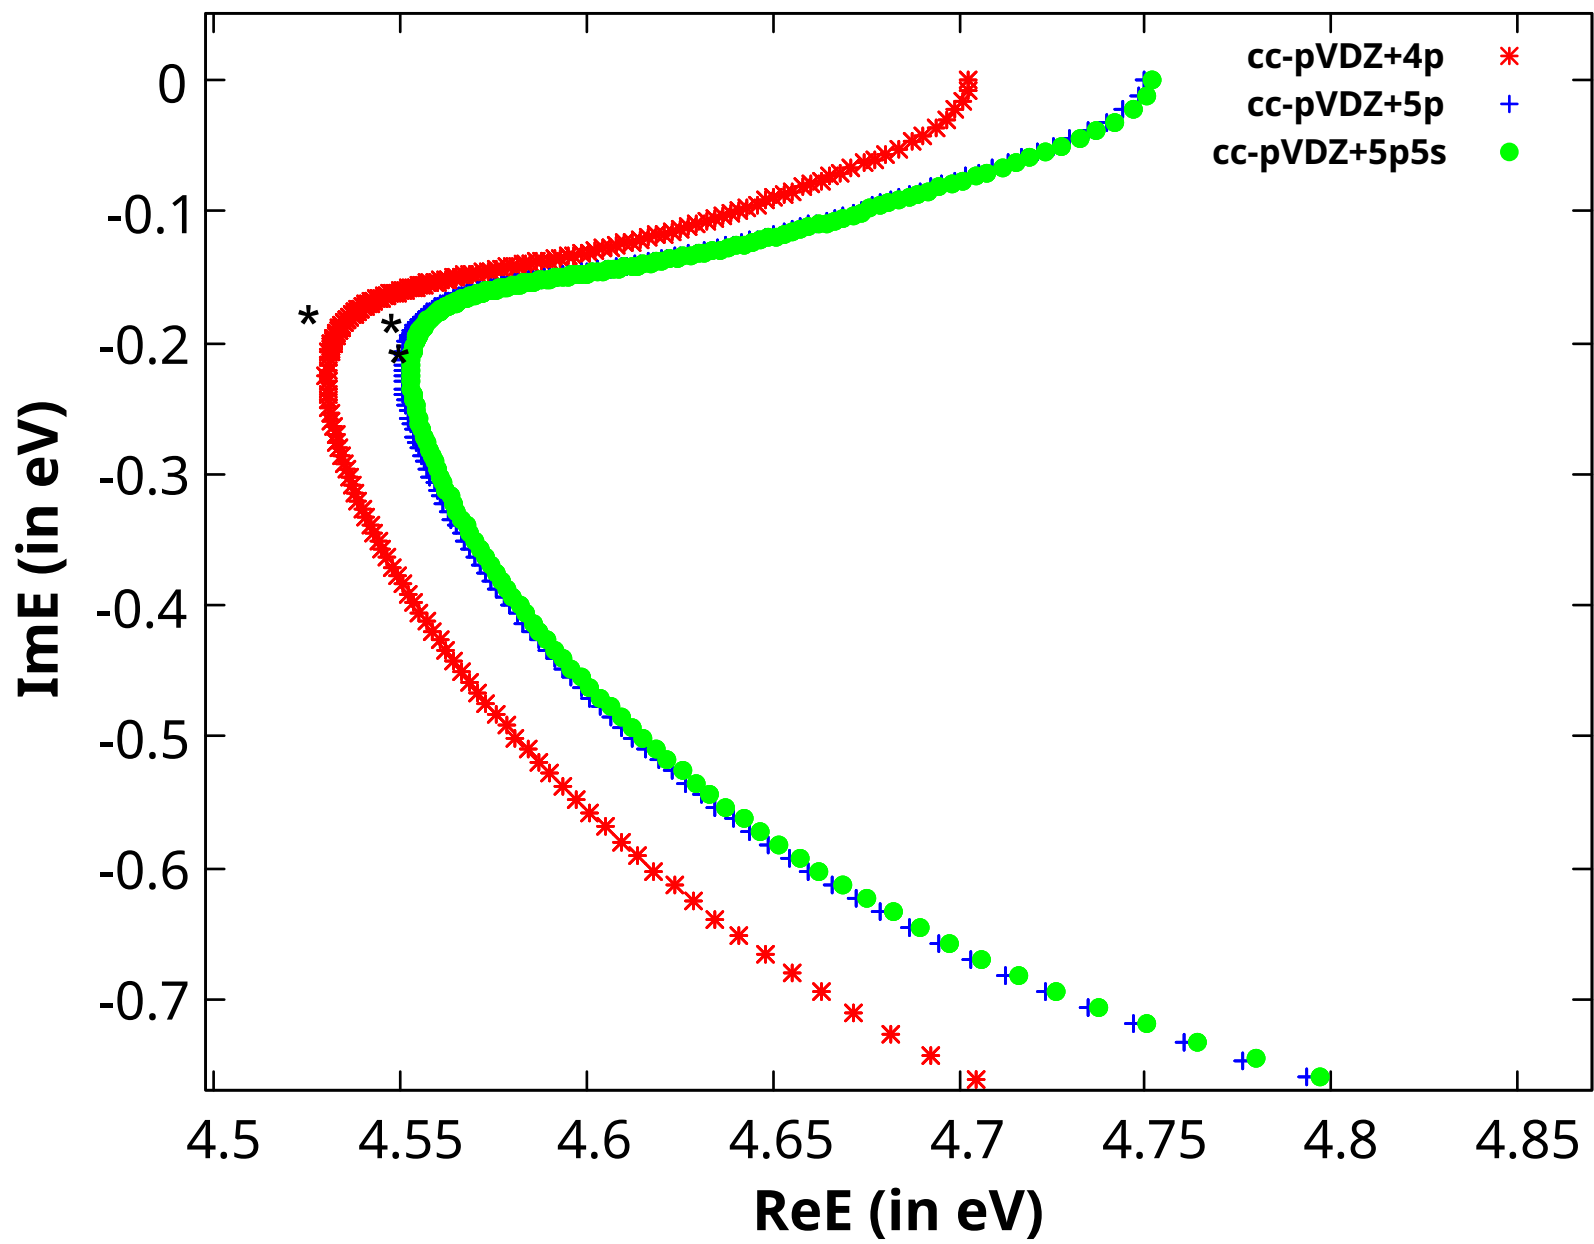

Supplement: d6cp01268j2.zip [file sih4_4p.pdf › supp/SIH4/sih4_4p.pdf]

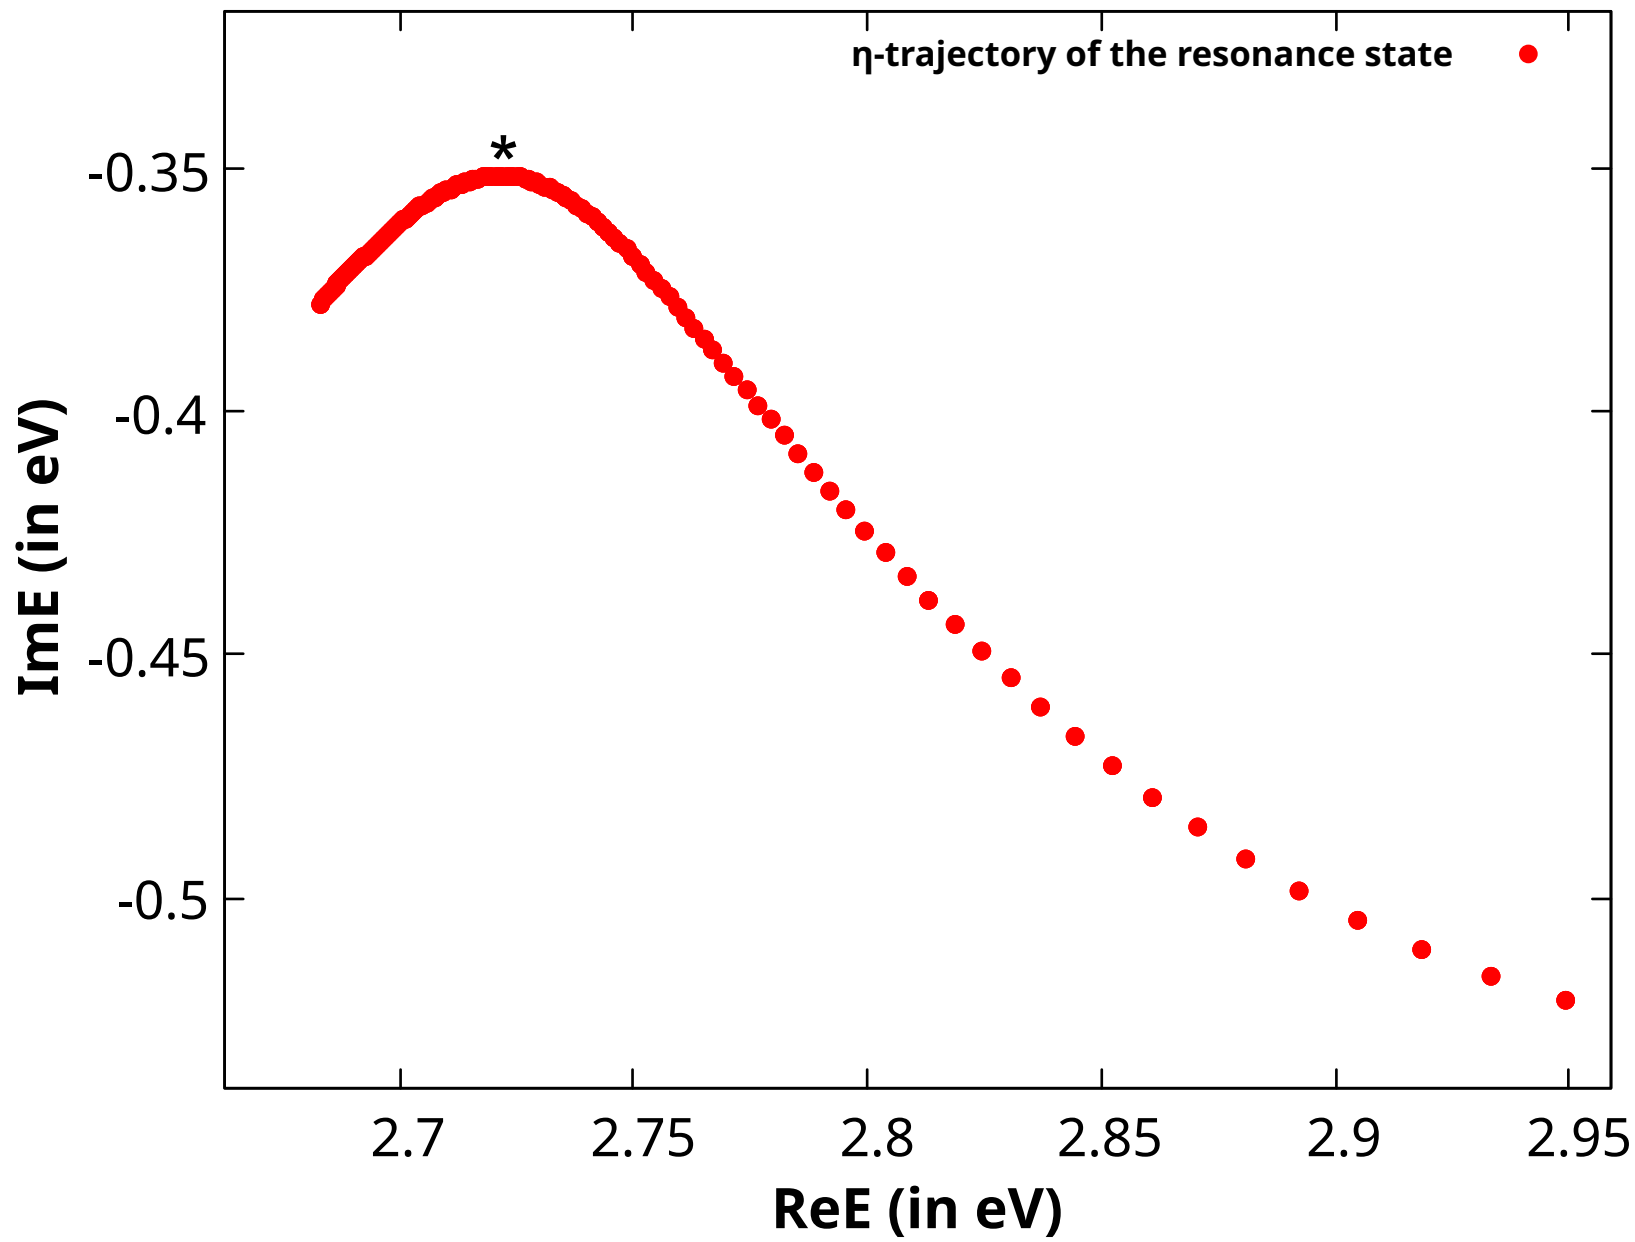

Supplement: d6cp01268j2.zip [file sih4_5p4d_dz.pdf › supp/SIH4/sih4_5p4d_dz.pdf]

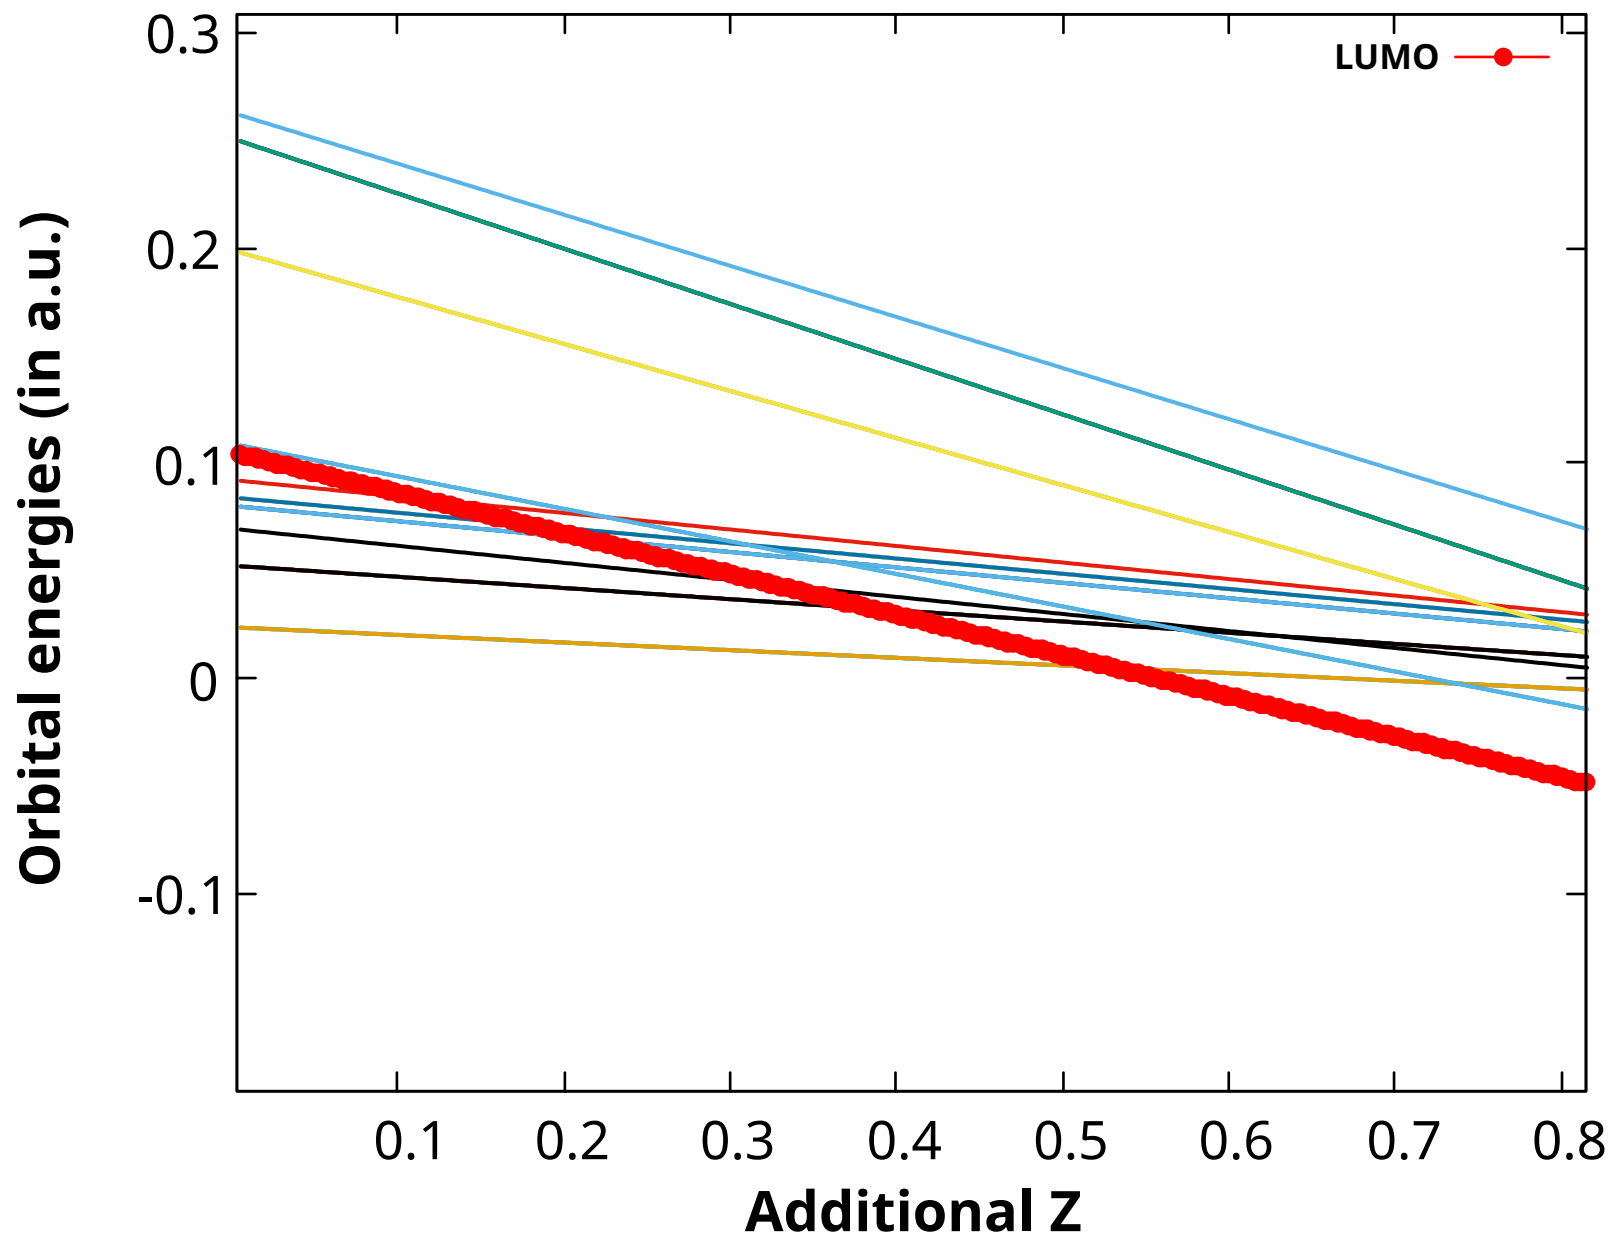

Supplement: d6cp01268j2.zip [file sih4_5p4d_dz_charge.pdf › supp/SIH4/sih4_5p4d_dz_charge.pdf]

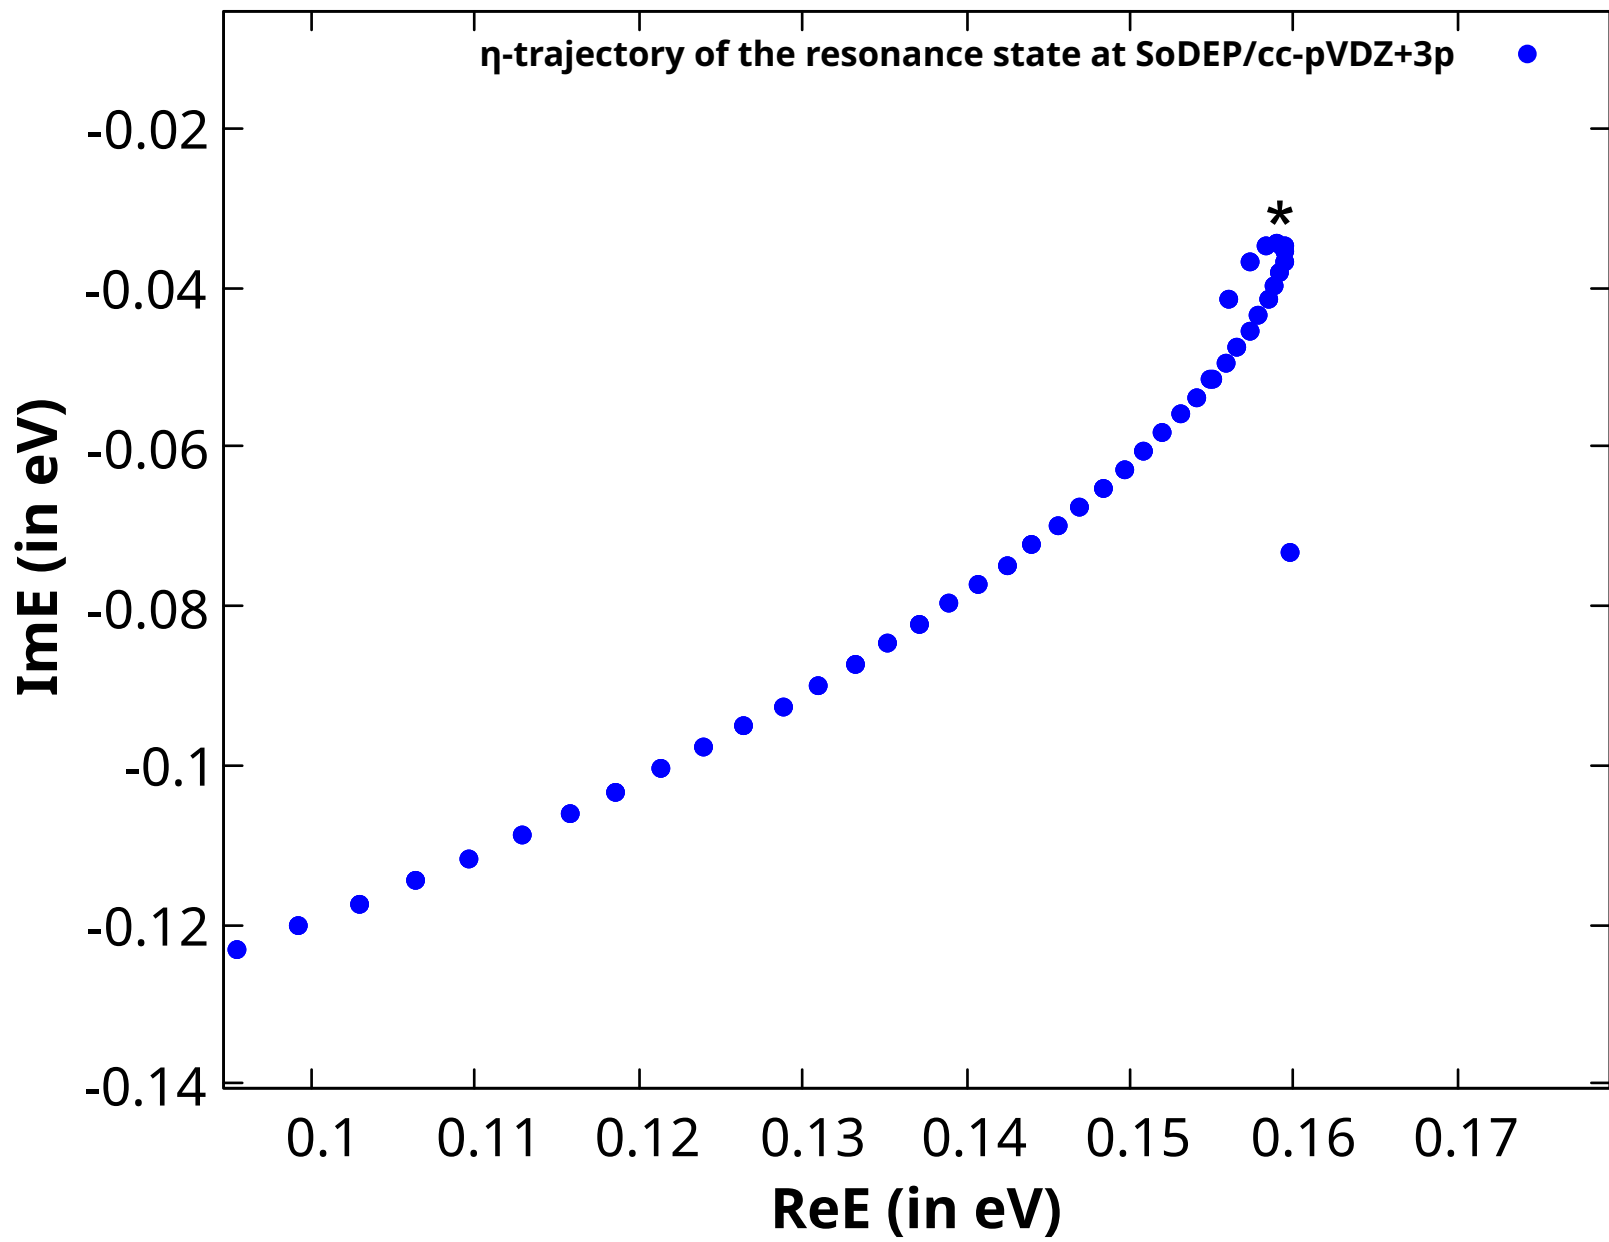

Supplement: d6cp01268j2.zip [file sodep_supp_3p.pdf › supp/SIH4/sodep_supp_3p.pdf]

ImE (in eV)

$\eta$ -trajectory of the resonance state at ToDEP/cc-pVDZ+3p

ReE (in eV)

\*

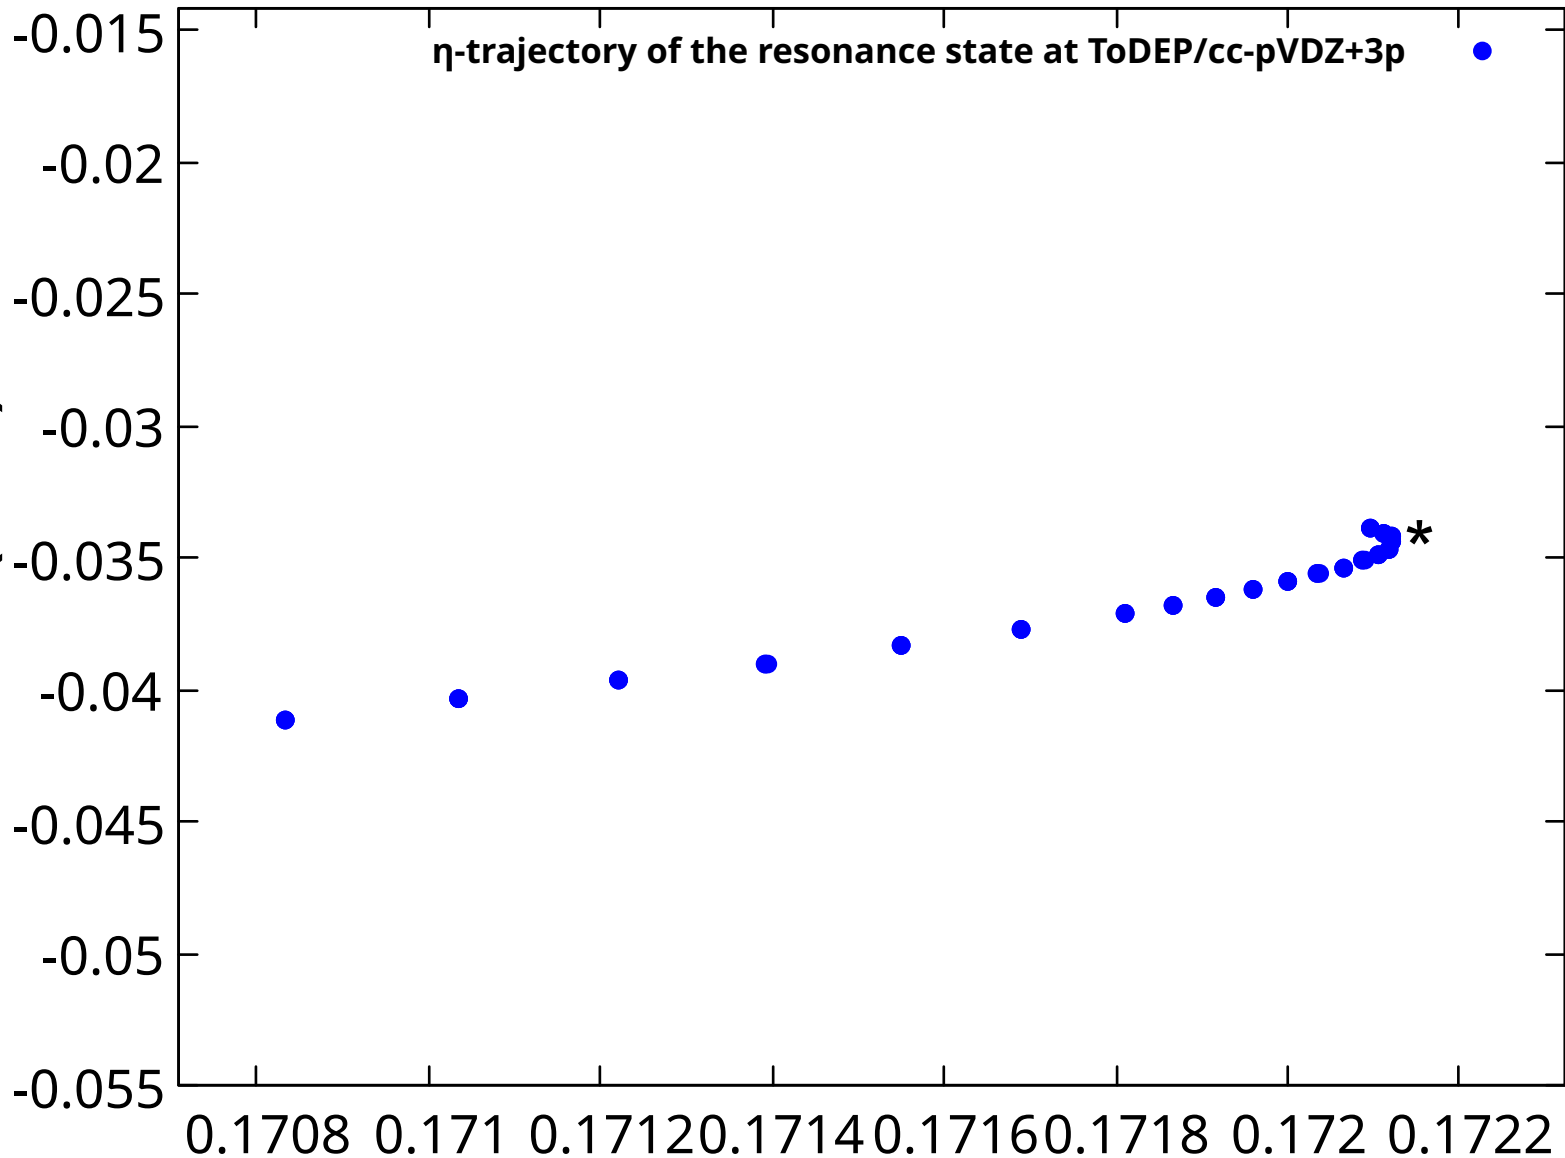

Supplement: d6cp01268j2.zip [file todep_supp_3p.pdf › supp/SIH4/todep_supp_3p.pdf]

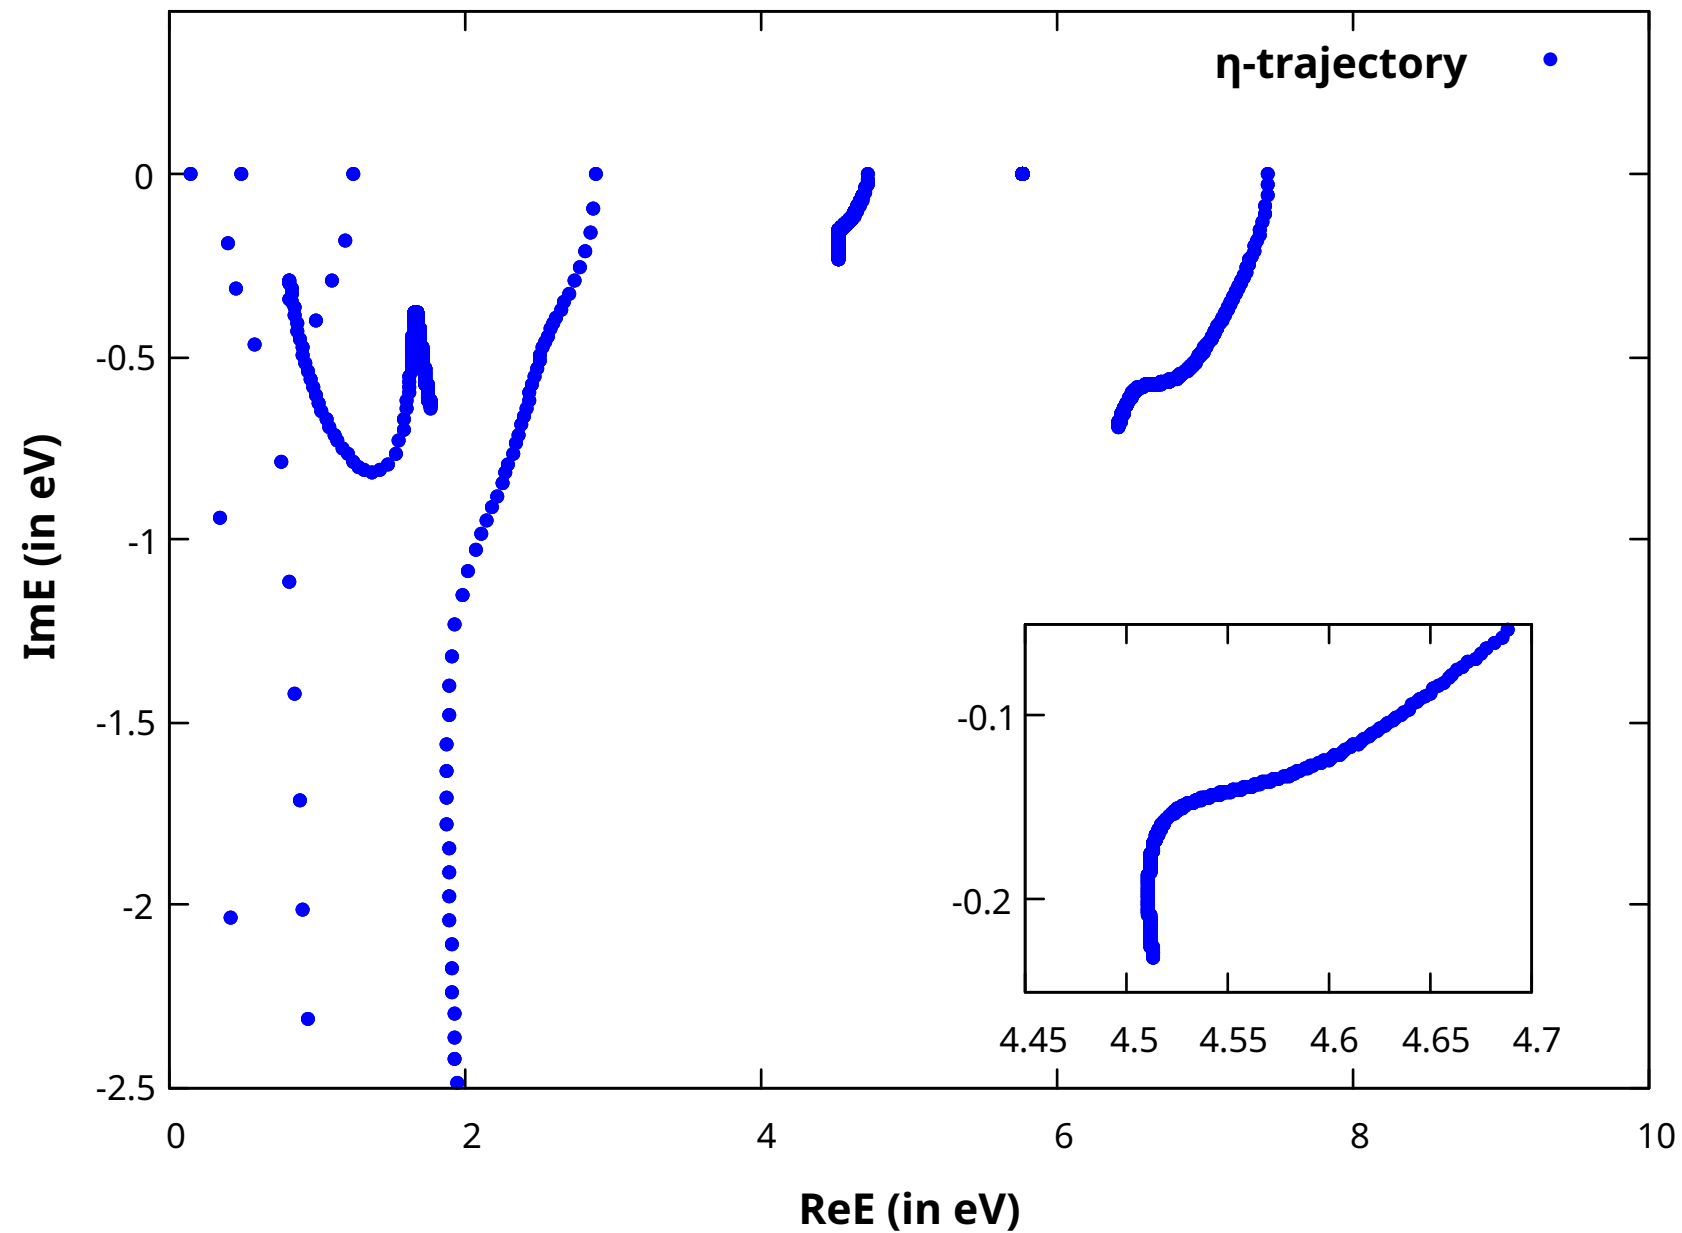

Supplement: d6cp01268j2.zip [file trial_box.pdf › supp/SIH4/trial_box.pdf]

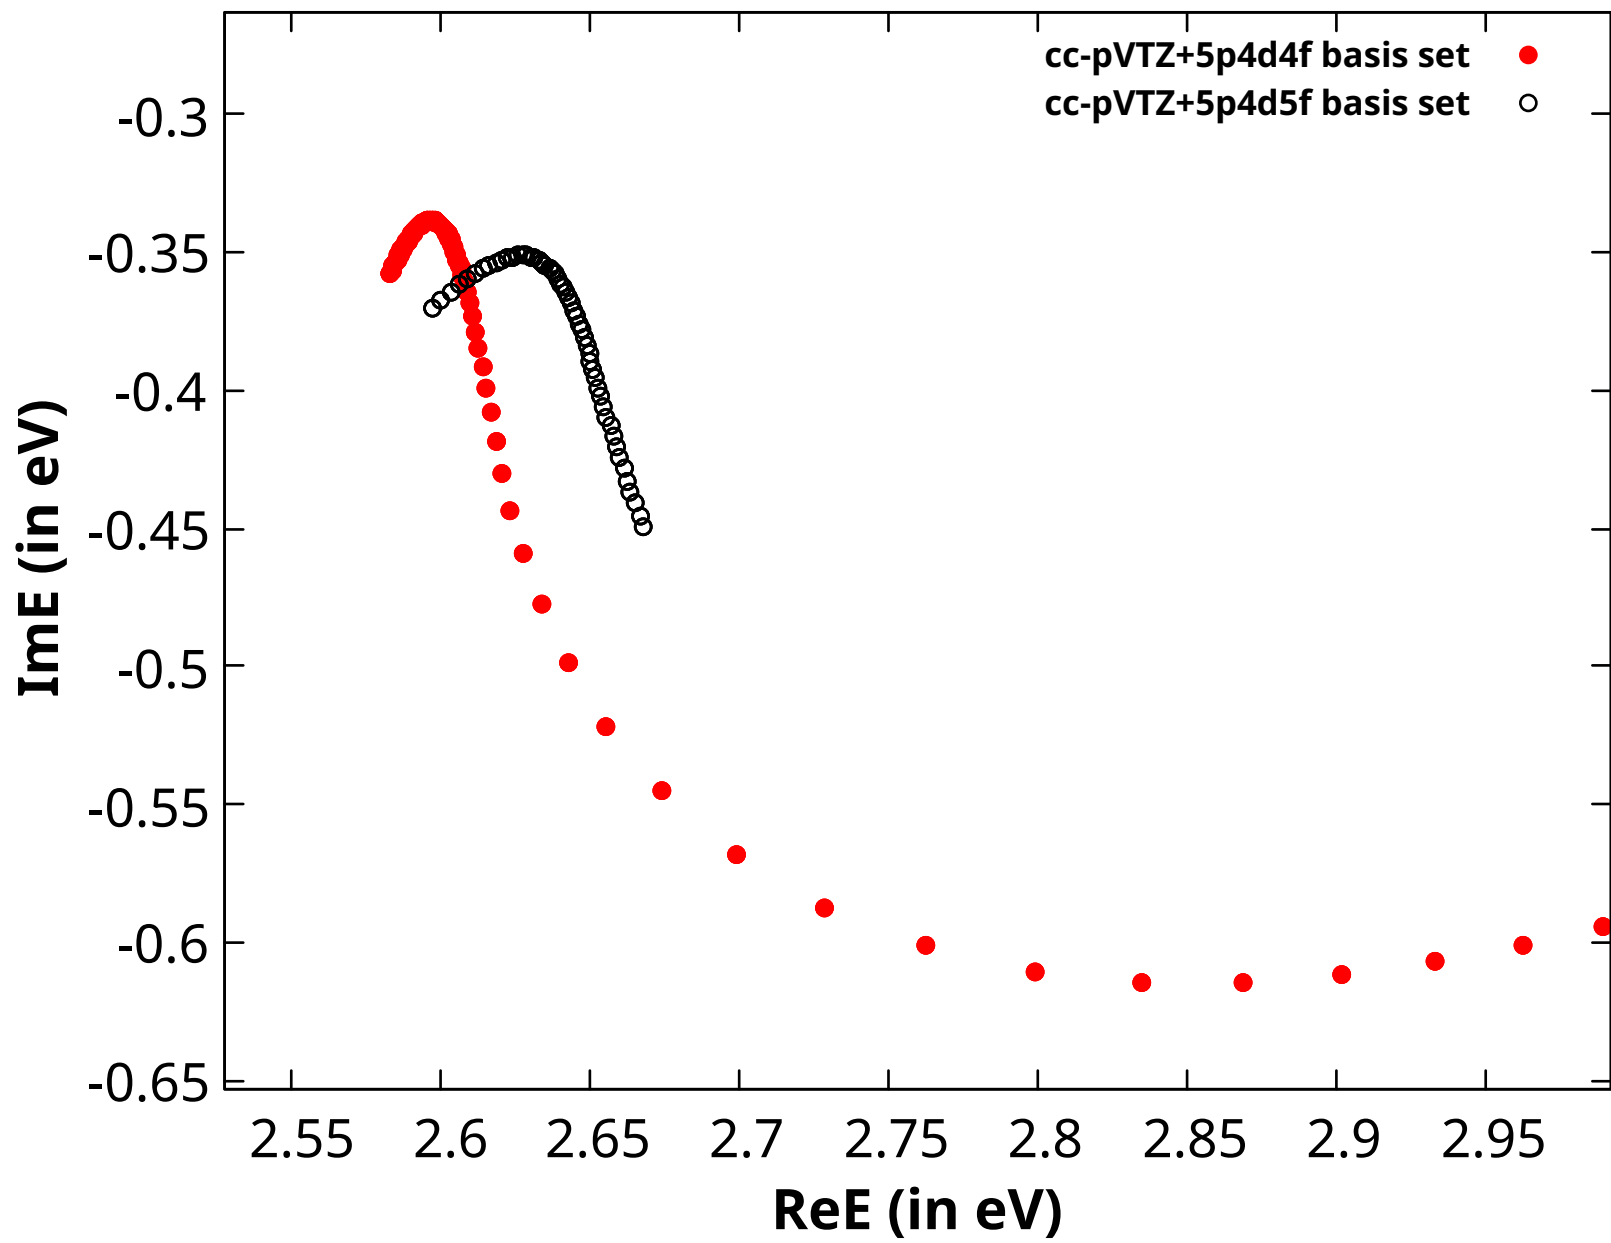

Supplement: d6cp01268j2.zip [file sih4_4f5f.pdf › supp/extra/sih4_4f5f.pdf]

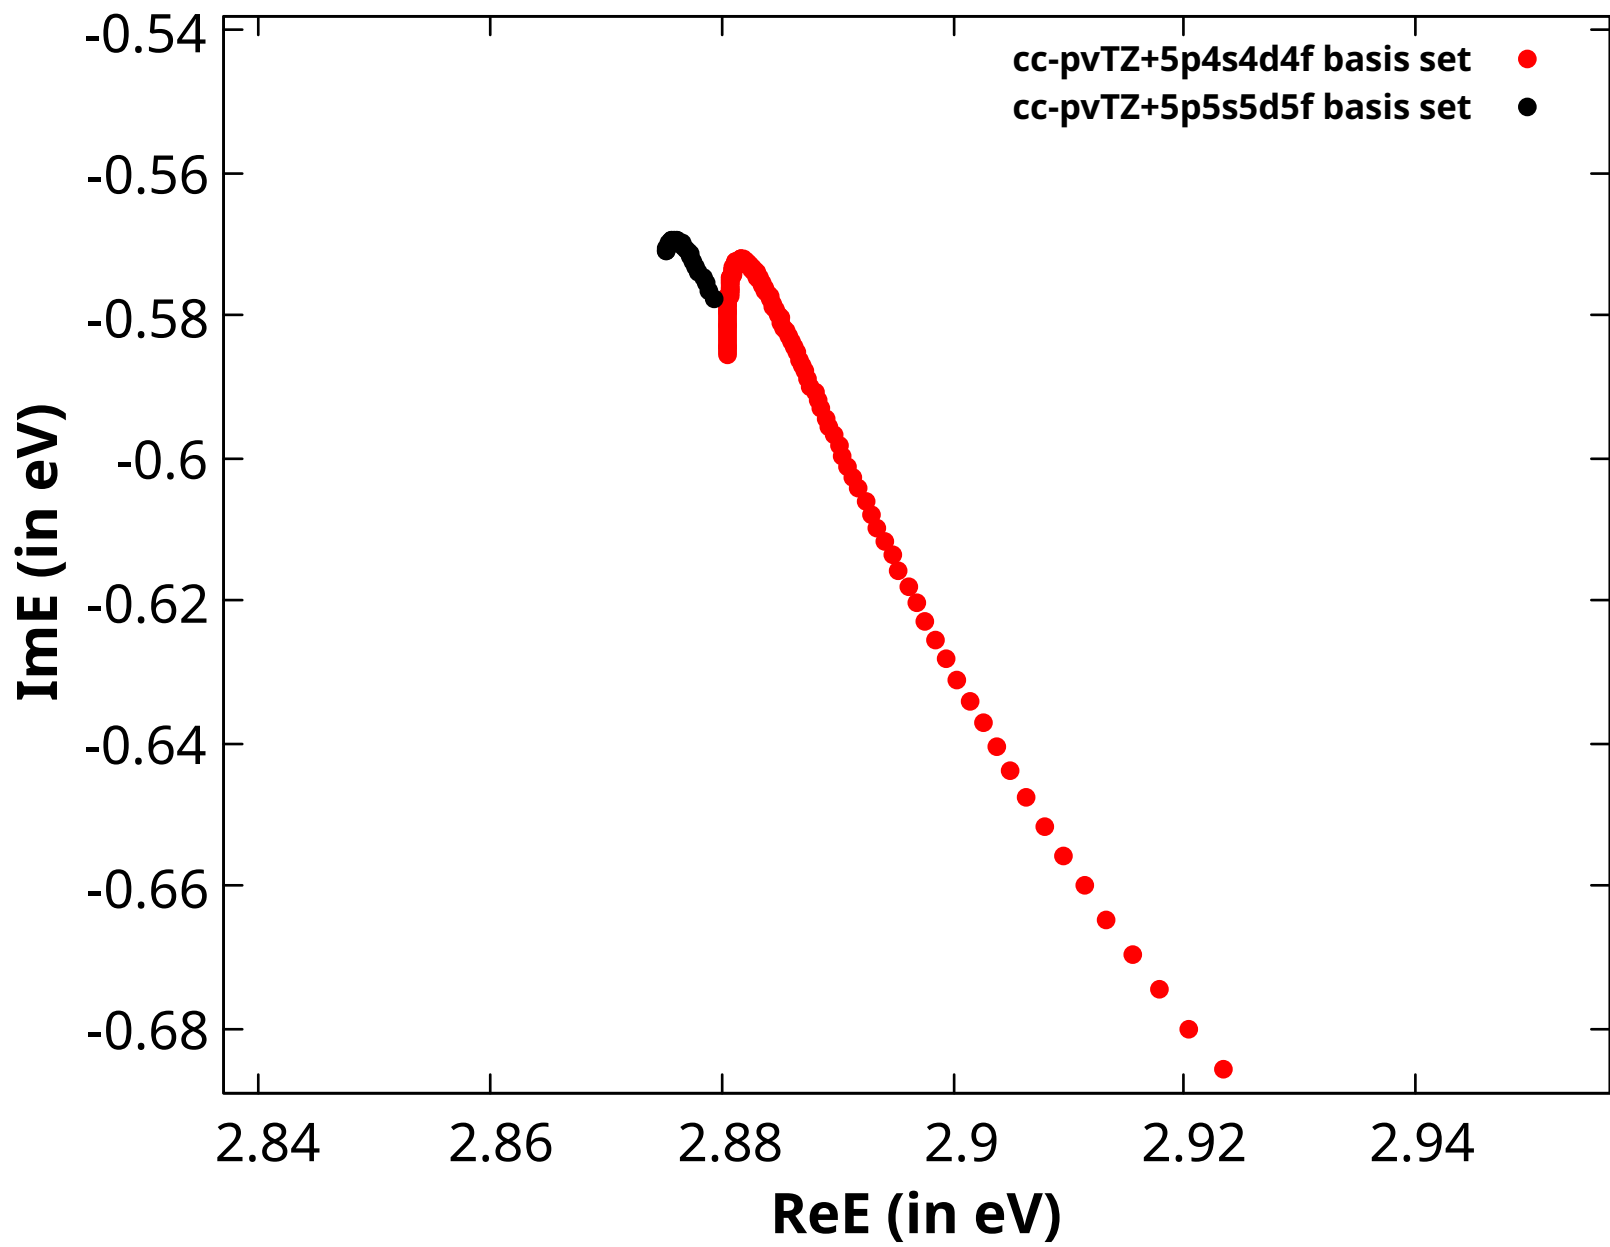

Supplement: d6cp01268j2.zip [file sodep_sif2h2.pdf › supp/extra/sodep_sif2h2.pdf]

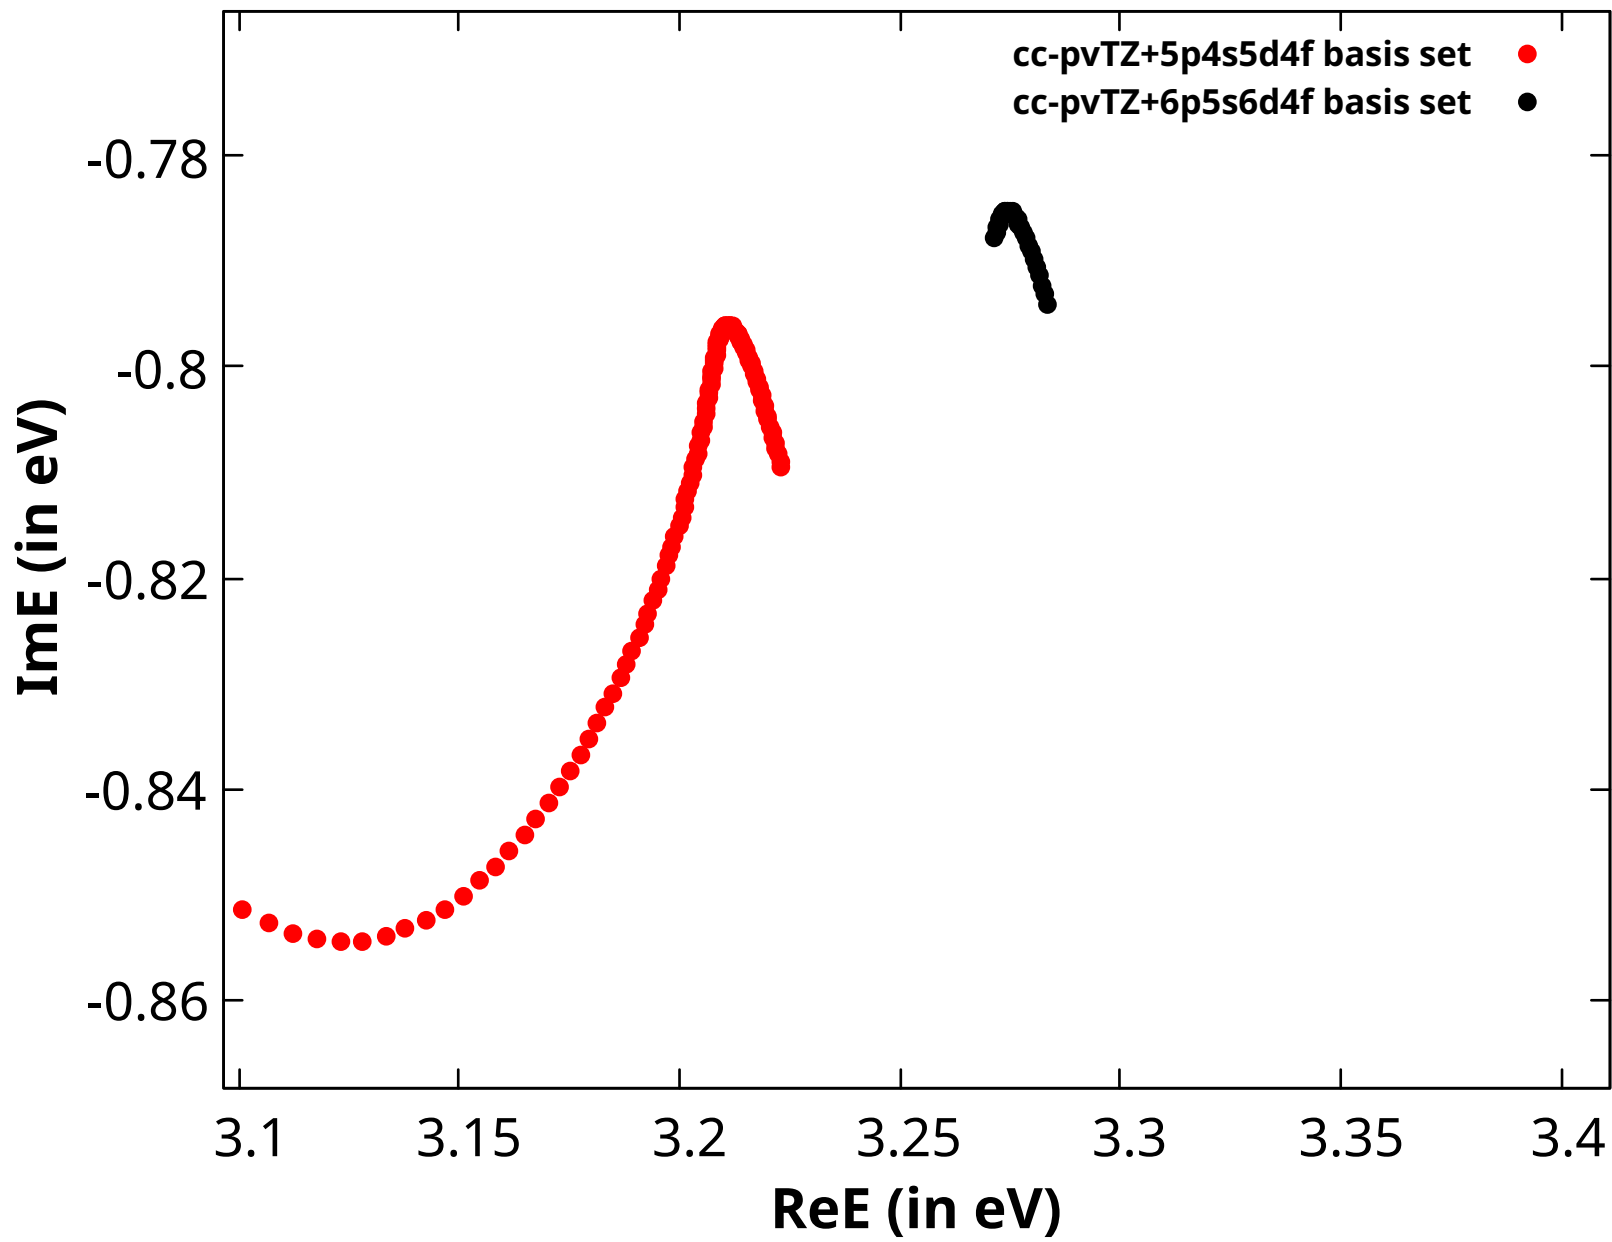

Supplement: d6cp01268j2.zip [file sodep_sif3.pdf › supp/extra/sodep_sif3.pdf]

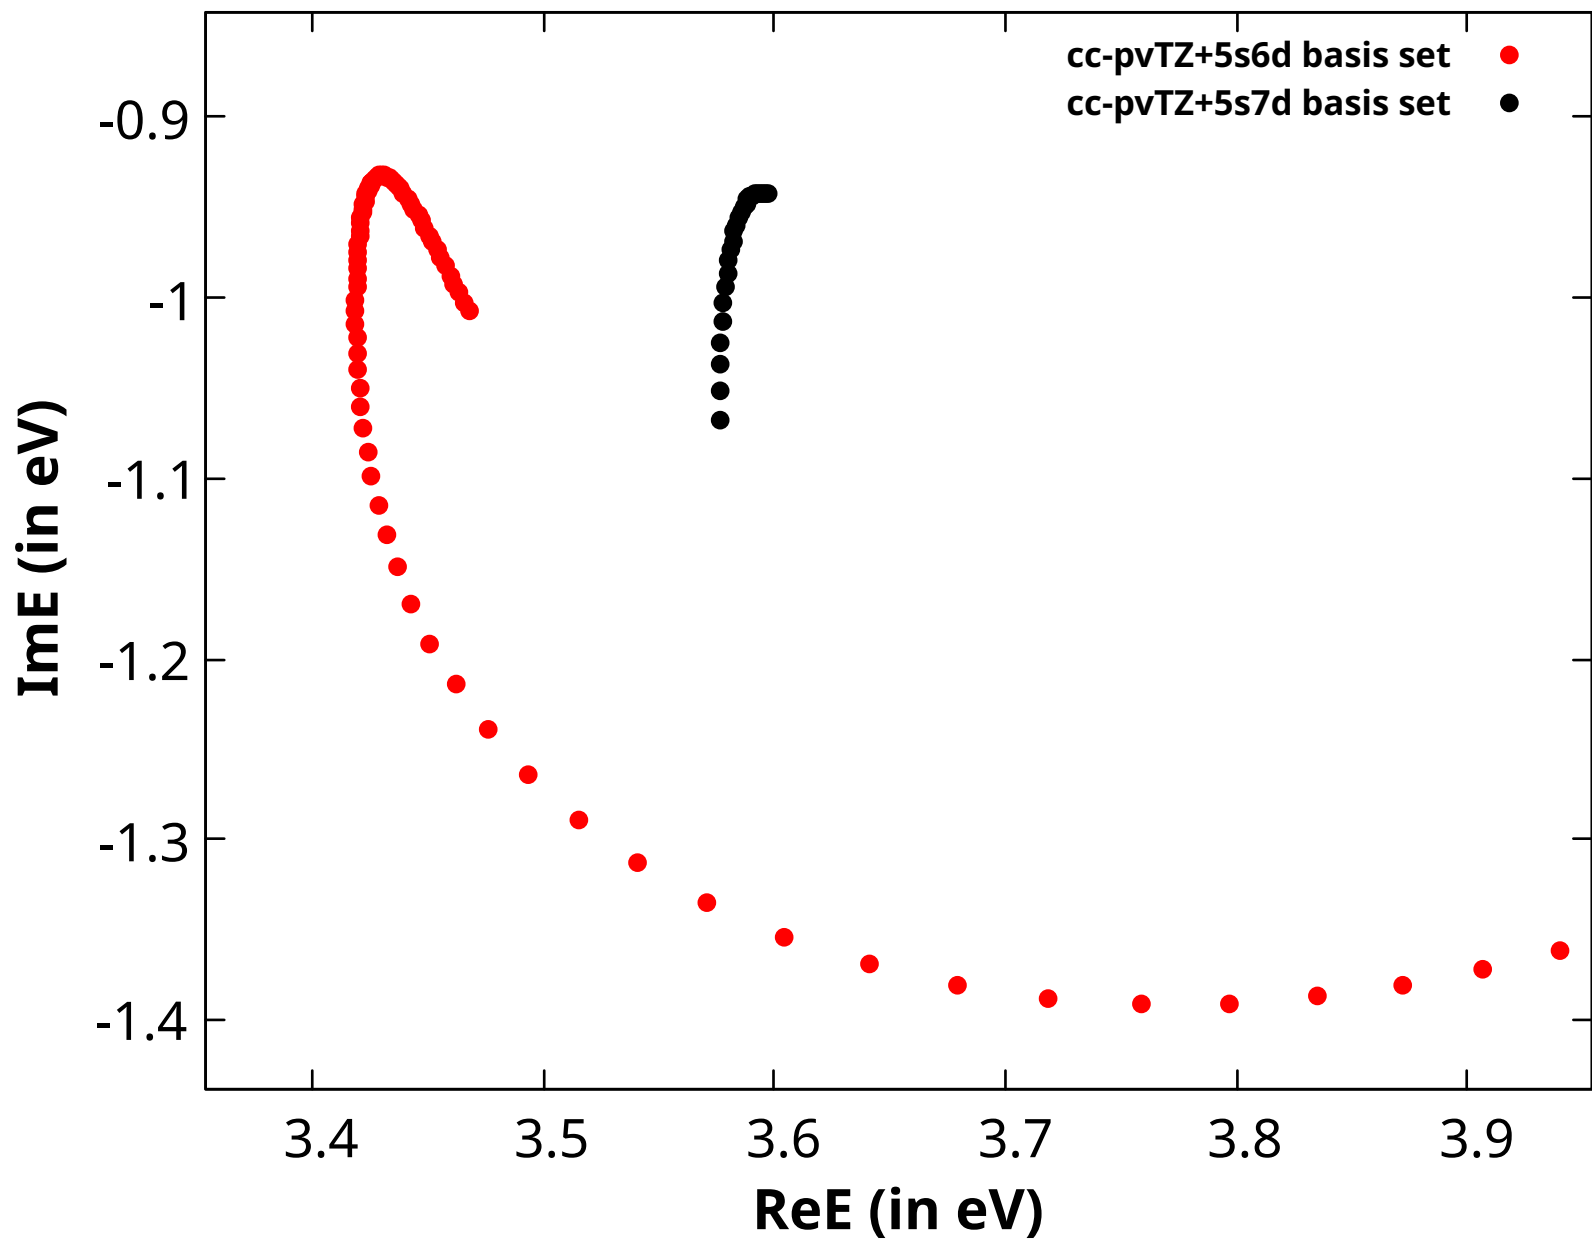

Supplement: d6cp01268j2.zip [file sodep_sif4_1.pdf › supp/extra/sodep_sif4_1.pdf]

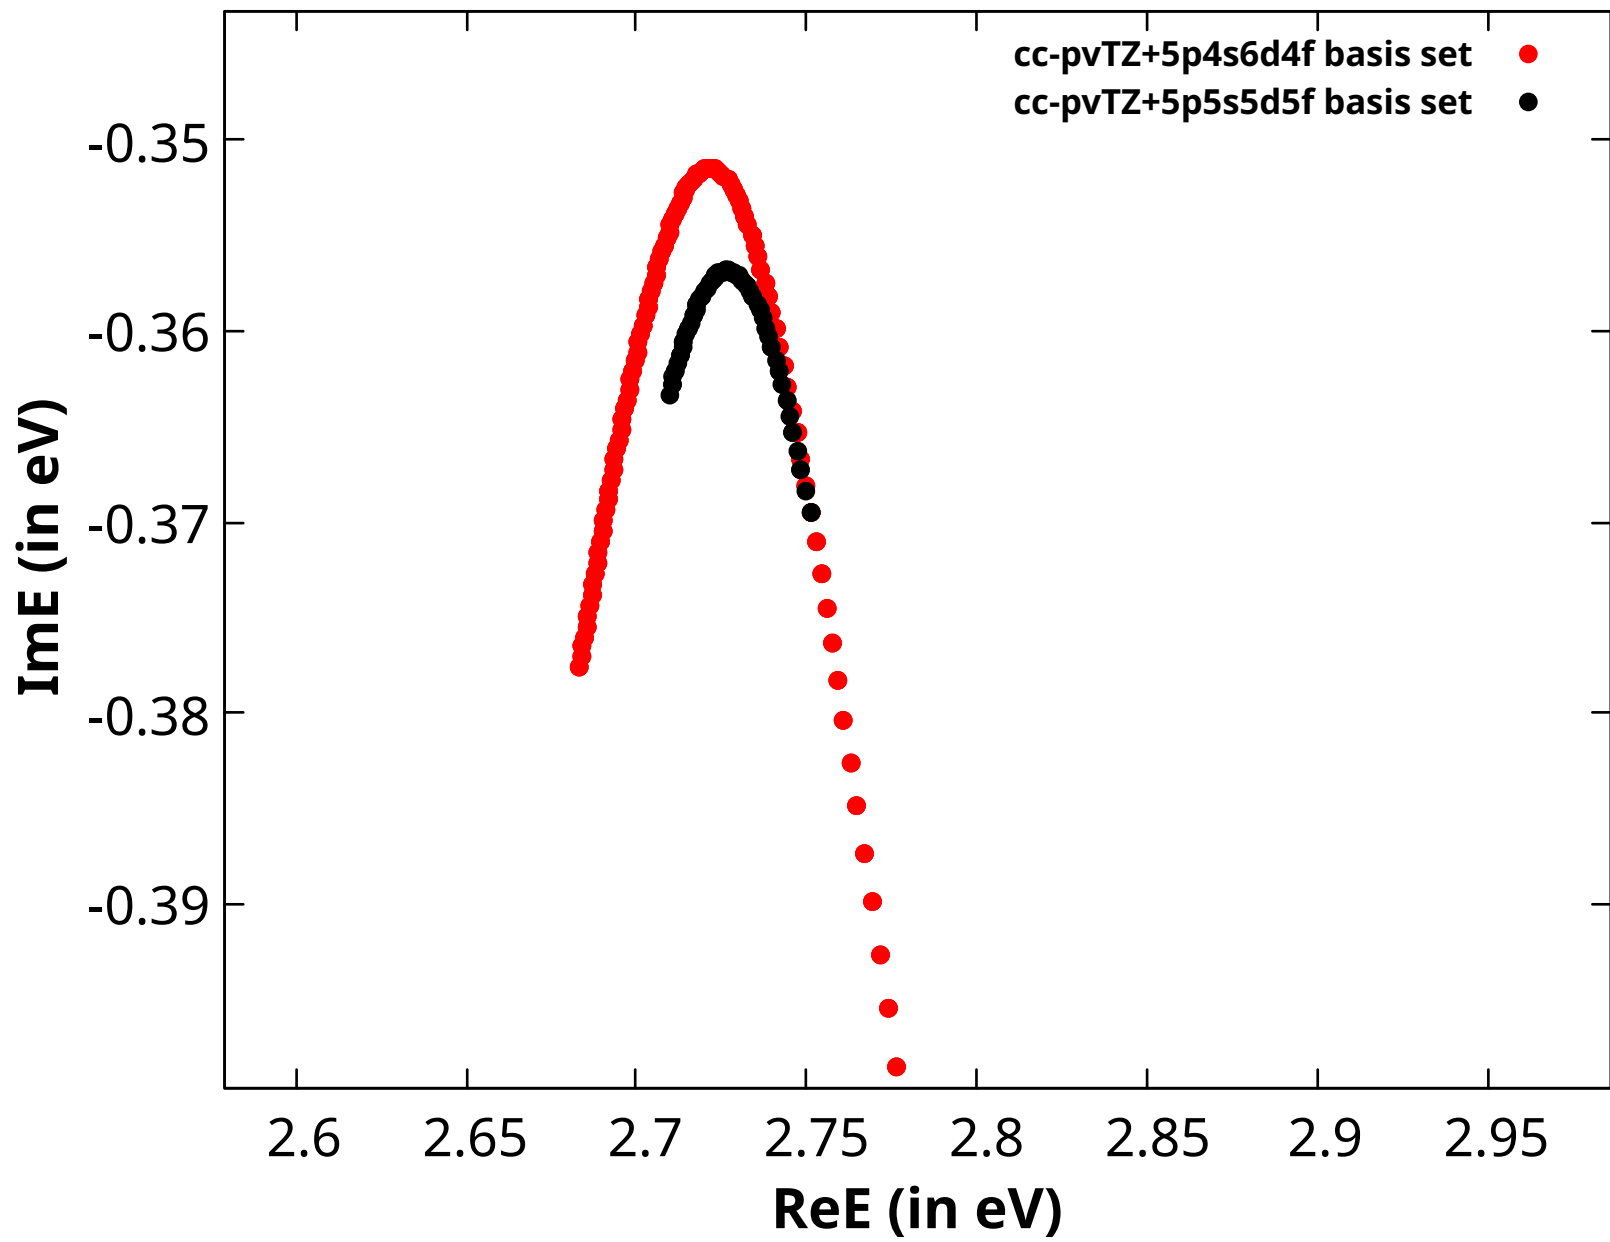

Supplement: d6cp01268j2.zip [file sodep_sih3f.pdf › supp/extra/sodep_sih3f.pdf]

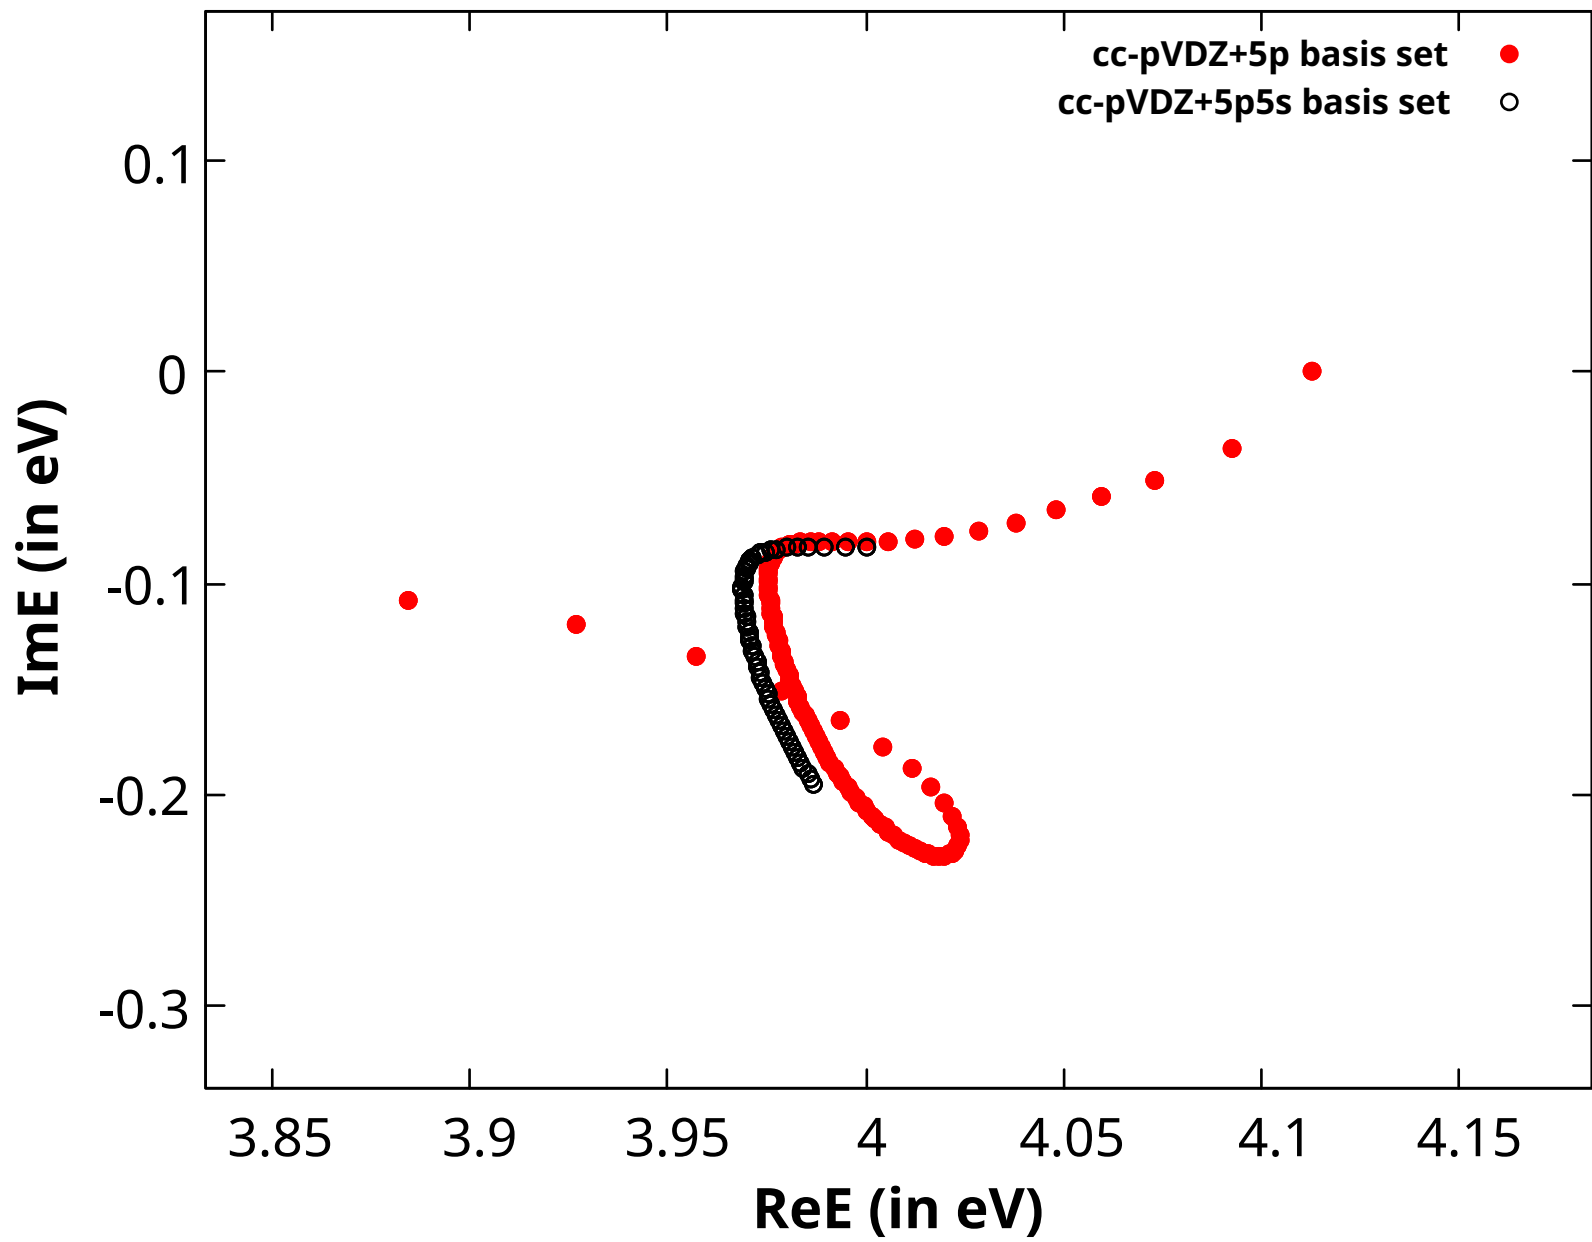

Supplement: d6cp01268j2.zip [file sodep_sih4_1.pdf › supp/extra/sodep_sih4_1.pdf]

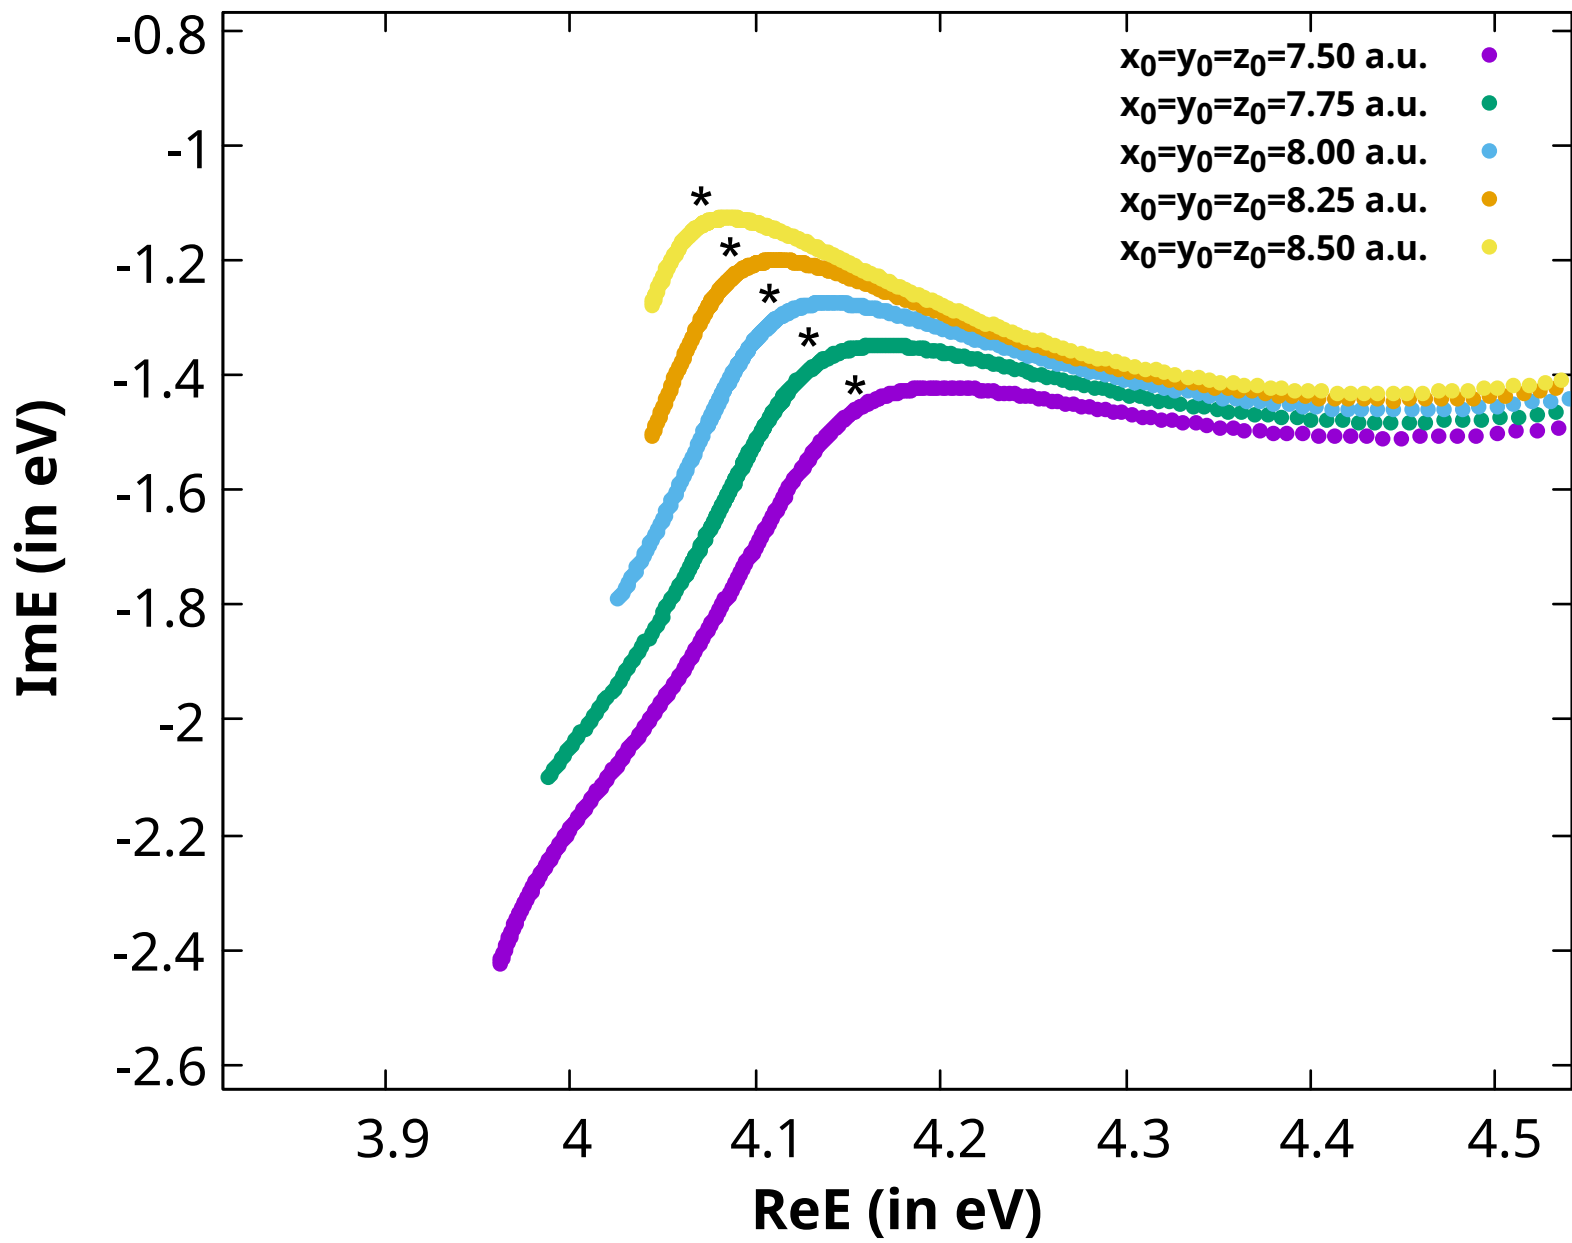

Supplement: d6cp01268j2.zip [file diff_box_2.pdf › supp/sif4/diff_box_2.pdf]

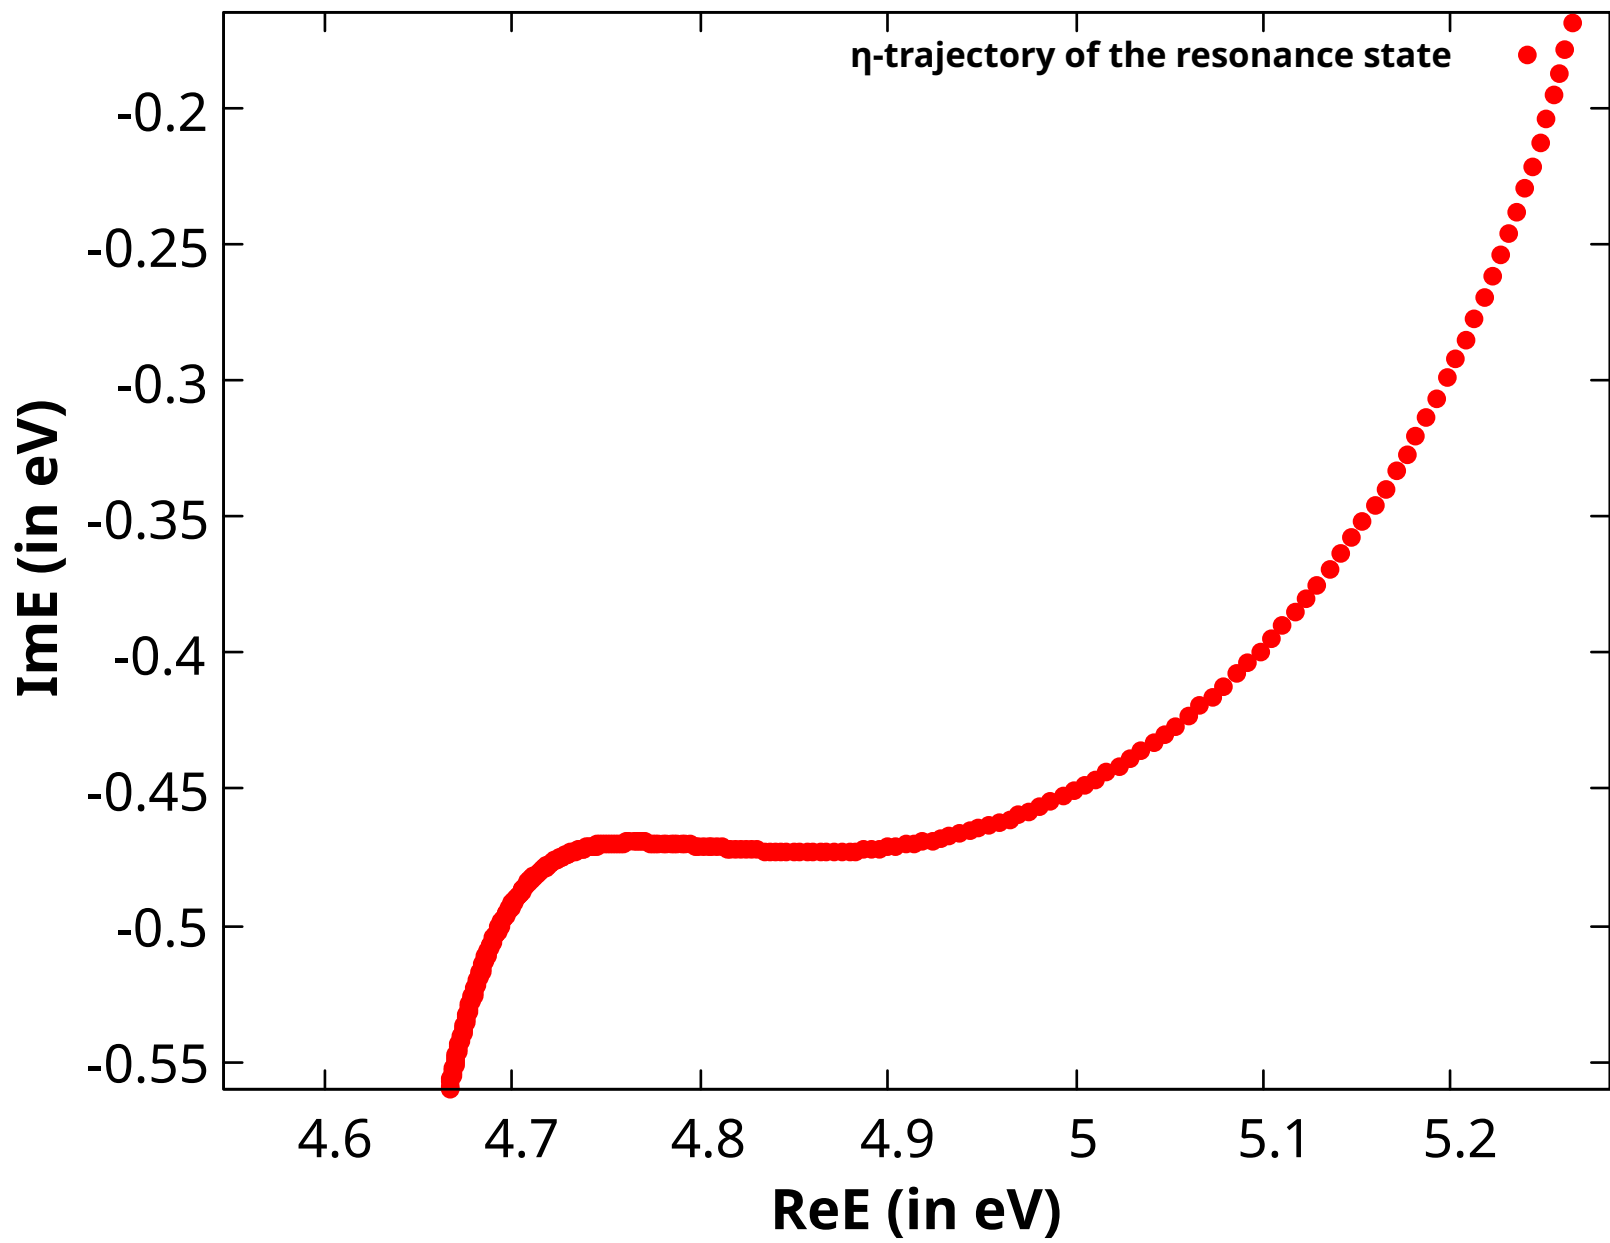

Supplement: d6cp01268j2.zip [file sif4_3s.pdf › supp/sif4/sif4_3s.pdf]

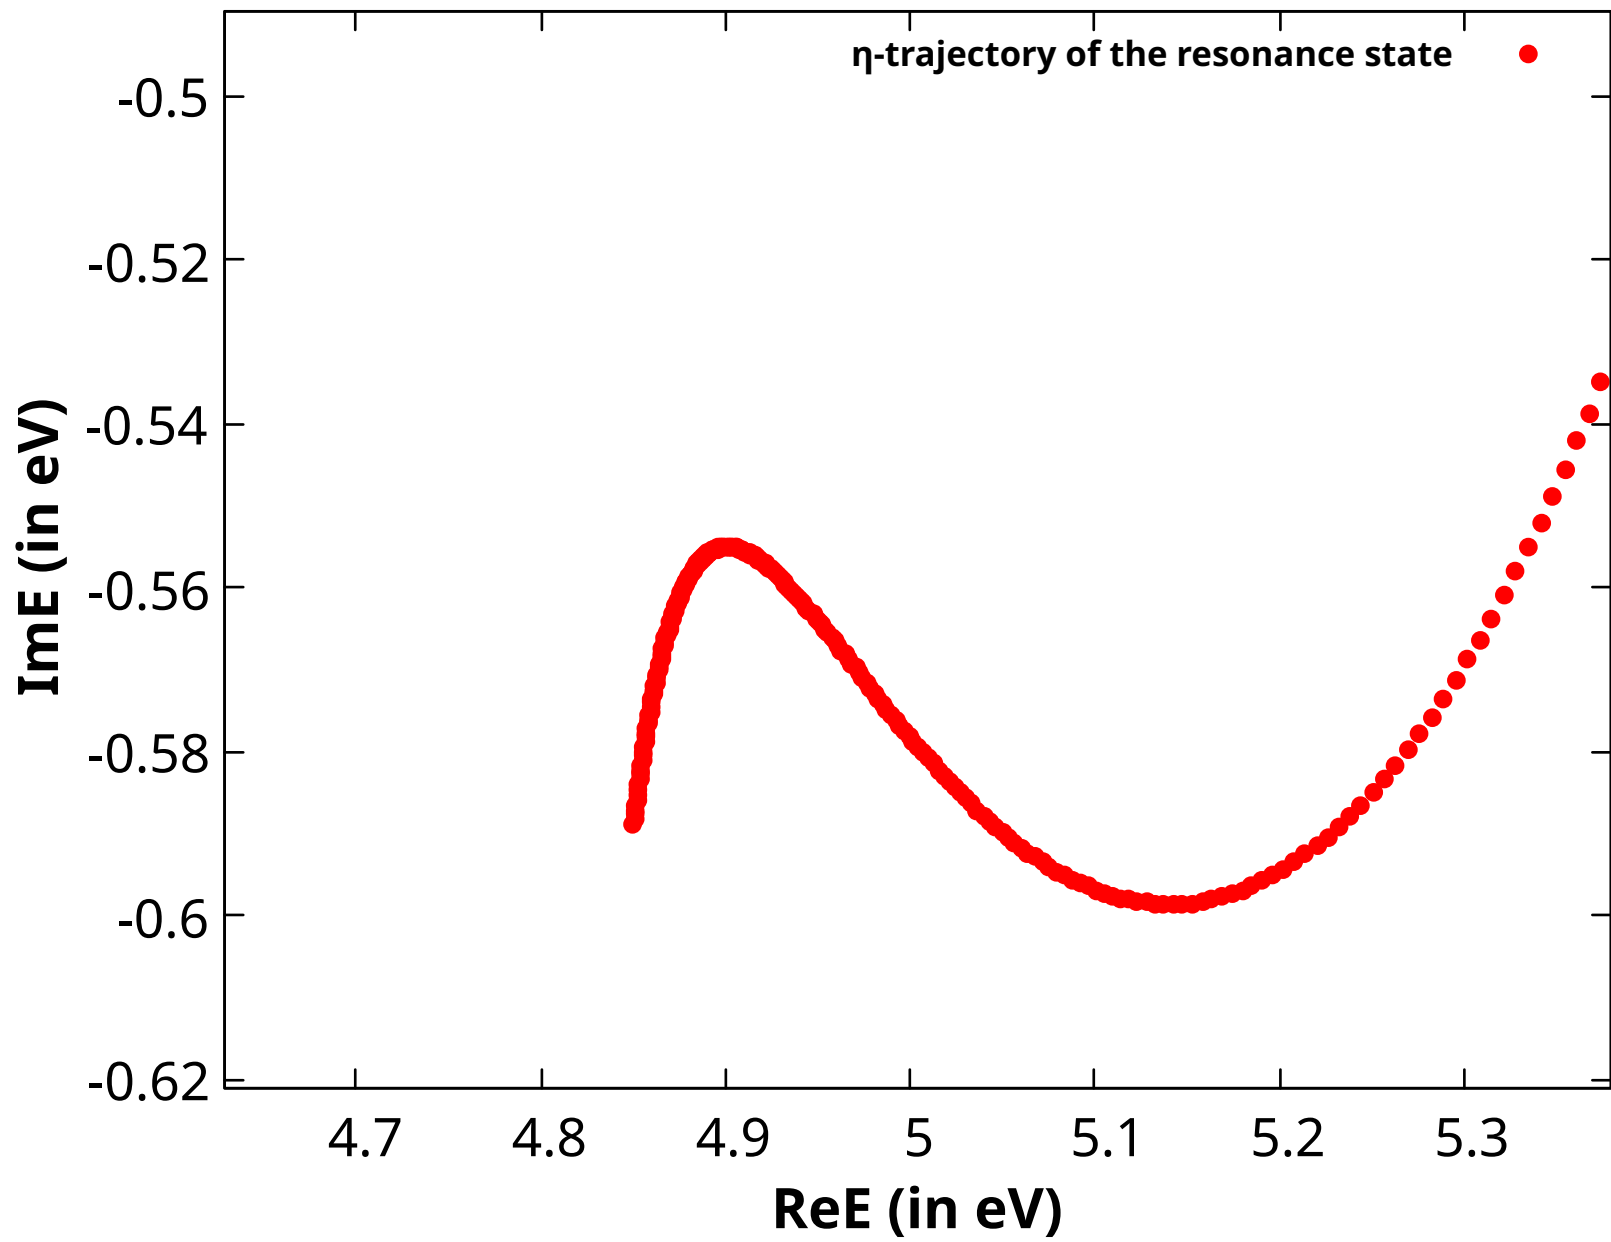

Supplement: d6cp01268j2.zip [file sif4_4s.pdf › supp/sif4/sif4_4s.pdf]

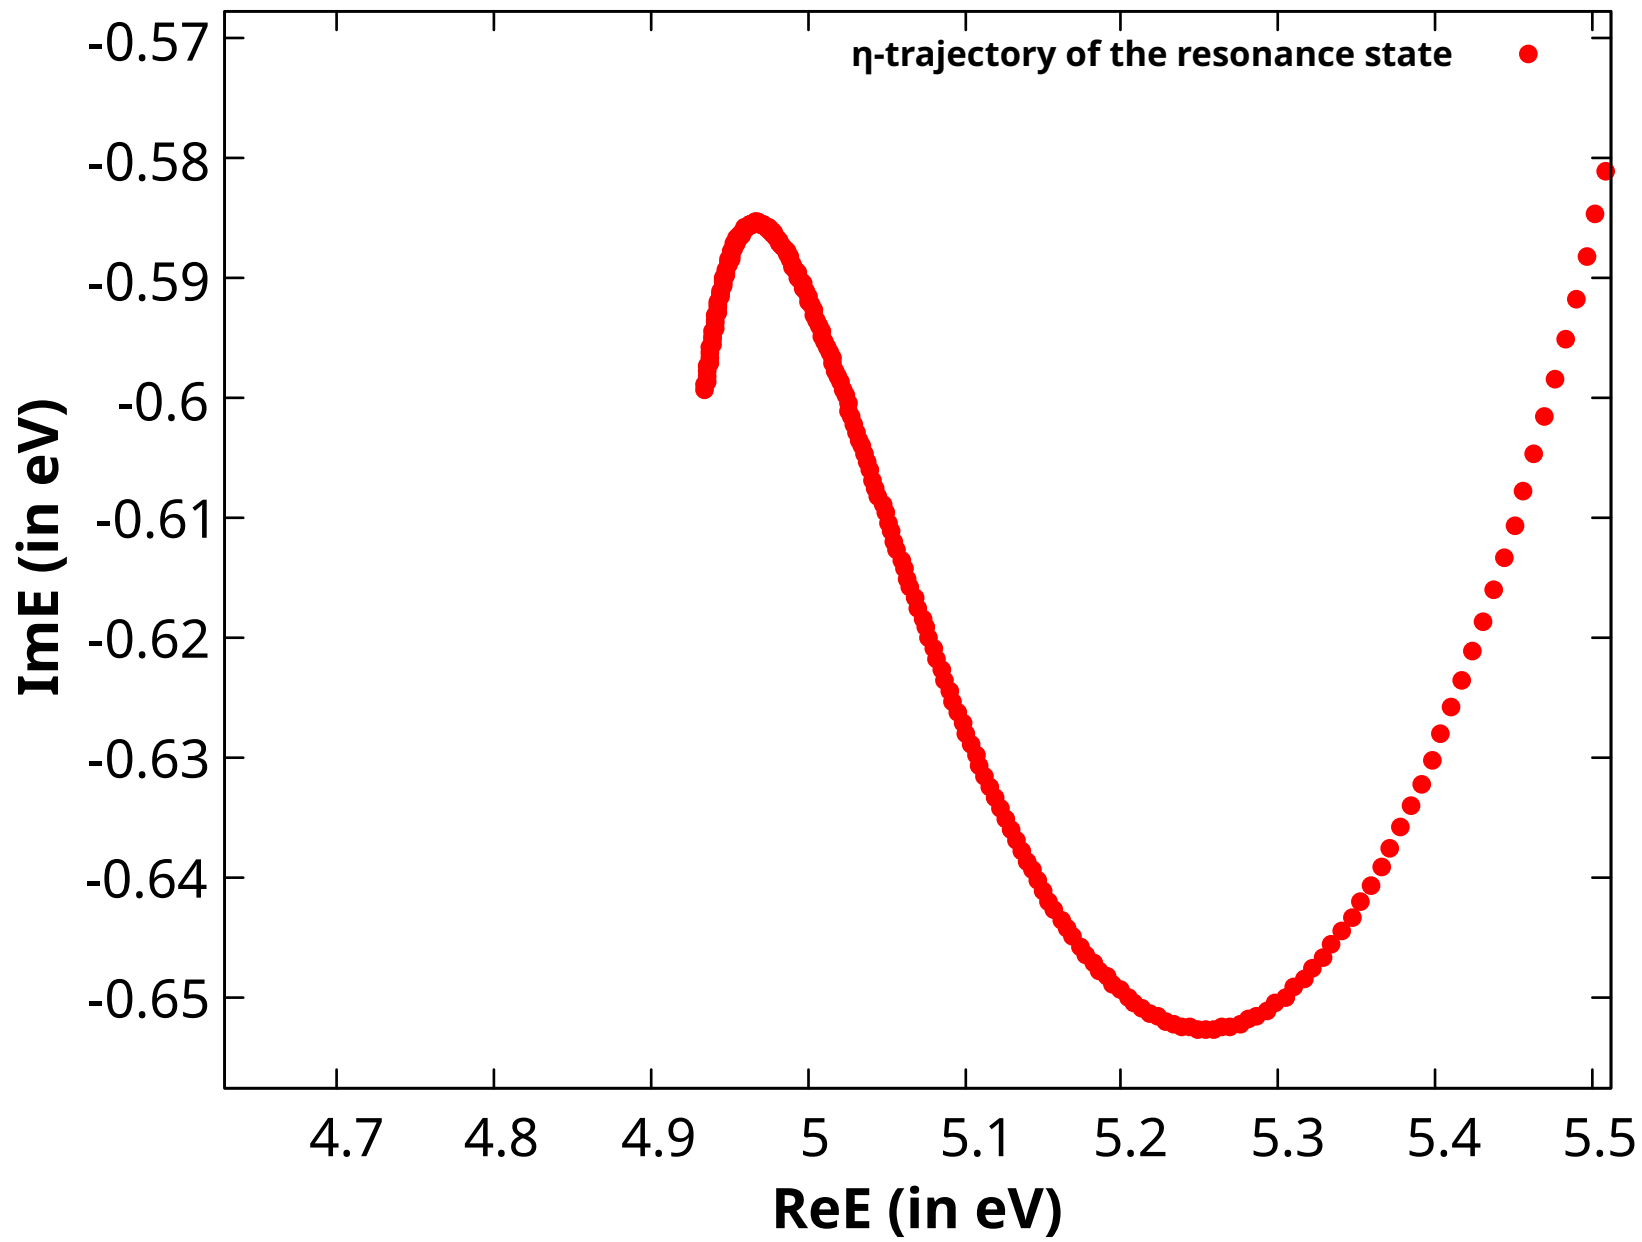

Supplement: d6cp01268j2.zip [file sif4_5s.pdf › supp/sif4/sif4_5s.pdf]

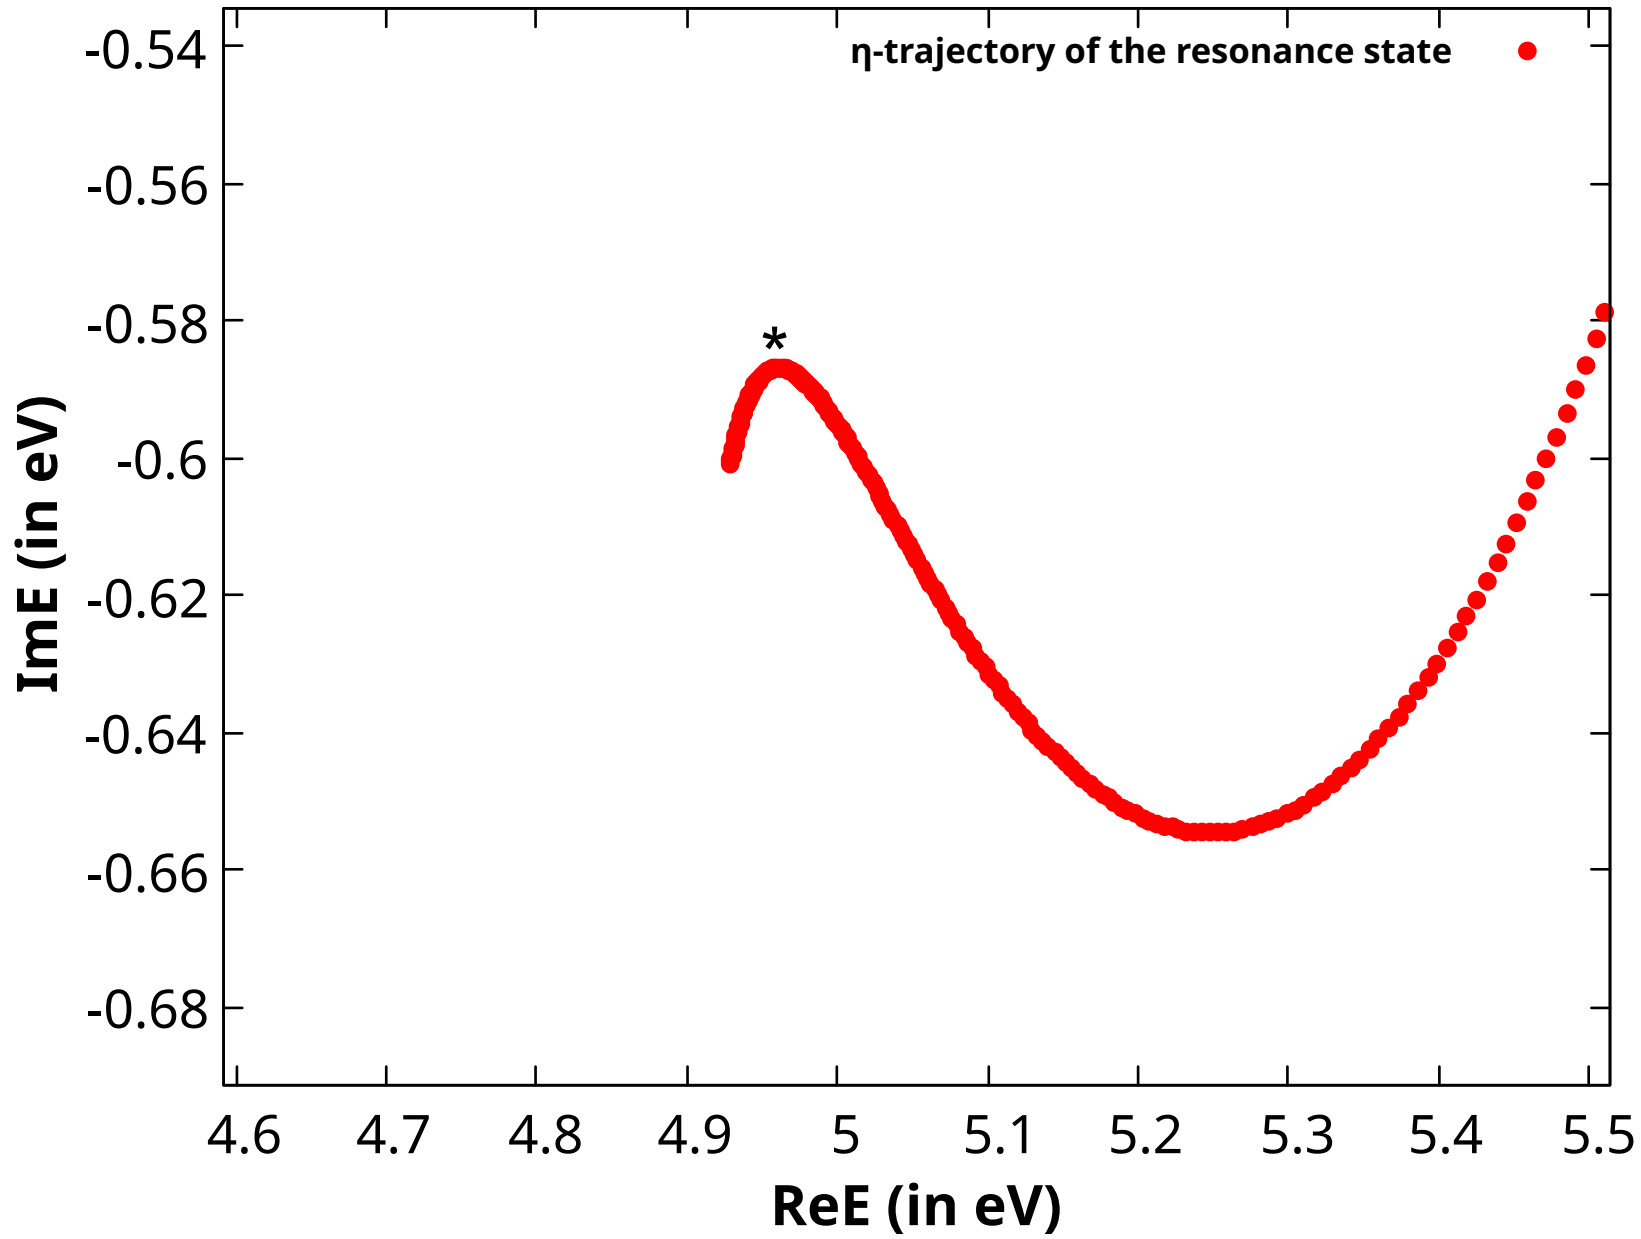

Supplement: d6cp01268j2.zip [file sif4_5s5p.pdf › supp/sif4/sif4_5s5p.pdf]

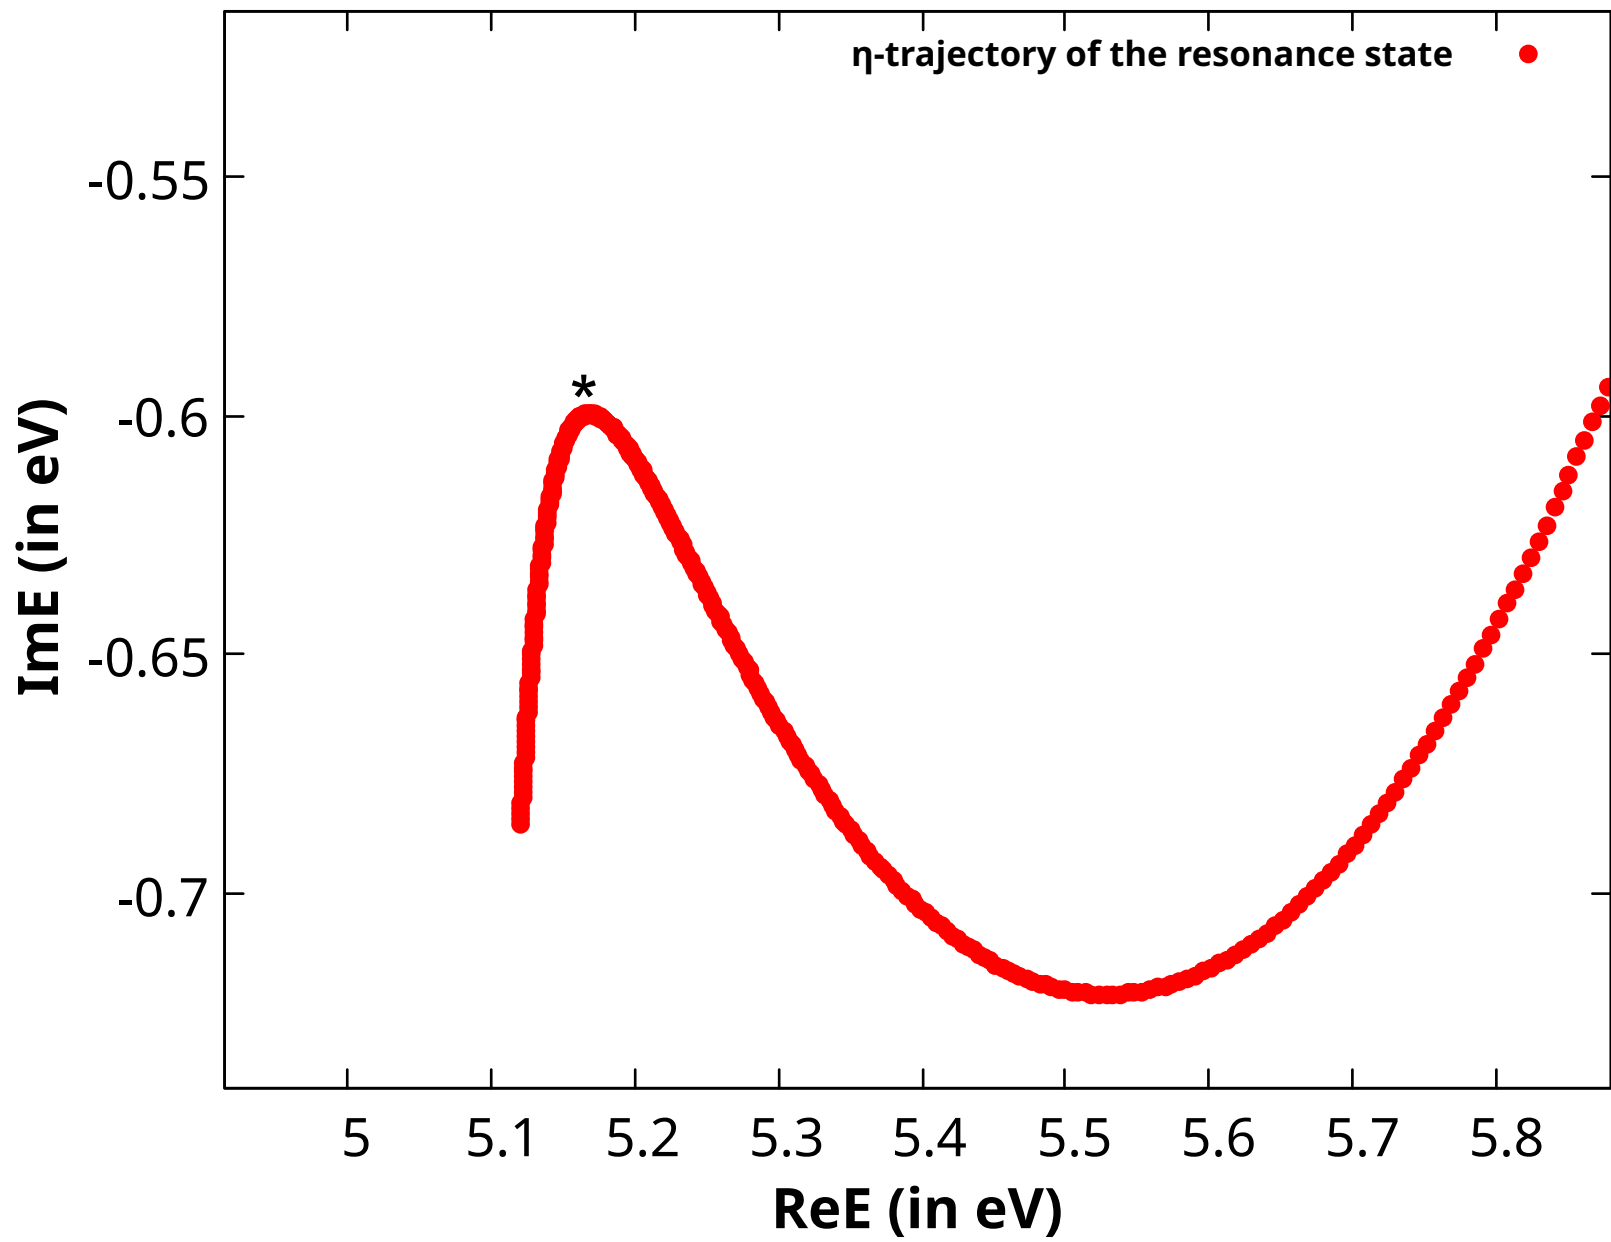

Supplement: d6cp01268j2.zip [file sif4_5s6d.pdf › supp/sif4/sif4_5s6d.pdf]

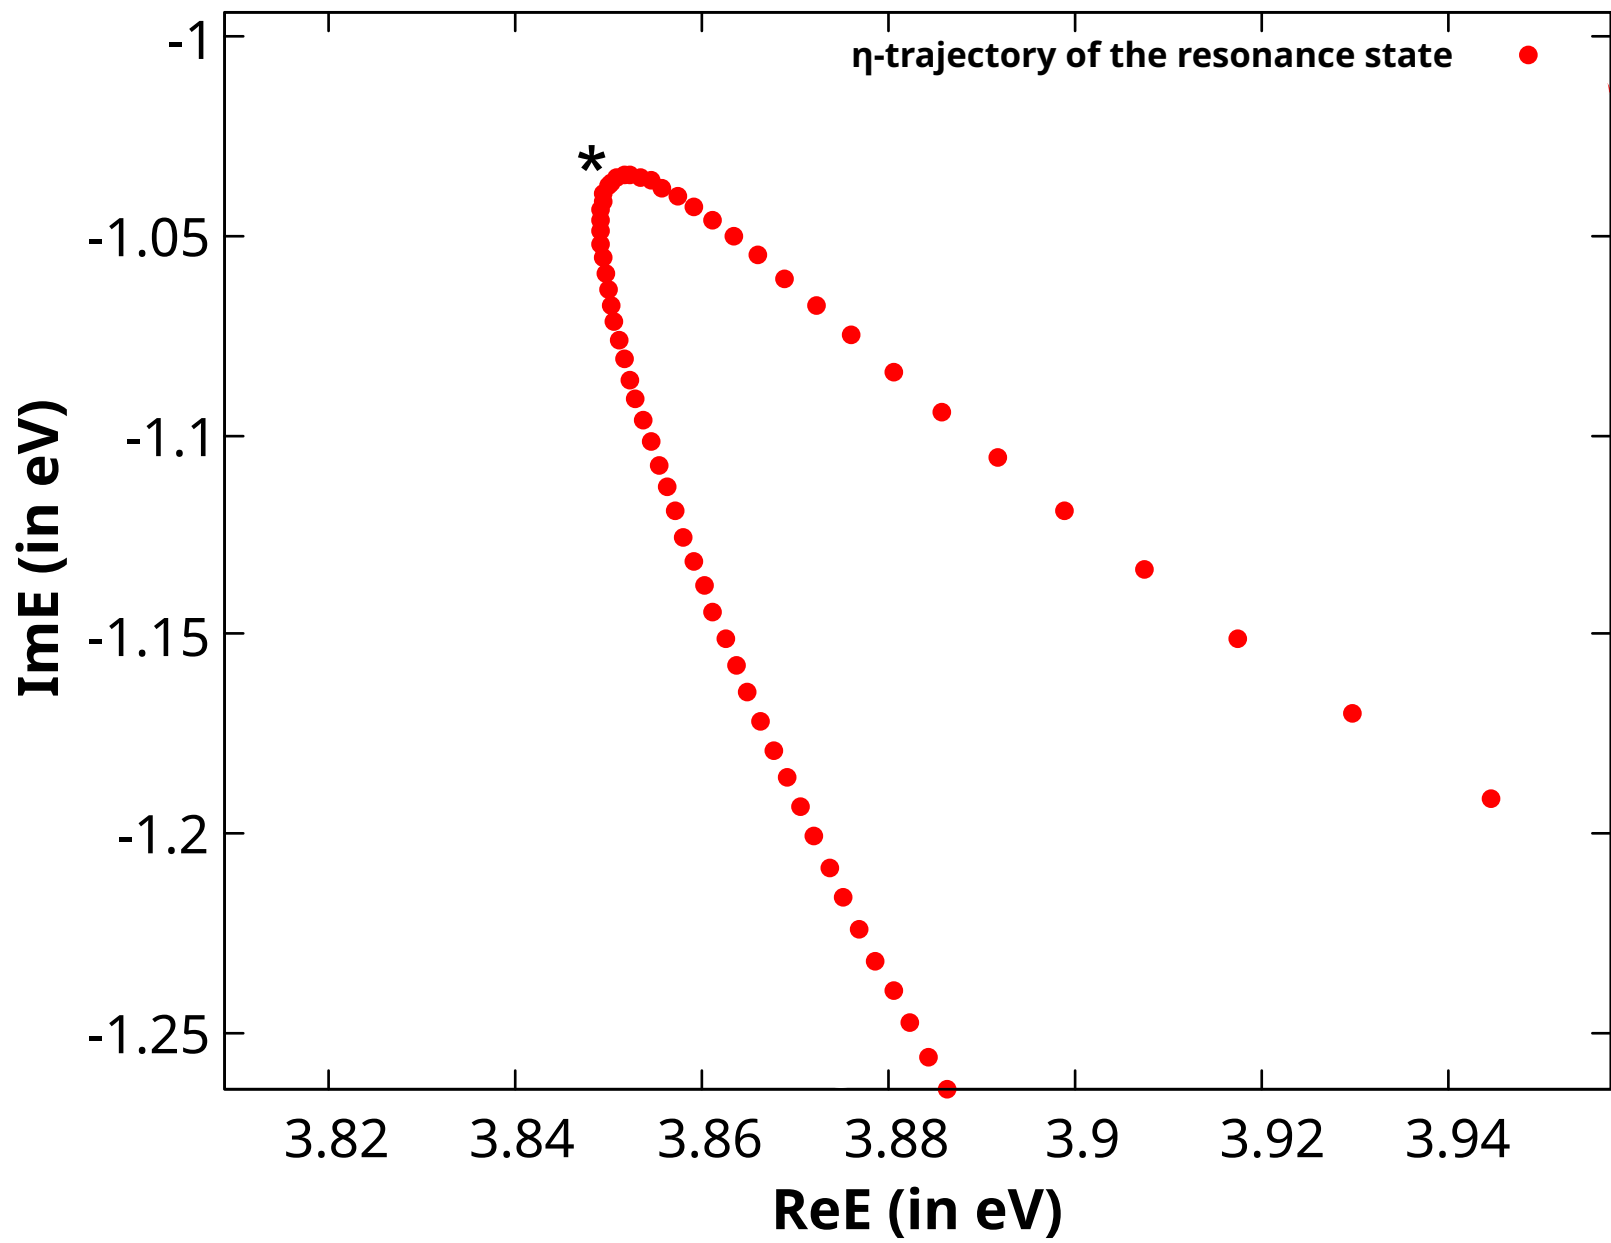

Supplement: d6cp01268j2.zip [file sif4_5s6d5ftz.pdf › supp/sif4/sif4_5s6d5ftz.pdf]

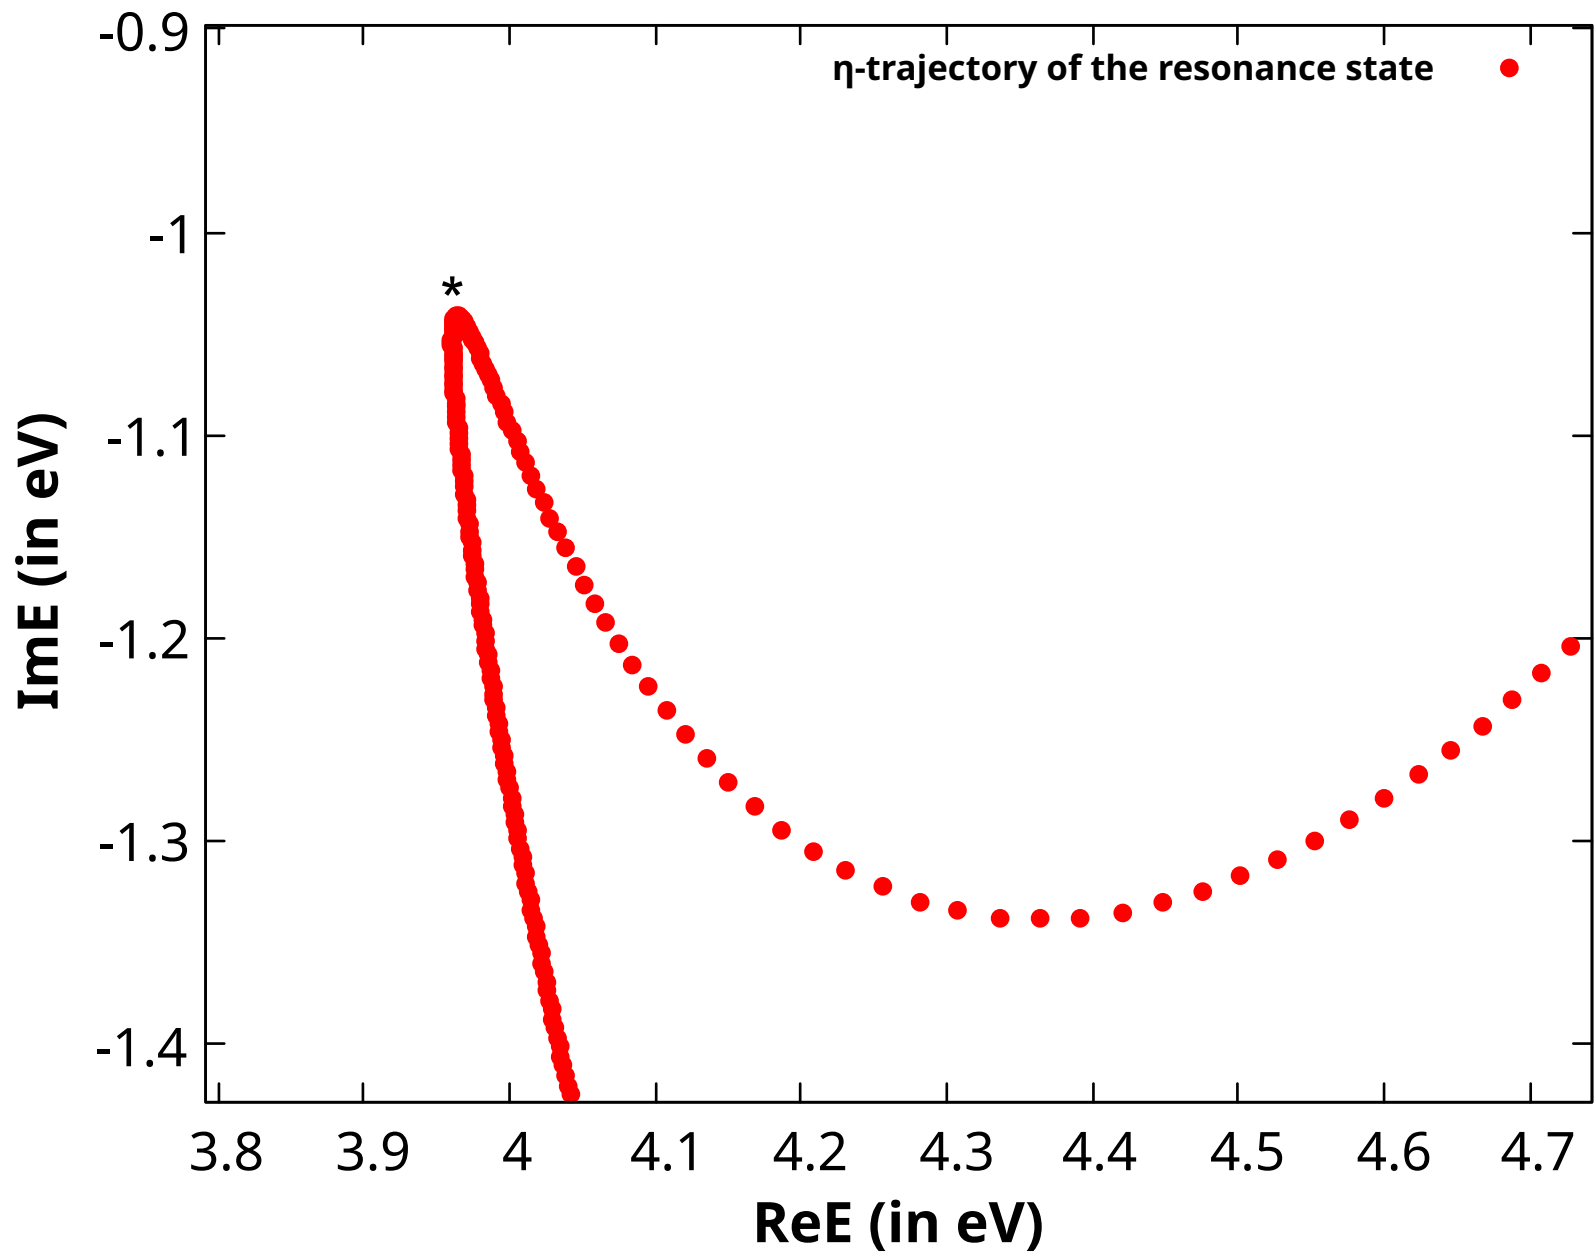

Supplement: d6cp01268j2.zip [file sif4_5s6dtz.pdf › supp/sif4/sif4_5s6dtz.pdf]

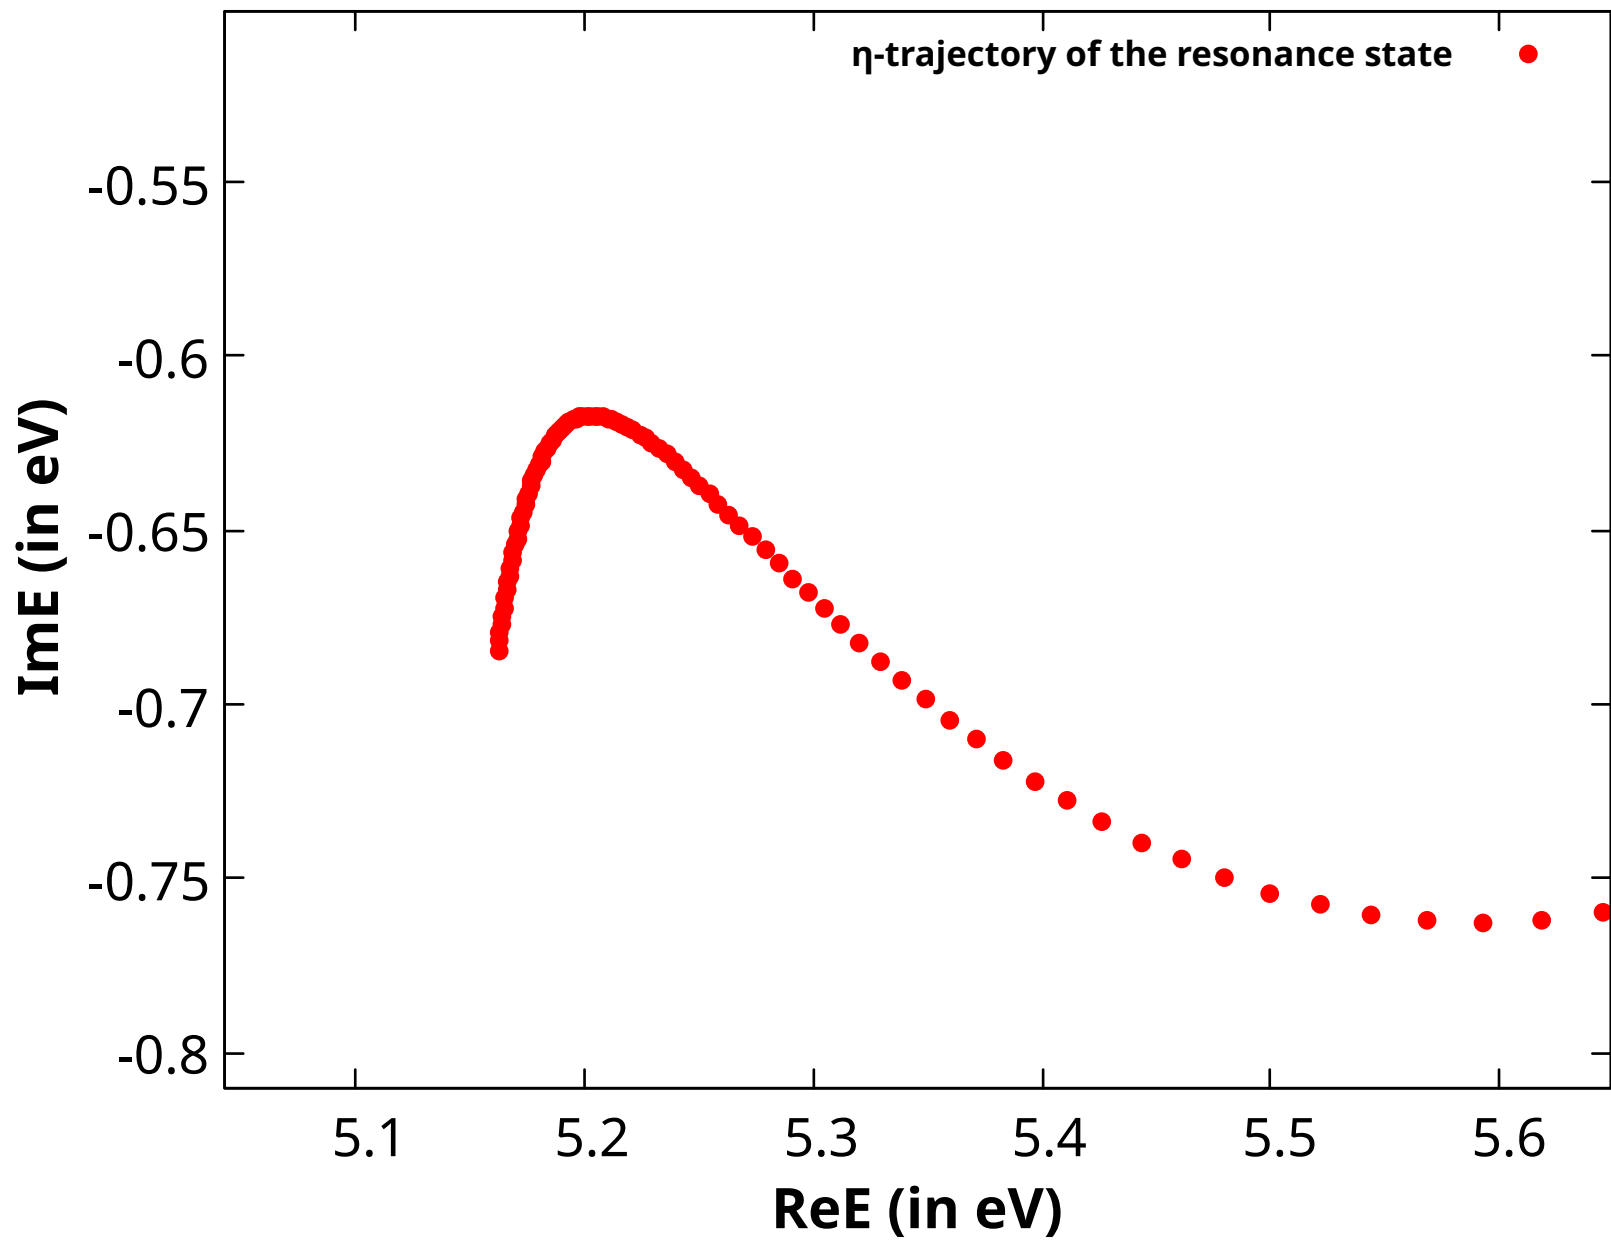

Supplement: d6cp01268j2.zip [file sif4_5s7d.pdf › supp/sif4/sif4_5s7d.pdf]

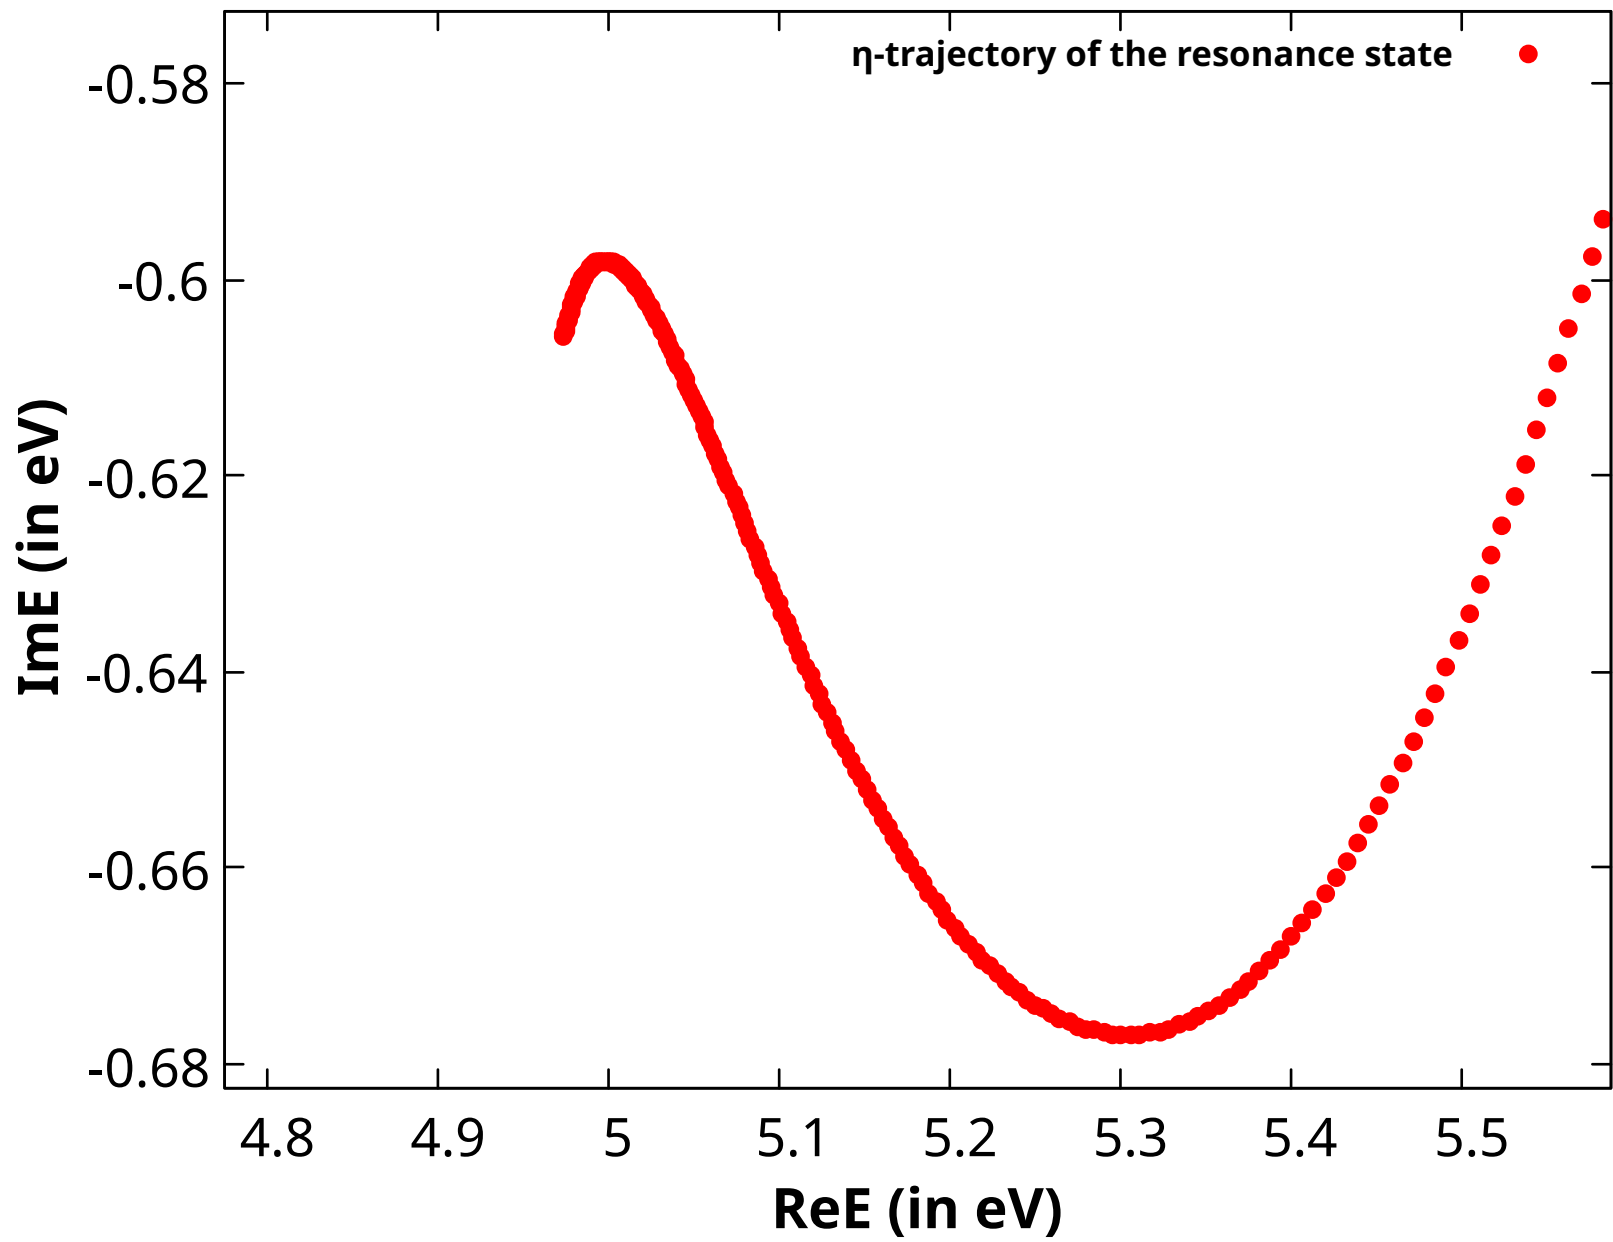

Supplement: d6cp01268j2.zip [file sif4_6s.pdf › supp/sif4/sif4_6s.pdf]

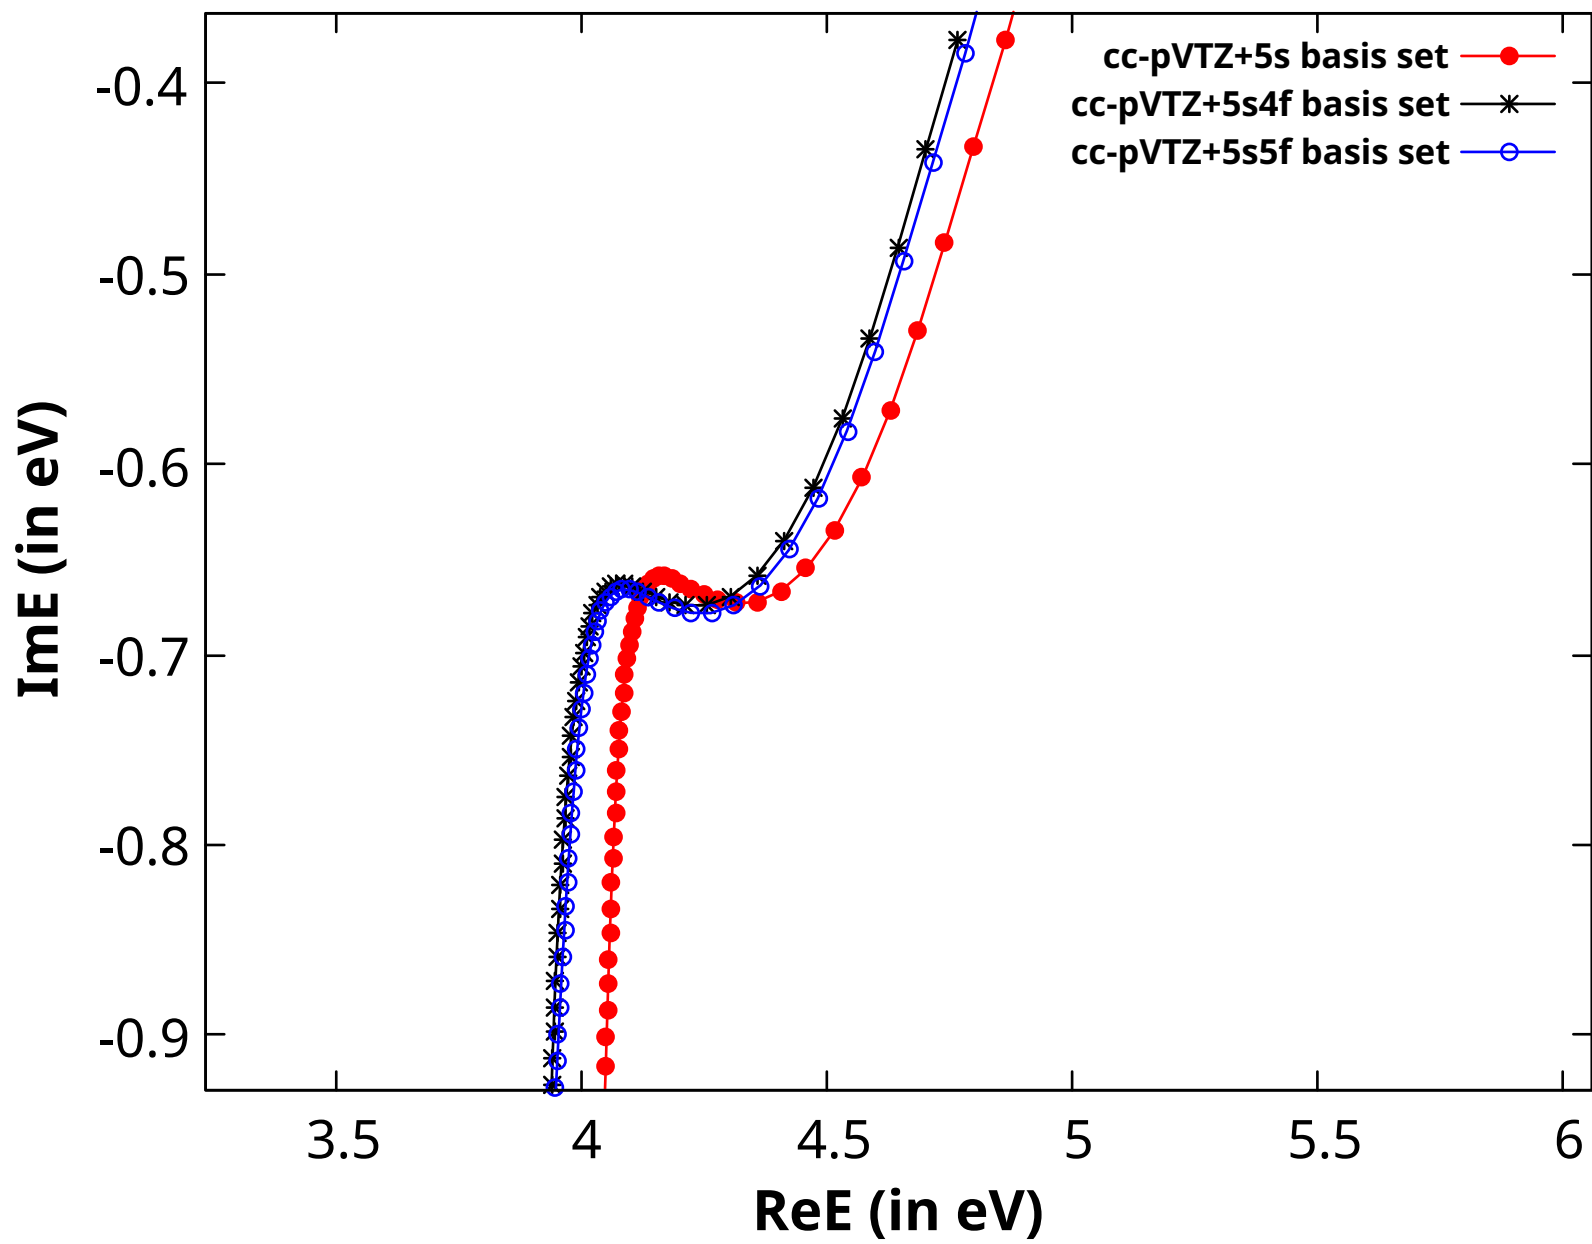

Supplement: d6cp01268j2.zip [file sif4_f.pdf › supp/sif4/sif4_f.pdf]

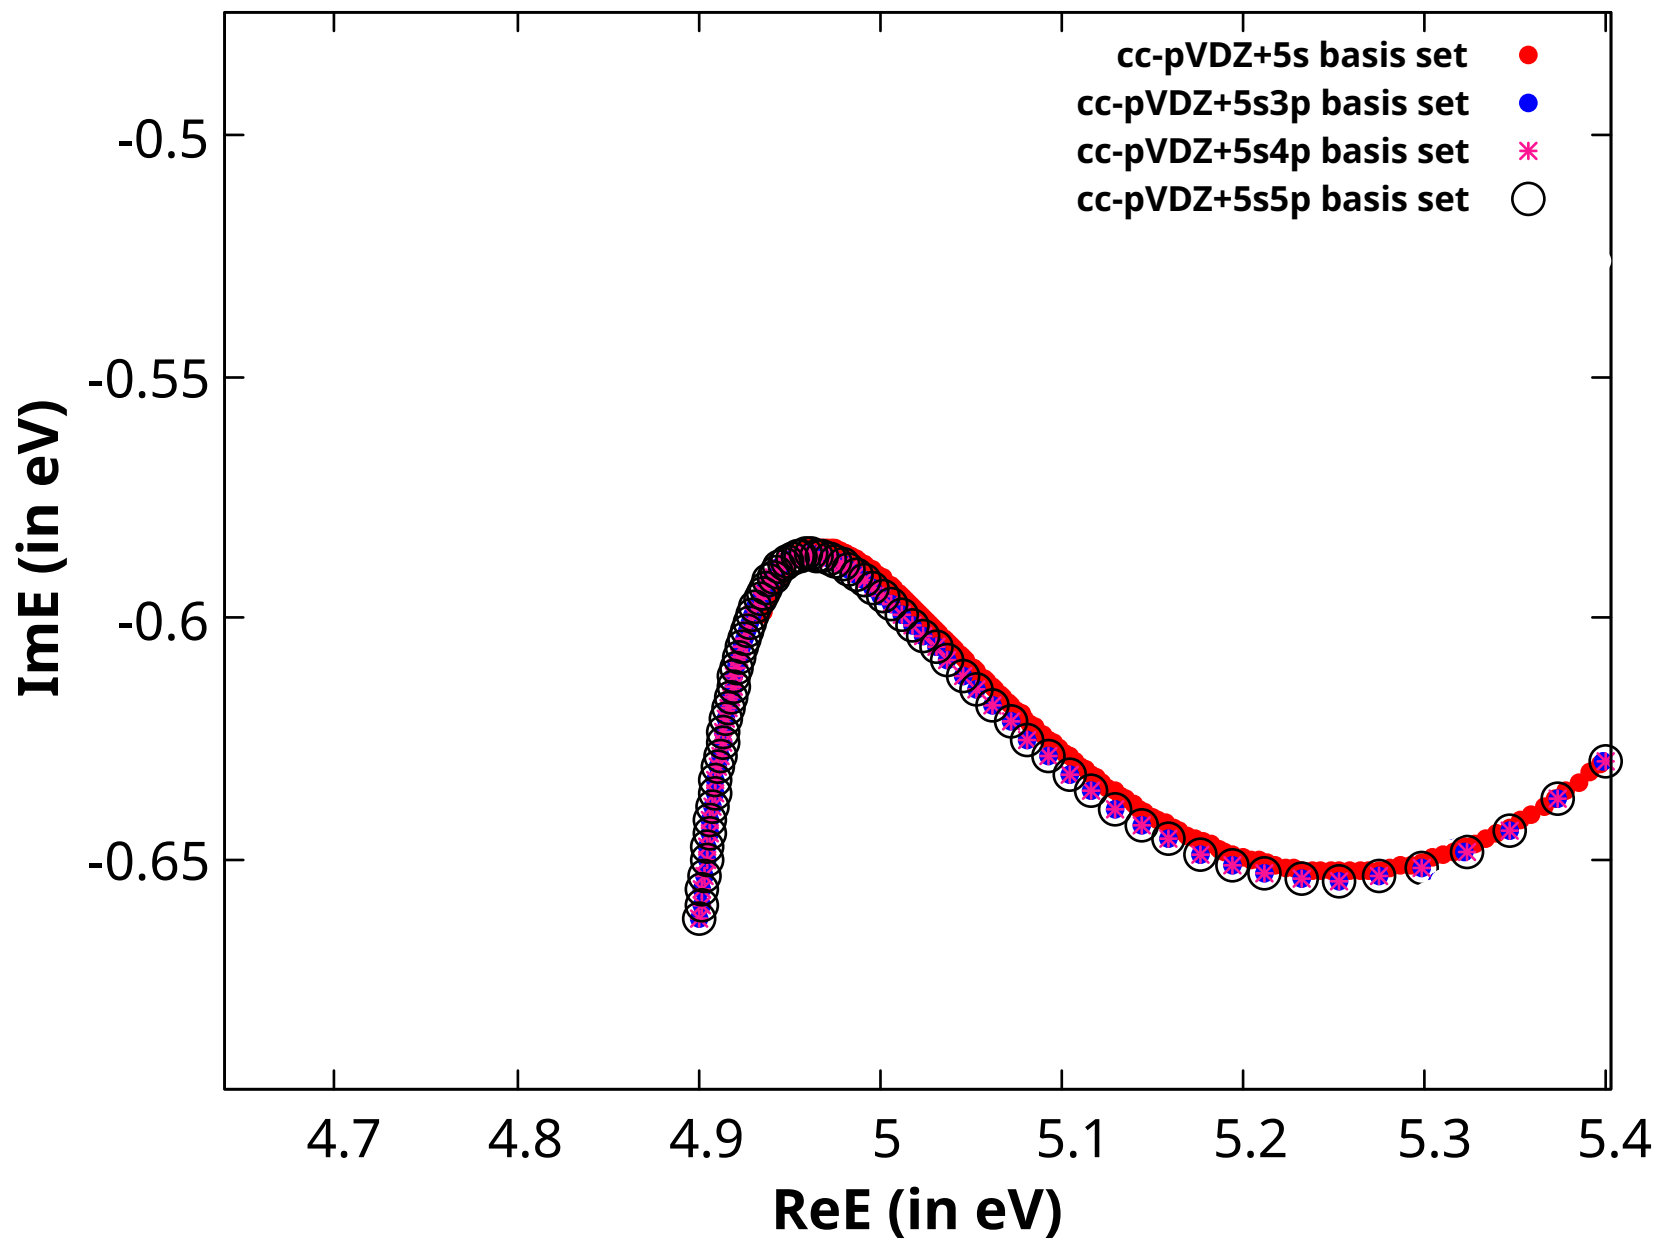

Supplement: d6cp01268j2.zip [file sif4_sp.pdf › supp/sif4/sif4_sp.pdf]

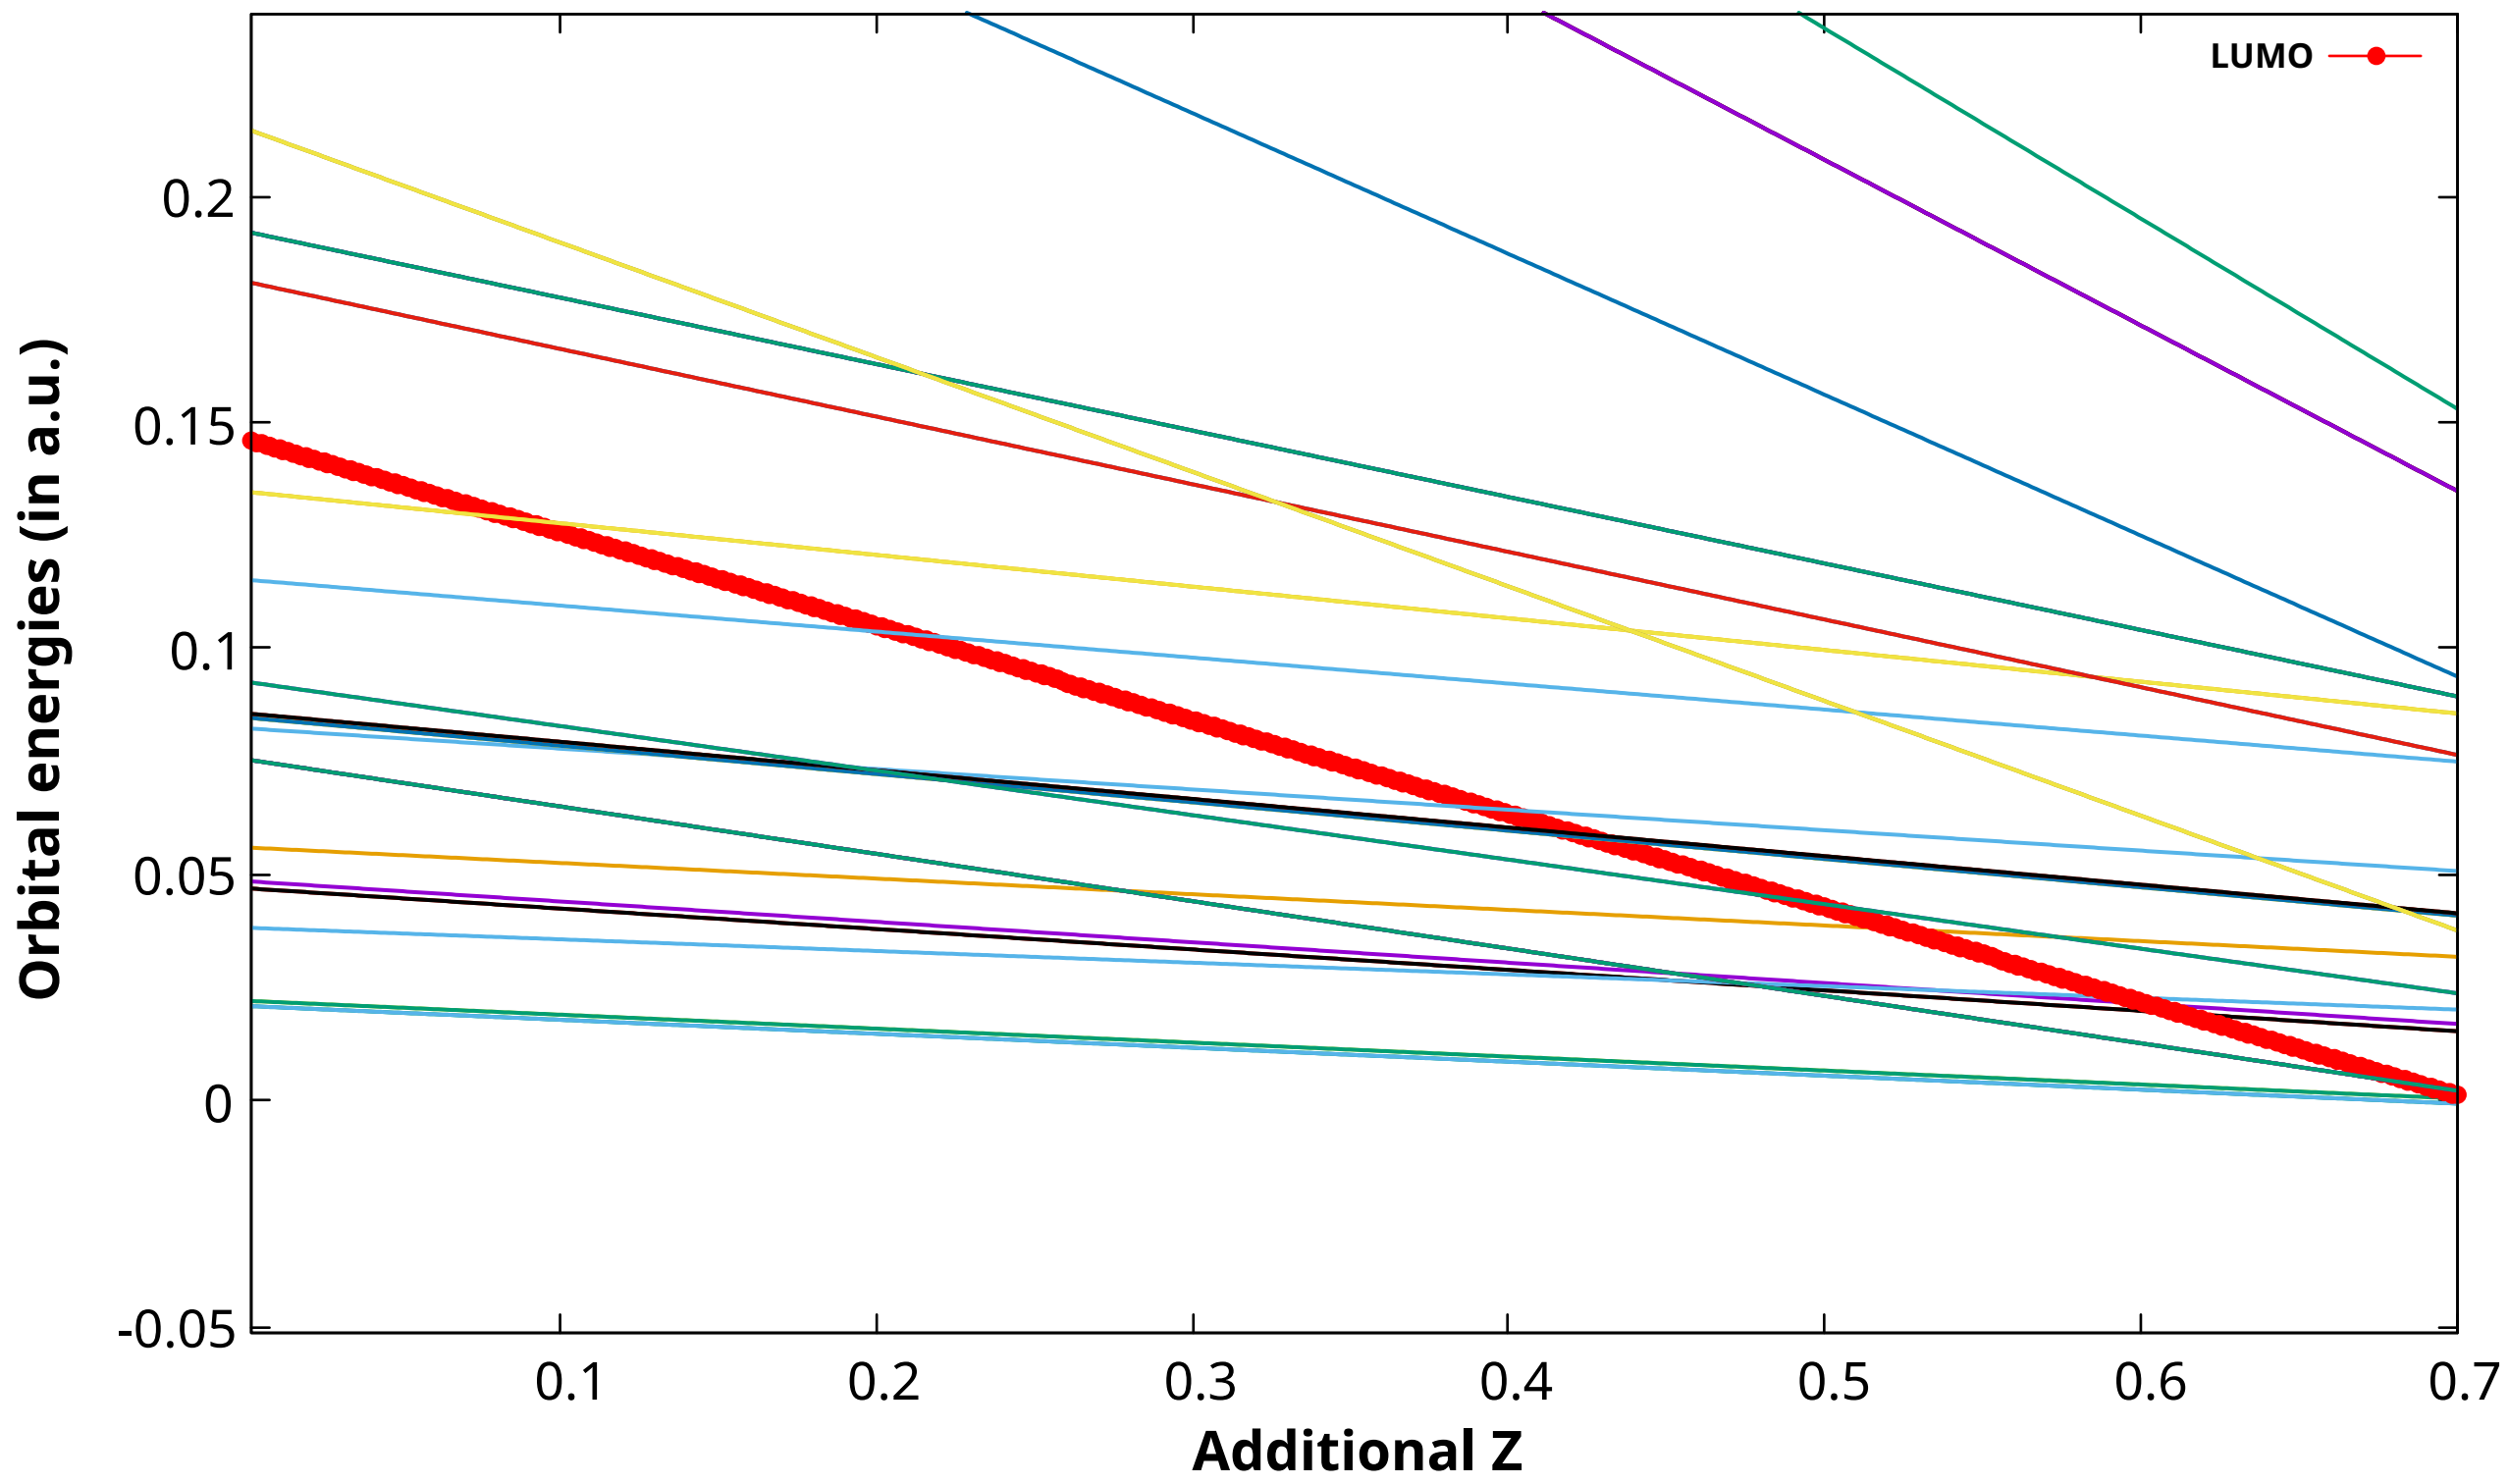

Supplement: d6cp01268j2.zip [file tz_5s6d_charge.pdf › supp/sif4/tz_5s6d_charge.pdf]
